# 1 Control of Hox transcription factor concentration 2 and cell-to-cell variability by an auto-regulatory 3 switch

4  
5 **Dimitrios K. Papadopoulos<sup>1,\*</sup>, Kassiani Skouloudaki<sup>1</sup>, Ylva Engström<sup>2</sup>, Lars  
6 Terenius<sup>3</sup>, Rudolf Rigler<sup>4,5</sup>, Vladana Vukojević<sup>3</sup> and Pavel Tomancak<sup>1,\*</sup>**

7  
8 <sup>1</sup>Max-Planck Institute for Molecular Cell Biology and Genetics, 01307 Dresden,  
9 Germany

10 <sup>2</sup>Department of Molecular Biosciences, The Wenner-Gren Institute, Stockholm  
11 University, 10691 Stockholm, Sweden

12 <sup>3</sup>Center for Molecular Medicine (CMM), Department of Clinical Neuroscience,  
13 Karolinska Institutet, 17176 Stockholm, Sweden

14 <sup>4</sup>Department of Medical Biochemistry and Biophysics, Karolinska Institutet, 17177  
15 Stockholm, Sweden

16 <sup>5</sup>Laboratory of Biomedical Optics, Swiss Federal Institute of Technology, 1015  
17 Lausanne, Switzerland

18

19 \*Correspondence: papadopo@mpi-cbg.de and tomancak@mpi-cbg.de

20

21 Author contributions: DKP and VV, designed and performed the binding study of  
22 *Antp*, analyzed the data; DKP and KS, designed and performed the study of *Antp*  
23 relative transcript abundance, analyzed the data; YE, provided the *Antp* P1 reporter  
24 line; DKP and PT, conceived the comparative analysis of TFs and the examination of  
25 *Antp* variation in second instar imaginal discs; DKP, conceived the project, designed  
26 and performed all remaining experiments, analyzed the data, prepared figures, wrote  
27 the manuscript; DKP, KS, YE, LT, RR, VV and PT critically reviewed the manuscript  
28 and approved it for submission.

29

## 30 **Abstract**

31 Concentration and DNA-binding kinetics of transcription factors (TFs) are  
32 crucial determinants of their function. Using Fluorescence Correlation Spectroscopy  
33 (FCS), we have characterized the concentration and cell-to-cell variability of 14  
34 endogenously tagged TFs in live *Drosophila* imaginal discs. We found that variation  
35 in the concentration of different TFs among neighboring cells decreased with  
36 increasing average TF concentrations. Among the investigated TFs, Antennapedia  
37 (Antp), displayed the lowest average variability and transitioned from a low  
38 concentration/high variation state in second instar to a high concentration/low  
39 variation state in third instar imaginal discs. Using FCS and temporally resolved gain-  
40 and loss-of-function genetic studies we have uncovered that Antp is necessary and  
41 sufficient to drive a developmental regulatory switch from a state of auto-activation to  
42 a state of auto-repression. This mechanism is controlled by a progressive change in  
43 the relative concentrations of preferentially activating and repressing Antp isoforms  
44 that bind with different affinities to DNA.

45

## 46 **Introduction**

47 In order to understand the mechanisms that control pattern formation and cell  
48 fate specification in developing organisms, the intranuclear concentration, DNA-  
49 binding kinetics and cell-to-cell variability of relevant TFs need to be quantitatively  
50 characterized. TF concentration variability at the tissue level is thought to arise from  
51 diverse processes, including protein production and degradation. For example, gene  
52 transcription in a given tissue is generally a noisy process. The noise is both intrinsic  
53 to the gene expressed (Blake et al., 2003; Elowitz et al., 2002) and also due to  
54 variation arising from components of the post-transcriptional cellular machinery

55 (Swain et al., 2002). These can influence the expression and production of functional  
56 protein, resulting in protein concentration that exhibits variability among cells.

57 In undifferentiated tissue or cells, this TF cell-to-cell variability can be the  
58 driving force for differentiation. For example, progressive establishment of a Nanog  
59 salt-and-pepper expression pattern leads to the formation of primitive endoderm in  
60 the mouse preimplantation embryo, whereas loss of the variation results in embryos  
61 lacking primitive endoderm entirely (Kang et al., 2013). In *Drosophila*, *Senseless*  
62 (*Sens*) expression is required for the establishment of proper number of sensory  
63 organ precursors in the ectodermal proneural cluster of cells and unequal  
64 concentration among cells is required for their specification (Li et al., 2006). Finally,  
65 variation in concentration (rather than its overall average concentration) of the Yan  
66 TF causes the transition of developing photoreceptor cells to a differentiated state  
67 during *Drosophila* eye development (Pelaez et al., 2015).

68 Conversely, in already differentiated tissue or cells, which have acquired a  
69 steady state during development, TF variability may need to be counteracted across  
70 cells to ensure homogeneity of gene expression patterns and robustness of  
71 commitment to a certain transcriptional regime. Such a function has been identified  
72 for the Snail (*Sna*) TF, which is required for the invagination of the mesoderm during  
73 *Drosophila* gastrulation (Boettiger and Levine, 2013), or the Bicoid (*Bcd*) and  
74 Hunchback (*Hb*) TFs during early embryogenesis (Gregor et al., 2007a; Gregor et  
75 al., 2007b; Little et al., 2013). These studies have quantified the tolerable degrees of  
76 concentration variability allowing establishment of gene expression territories of  
77 remarkable precision in the developing embryo.

78 Finally, differential fates within the same developmental territory may be  
79 induced by TFs deploying different DNA-binding dynamics in between seemingly

80 equipotent cells, despite the existence of very similar concentrations (i.e. low  
81 variability). For example, studies on the Oct4 TF in early mouse embryos have  
82 shown that differential kinetic behavior of DNA binding, despite equal Oct4  
83 concentration among blastomeres, ultimately dictates an early developmental bias  
84 towards lineage segregation (Kaur et al., 2013; Plachta et al., 2011).

85         So far, variation studies have focused predominantly on monitoring the noise  
86 of mRNA production and have dealt almost exclusively with early embryonic  
87 patterning TFs and morphogen gradients (Holloway et al., 2011; Holloway and  
88 Spirov, 2015; Little et al., 2013; Lucas et al., 2013; Pare et al., 2009). Little  
89 information exists about TF variability at the protein level within a tissue, since  
90 studies of this sort would require single-molecule sensitivity. Even more importantly,  
91 proteins need to be quantified at endogenous levels (Lo et al., 2015).

92         High sensitivity methods for quantification of proteins of low intracellular  
93 abundance, like TFs (Kim et al., 2009; Vaquerizas et al., 2009) usually rely on  
94 proteomic analyses based on mass spectrometry. Despite the validity of these  
95 methodologies and their evolution to acquire higher accuracy (Brun et al., 2007) and  
96 resolution (Hanke et al., 2008), they are inappropriate for studies of variability among  
97 cells in the same tissue. They additionally cannot reach the level of single-molecule  
98 detection and, most importantly, they cannot be easily applied in developing tissues  
99 or cells.

100         We have previously used methods with single-molecule sensitivity,  
101 Fluorescence Microscopy Imaging and FCS, to study Hox TF interactions with  
102 nuclear DNA in living salivary gland cells (Papadopoulos et al., 2015; Vukojevic et  
103 al., 2010). FCS has been instrumental for quantification of TF dynamics in living cells  
104 or tissue in several recent studies (Clark et al., 2016; Kaur et al., 2013; Lam et al.,



105 2012; Mistri et al., 2015; Papadopoulos et al., 2015; Perez-Camps et al., 2016;  
106 Szaloki et al., 2015; Tiwari et al., 2013; Tsutsumi et al., 2016). Yet, in these studies,  
107 measured protein mobility in overexpressing systems, rather than molecular  
108 numbers at endogenous levels.

109         Recent progress in *Drosophila* genome engineering led to the establishment  
110 of genome-scale resources of endogenously-tagged proteins, modified at the  
111 endogenous loci, or by addition of a tagged third copy allele within large genomic  
112 fragments (Buszczak et al., 2007; Ejsmont et al., 2011; Ejsmont et al., 2009; Kelso et  
113 al., 2004; Morin et al., 2001; Quinones-Coello et al., 2007; Sarov et al., 2016;  
114 Venken et al., 2011). These transgenic collections enable, for the first time,  
115 systematic studies of TF protein dynamics *in vivo* at endogenous levels, using  
116 methods with single-molecule sensitivity.

117         In this study, we take advantage of the availability of fly toolkits, in which TFs  
118 have been endogenously tagged by different methodologies (6 fosmid lines, 6 BAC  
119 lines, 1 FlyTrap line and 1 MiMIC line), to measure the intranuclear concentration of  
120 various TFs *in vivo* by FCS, and their cell-to-cell variability in several fly imaginal  
121 discs. The imaginal discs are flat single-layer epithelia comprised of small diploid  
122 cells and many TFs are expressed in defined regions within these tissues during  
123 development. These TFs were selected on the basis of the following criteria: a)  
124 availability of an endogenously-tagged line, b) well characterized expression patterns  
125 in imaginal discs, c) representation of most major imaginal discs in our dataset (wing,  
126 leg, eye, antennal, genital discs, and also salivary glands) and d) ability to readily  
127 visualize them using a standard confocal microscopy setup. Our study identifies Antp  
128 as a TF displaying notably lower variability among neighboring cells at the level of

129 protein concentration compared to other TFs and uncovers a mechanism that  
130 controls Antp concentration and variation in developing discs.

131

## 132 **Results**

133

### 134 Characterization of average protein concentrations and cell-to-cell variability of 14

#### 135 Drosophila TFs

136 Average concentrations of TFs in neighboring nuclei of third instar imaginal  
137 discs were measured by FCS (Figure 1). FCS measurements were preferentially  
138 performed in the domains of highest expression in the discs (Figure 1 A-P, white  
139 arrows) and have sampled adjacent cell nuclei within these domains. Temporal  
140 autocorrelation curves differed among TFs in their amplitude (Figure 1Q),  
141 characteristic decay times and the relative contribution of the slow component  
142 (Figure 1R). They were fitted with a two-component model of free three-dimensional  
143 diffusion and triplet formation (Supplement 1) and interpreted as described in detail  
144 in our previous study (Vukojevic et al., 2010). Differences in average concentrations  
145 ranging about two orders of magnitude among different TFs, from  $\sim 30$  nM to  
146  $\sim 1.1$   $\mu$ M (see Supplement 2 for the calculation) were observed.

147 FCS analysis of inter-nuclear variability in TF concentration among adjacent  
148 nuclei (Figure 2) showed that variation, expressed as variance over squared mean  
149 ( $CV^2 = \frac{s^2}{m^2}$ ), ranges from  $\sim 7$  to  $\sim 53\%$  (Figure 2 A). We also examined the protein  
150 Fano factor values of this dataset (expressed as variance over the mean,  $F_f = \frac{s^2}{m}$ )  
151 and obtained values ranging from  $\sim 0$  to  $\sim 20$  (Figure 2 A'), in line with previous  
152 observations (Sanchez et al., 2011). To evaluate a possible relation of variation to

153 concentration among different TFs, we plotted the variation as a function of average  
154 TF concentration (Figure 2 B). We observed elevated levels of variation ( $CV^2 > 0.2$ )  
155 for most TFs, and the variation decreased with increasing average concentrations for  
156 all TFs (Newman et al., 2006; Schwanhausser et al., 2011; Taniguchi et al., 2010).  
157 But, we also noted that Antp displayed lower variation values for its measured  
158 average concentration ( $CV^2 < 0.2$ ), as compared to the other TFs in our dataset  
159 (Figure 2 A and B). This distinction prompted us to further examine variation values  
160 for average endogenous Antp concentrations among neighboring cells in a collection  
161 of cell clusters in the wing and leg discs (Figure 2 C). We observed that the variation  
162 decreased steeply with increasing Antp concentration (Figure 2 C), whereas the  
163 protein Fano factor increased (Figure 2 C'). This behavior, which is usually indicative  
164 of complex regulatory processes at the transcriptional level (Franz et al., 2011;  
165 Smolander et al., 2011), led us to further investigate the regulation of Antp  
166 transcription genetically.

167

#### 168 Control of Antp concentration by auto-repression

169 We started investigating possible regulatory mechanisms of Antp abundance  
170 in imaginal discs by examining whether Antp is able to control its own levels (auto-  
171 regulation). To do this, we first established that the Antp-eGFP MiMIC line, used in  
172 our FCS measurements, represents a functional *Antp* allele. This fly strain has been  
173 generated by conversion of the MiMIC insertion MI02272 to a protein trap insert  
174 (Venken et al., 2011). Since critical domains for Antp function, such as the  
175 homeodomain and YPWM motif, are not interrupted by the introduction of the eGFP  
176 artificial exon (Figure 3 – figure supplement 1), we reasoned that the protein should  
177 retain a great portion of its full functionality *in vivo*. This is indeed the case for

178 synthetic Antp (SynthAntp) peptides lacking the long non-conserved N terminus of  
179 the protein, which we have functionally investigated previously (Papadopoulos et al.,  
180 2011). In fact, flies bearing the MI02272-eGFP protein trap are homozygous viable  
181 with adult escapers and only partial lethality at the pupal stage. Because *Antp* mRNA  
182 is not maternally deposited, this indicates that at least the embryonic, larval and  
183 pupal functions of *Antp* are retained in the Antp-eGFP fusion construct. To  
184 investigate whether the Antp-eGFP pattern truly reflects the expected Antp protein  
185 distribution, we performed immunostainings of the embryonic ventral nervous system  
186 and all thoracic imaginal discs (pro-, meso- and metathoracic leg, wing, haltere and  
187 humeral discs) of wild type and heterozygous Antp-eGFP larvae. We observed that  
188 the Antp-eGFP fusion protein recapitulates the endogenous *Antp* expression pattern  
189 (prominent colocalization of eGFP and Antp, Figure 3 – figure supplement 2). The  
190 expression patterns are similar to the ones observed for *Antp* mRNA, reporter  
191 constructs and protein (Engstrom et al., 1992; Levine et al., 1983; Wirz et al., 1986)  
192 in third instar imaginal discs. Together, this data support the notion that Antp function  
193 is unaltered in Antp-eGFP MiMIC flies.

194 In order to address whether Antp is able to auto-regulate its own protein  
195 levels, we monitored the concentration of endogenous Antp protein upon  
196 overexpression of *Antp*. To distinguish between overexpressed and endogenous  
197 protein, we used SynthAntp transgenes fused to eGFP (SynthAntp-eGFP). These  
198 transgenes encode the region between the YPWM motif of Antp and its C terminus  
199 (but lack the long and non-conserved N terminus of the protein, against which Antp  
200 antibodies have been raised). Importantly, their Antp-specific homeotic function has  
201 been validated previously (Papadopoulos et al., 2011). Clonal overexpression of

202 *SynthAntp-eGFP* in the wing disc (Figure 3A-C') repressed the endogenous Antp  
203 protein, indicating that Antp is indeed able to regulate its own protein levels.

204

205 Antp protein can repress *Antp* gene expression at the transcriptional level

206 We then asked whether this repression occurs at the transcriptional level. To  
207 address this we used a previously characterized reporter of the *Antp* P1 promoter,  
208 *Antp* P1-*lacZ* (Zink et al., 1991), containing 17.2 kb of the P1 promoter and the first  
209 intron of *Antp* (see Materials and Methods). This reporter has been shown to  
210 recapitulate the expression pattern of the *Antp* mRNA from the P1 promoter  
211 ((Engstrom et al., 1992; Zink et al., 1991) and unpublished results). We induced  
212 overexpression clones of SynthAntp-eGFP in the wing disc and observed that *Antp*  
213 *lacZ*-reporter is repressed in the clones (Figure 3D-F). The auto-repressive capacity  
214 of Antp was also validated for all leg discs where *Antp* is strongly expressed (pro-,  
215 meso-, and metathoracic leg discs), using SynthAntp-eGFP and three other Gal4  
216 drivers, *Distal-less- (Dll)*, *patched- (ptc)* and *69B-Gal4* (Figure 3 – figure supplement  
217 3).

218 In order to rule out that the observed repression is due to putative dominant  
219 negative activity of SynthAntp-eGFP, we repeated the experiment in overexpression  
220 clones of the full-length untagged Antp protein that is functionally equivalent to the  
221 endogenous Antp. Nevertheless, similarly to SynthAntp-eGFP, we observed  
222 repression of the *Antp* reporter (Figure 3G-I'), suggesting that the transcriptional  
223 auto-repressive capacity of Antp is not caused by dominant negative effects of the  
224 minimal *Antp* transgene.

225 Without excluding additional post-transcriptional mechanisms of auto-  
226 repression and with no major Antp auto-regulatory capacity having been identified

227 using a P2 promoter reporter (data not shown) (Engstrom et al., 1992; Zink et al.,  
228 1991), our results provide evidence that Antp is able to repress itself from the P1  
229 promoter at the transcriptional level.

230

### 231 Antp protein is able to activate *Antp* gene transcription in imaginal discs

232 Antp auto-repression capacity offered a plausible explanation for the observed  
233 low variation in Antp protein concentration among third instar cell nuclei. However,  
234 overexpression of *SynthAntp-eGFP* from the *Distal-less (Dll)* (MD23) enhancer  
235 surprisingly resulted in ectopic activation of the *Antp* P1 reporter in distal  
236 compartments of third instar discs, where Antp is normally not detected, such as the  
237 wing pouch and the distal portion of the antennal disc (Figure 3 J-M, O-R and eGFP  
238 controls in N, S and T-V). This finding is opposite to the aforementioned auto-  
239 repressive function of Antp and suggested a role in transcriptional auto-activation.

240 Importantly, the MD23 *Dll-Gal4* driver used is not a homozygous viable line  
241 and the Dll TF is itself a repressor of *Antp* during disc development (Emerald and  
242 Cohen, 2004). Therefore, to preclude that the observed P1 activation is due to a Dll  
243 sensitized background, we induced *Dll RNAi*-knockdown clones and confirmed that  
244 the absence of Dll is not sufficient to induce *Antp* ectopic expression or alter its  
245 capacity to repress in the endogenous expression domain (Figure 3 – figure  
246 supplement 4).

247 We conclude that, in addition to its capacity to repress, Antp is also able to  
248 activate its own transcription.

249

250 A temporal switch controls the transition of *Antp* from a state of auto-activation to a  
251 state of auto-repression

252 We reasoned that, since endogenous *Antp* were able to control its own  
253 expression both positively and negatively, this is likely to occur in a temporally  
254 resolved manner. To investigate whether auto-regulation of *Antp* is temporally  
255 controlled in development, we induced overexpression clones of full-length untagged  
256 *Antp* either at 26 h (early – first larval instar) or at 60 h (late – second larval instar) of  
257 development and harvested third instar wandering stage larvae for analysis (Figure 4  
258 A). Endogenous *Antp* protein was monitored by means of eGFP visualization of the  
259 MiMIC allele. Induction of clonal overexpression of untagged *Antp* in discs early in  
260 development, just after embryonic hatching (first instar), displayed strong ectopic  
261 activation of *Antp*-eGFP (Figure 4 B-D). Notably, in the case of early-induced clones  
262 with auto-activation readout, we found no indication of concurrent repression of *Antp*  
263 within its normal expression domain (dashed red line in Figure 4 E and G). Rather,  
264 we observed only *Antp* activation throughout the disc, even in the *Antp* normal  
265 expression domain. We also confirmed that early auto-activation of *Antp* takes place  
266 at the transcriptional level (Figure 4 – figure supplement 1). In contrast,  
267 overexpression clones induced during the late second instar stage repressed *Antp*-  
268 eGFP (Figure 4 H-J).

269 Together, these results clearly pointed to the existence of a switch in *Antp*  
270 auto-regulatory capacity on its own transcription during development. Starting from a  
271 preferentially auto-activating state, it changes into an auto-inhibitory one, at later  
272 developmental stages. They also suggested that there is no major temporal overlap  
273 between auto-activation and auto-repression.

274

275 *Antp* is required for activation and repression of *Antp* gene transcription during  
276 development

277 Clonal overexpression experiments provided useful insight as to the ability  
278 (i.e. the sufficiency) of *Antp* protein to display opposing regulatory effects on its own  
279 transcription during development. We next sought to confirm that the changes in  
280 *Antp* expression actually require *Antp* protein, and thereby validate the auto-  
281 regulatory loop. To this end, we first established that *Antp* can be efficiently knocked  
282 down clonally in the wing disc by monitoring the repression of the MiMIC-derived  
283 *Antp*-eGFP protein (Figure 4 K-L'). Then, we induced early *Antp RNAi*-knockdown  
284 clones, monitored the activity of the *Antp* P1 reporter and found its expression to be  
285 efficiently decreased (Figure 4 M-N' and eGFP controls in Q-R'). This result is in  
286 agreement with the results from early clonal overexpression of the full-length protein,  
287 which rather triggers activation of *Antp* P1 transcription (Figure 4 B-G and Figure 4 –  
288 figure supplement 1). We conclude that *Antp* is required for sustaining its own  
289 expression, confirming the existence of an *Antp* auto-regulatory loop.

290 Conversely, we found that, when *Antp* was clonally down-regulated by *RNAi*  
291 at later developmental time points (Figure 4 A), the transcription of the reporter was  
292 rather up-regulated in the knockdown clones (Figure 4 O and P). Again, this result is  
293 in agreement with the corresponding over-expression experiments, which resulted in  
294 repression of *Antp* protein and transcripts (Figure 3 A-I', 4 B-D and Figure 3 – figure  
295 supplement 3). Hence, next to *Antp* being sufficient, we have shown that it is also  
296 required for both repression and activation of *Antp* P1 transcription in thoracic  
297 imaginal discs. Thus, normal patterns of *Antp* expression require both auto-activation  
298 and auto-repression.

299

300 Direct correlation between *Antp* concentration and homeotic function



301 With Antp having been identified to possess opposing roles on the regulation  
302 of its transcription and the observation of prominent auto-activation in some  
303 overexpression assays (Figure 3 J-V and Figure 4 – figure supplement 1), but no  
304 obvious auto-activation in others (Figure 3 – figure supplement 3), we reasoned that  
305 these differences might be due to a) changes in concentration (i.e. auto-repression  
306 and auto-activation might occur at different concentrations of Antp) and b)  
307 differences in DNA-binding affinities associated with activation and repression.

308 To examine the effect of concentration on Antp function, we expressed the  
309 same *SynthAntp-eGFP* construct in the antennal disc, using four different Gal4 driver  
310 lines, *Dll* (MD23)-, *ptc*-, *Dll*- (MD713)- and *69B*-Gal4. We monitored the  
311 concentration of SynthAntp-eGFP by imaging (Figure 5 A-D) and FCS (Figure 5 I  
312 and I'), while also assessing its capacity to induce homeotic transformations in the  
313 antenna (Figure 5 E-H). We found that the *Dll* (MD23) line is indeed the strongest  
314 driver among the four (Figure 5 A). It caused complete transformations of the distal  
315 antennal segments into a tarsus (Figure 5 E), whereas the remaining Gal4 drivers all  
316 induced transformations to different extents, progressively weaker for decreasing  
317 concentrations (Figure 5 B-D and F-H). The concentration range between the  
318 strongest and weakest Gal4 driver was more than eightfold (Figure 5 A-D, I and I').  
319 FCS analysis also showed that, within the experimental error of our measurements,  
320 there were no differences among Antp FCS measurements upon induction by *ptc*-  
321 Gal4, *Dll*-Gal4 and *69B*-Gal4 (Figure 5 J), as evident from the overlap of the  
322 temporal autocorrelation curves shown in Figure 5 I after their normalization to the  
323 same amplitude,  $G_n(\tau) = 1$  at  $\tau = 10 \mu\text{s}$  (Figure 5 J). This indicated that Antp DNA-  
324 binding behavior is not altered by overexpression.

325 Taken together, these results show that different Gal4 drivers yield highly  
326 different concentrations of overexpressed Antp (Figure 5 I and I'). Moreover, the  
327 homeotic activity of Antp readily depends on, and directly correlates with, the  
328 concentration triggered by ectopic activation (Figure 5 E-H).

329

### 330 Antp can repress and activate its transcription at endogenous concentrations

331 If Antp auto-activation is readily observed only in conditions of very high  
332 overexpression ( $3.8 \mu M$ ), more than 7 times higher than the average endogenous  
333 concentration of Antp-eGFP in the wing disc measured by FCS ( $0.5 \mu M$ , Figure 1 K  
334 and Q, light grey autocorrelation curves), it is possible that Antp auto-repression and  
335 auto-activation do not occur at all at physiological Antp concentrations. To analyze  
336 whether this is the case, we carefully examined the capacity of Antp to repress and  
337 ectopically activate its own expression using the *69B*-Gal4 driver. This line triggered  
338 concentrations of overexpressed Antp of  $473 nM$  in average (Figure 5 D), similar to  
339 endogenous Antp levels ( $501 nM$ , Figure 1 K and Q). We confirmed that in the wing  
340 disc, endogenous Antp protein is repressed at the base of the wing blade, when it is  
341 co-expressed with the *69B*-Gal4-driven SynthAntp (Figure 5 K-L, negative controls in  
342 M-N and Figure 3 – figure supplement 3). However, we did not observe any ectopic  
343 *Antp* P1 reporter activation caused by *69B*-Gal4-mediated overexpression using  
344 antibody staining against  $\beta$ -galactosidase (Figure 3 – figure supplement 3 and Figure  
345 3 – figure supplement 4, E-F'). By performing more sensitive X-gal stainings of *Antp*  
346 P1-lacZ activity however, we detected weak but definite induction of *Antp* P1  
347 expression in the antennal disc (Figure 5 O and negative control in P). We also  
348 confirmed the ability of the remaining two Gal4 drivers (the MD713 *Dll*-Gal4 and *ptc*-  
349 Gal4) to activate *Antp* transcription ectopically (Figure 5 – figure supplement 1). We

350 conclude that Antp is able to repress and activate its own transcription at  
351 physiologically relevant concentrations, comparable to its normal concentration in the  
352 wing disc. Moreover, our data suggest that, for equal Antp concentrations, auto-  
353 repression is a more efficient process than auto-activation.

354

355 Antp switches from a low-concentration/high-variation to a high-concentration/low-  
356 variation state

357 The *Antp* gene is able to switch between states of auto-activation and auto-  
358 repression and it is likely that the auto-repressive state limits the variation of Antp  
359 protein concentration among neighboring cells late in development, in third instar  
360 imaginal discs. If so, variation would be higher during earlier stages, when auto-  
361 repression does not operate. To test this hypothesis, we monitored the endogenous  
362 expression levels and cell-to-cell variation of Antp nuclear concentration in second  
363 instar wing and leg discs by FCS, using the Antp-eGFP MiMIC allele (Figure 6 A-D).  
364 We observed significantly lower average concentrations of Antp protein in both  
365 second instar wing and leg discs, as compared to their third instar counterparts  
366 (Figure 6 C and D, compare the amplitudes of the average autocorrelation curves –  
367 the amplitude is inversely proportional to the number of molecules). This indicates  
368 that endogenous Antp concentration changes from second to third instar in thoracic  
369 discs (Figure 6 C). Importantly, variation in concentration among neighboring nuclei  
370 in second instar discs was roughly double compared to third instar discs (Figure 6  
371 C), indicating that the increase in concentration is accompanied by a suppression of  
372 concentration variability.

373 FCS measurements were performed either on endogenous Antp in second  
374 and third instar wing and leg discs (Figure 6 D and E); or on endogenous and

375 overexpressed Antp in the wing and antennal discs, respectively (Figure 6 F and G).  
376 Temporal autocorrelation curves recorded in third instar discs, when normalized to  
377 the same amplitude,  $G_n(\tau) = 1$  at  $\tau = 10 \mu s$  (Figure 6 E), displayed a notable shift  
378 towards longer characteristic times, as compared to measurements performed in  
379 second instar discs. Fitting of the autocorrelation curves (see Supplement 1 for  
380 details) identified two average characteristic decay times,  $\tau_1 = (800 \pm 400) \mu s$  and  
381  $\tau_2^{2nd\ instar} = (100 \pm 150) ms$ , whereas in the third instar average  $\tau_2$  was found to be  
382 significantly longer,  $\tau_2^{3rd\ instar} = (250 \pm 250) ms$  (Student's two-tailed t-test,  
383  $p = 3 \cdot 10^{-7}$ ). This observation indicates that endogenous Antp is initially fast moving  
384 in the nucleus and participates in considerably fewer interactions with the DNA.  
385 However, in later discs, it appears to display much longer decay times, reflected by  
386 the shift of  $\tau_2$  to longer times, indicating longer-lasting interactions with the DNA. In  
387 contrast, when FCS measurements were compared between endogenous third  
388 instar and overexpressed Antp (Figure 6 F and normalized autocorrelation curves in  
389 G) we found indistinguishable decay times, as evidenced from the overlap of the  
390 normalized temporal autocorrelation curves, despite more than sevenfold  
391 concentration difference ( $0.5 \mu M$ , as compared to  $3.8 \mu M$ ). Fitting of the  
392 autocorrelation curves (see Supplement 1 for details) identified average  $\tau_2^{o/e} =$   
393  $(300 \pm 300) ms$ , similar to the average value obtained from fitting third instar FCS  
394 data (Student's two-tailed t-test,  $p = 3.3 \cdot 10^{-1}$ ). Moreover, the characteristic decay  
395 times were found to be independent of the concentration of Antp-eGFP over the  
396 whole concentration range examined (Figure 6 – figure supplement 1, A and B),  
397 showing that the underlying fluorescence intensity fluctuations are generated by  
398 diffusion.

399 Our results show that *Antp* starts being expressed at relatively low and highly  
400 variable levels in early developing discs, and with the capacity to auto-activate its  
401 own transcription. Later in development, it reaches a state of higher average  
402 concentrations and considerably lower variation between neighboring cells.

403

#### 404 Calculation of the endogenous apparent dissociation constant of Antp from FCS 405 measurements

406 With concentration of Antp not being sufficient to explain the observed  
407 differences in Antp dynamics in the second and the third instar leg and wing discs  
408 (compare Figure 6 E with G), we sought to investigate the underlying differences at  
409 the level of Antp-DNA binding.

410 Live imaging of Antp-eGFP in the wing disc (Figure 6 H and I) revealed that  
411 Antp is not evenly localized in cell nuclei, it is excluded from the nucleoli and forms  
412 bright sites of accumulation in different nuclear compartments (Figure 6 K and L).  
413 These are presumably sites of pronounced DNA-binding and transcriptional  
414 regulation. Taking advantage of the variation in Antp-eGFP concentration among  
415 wing disc nuclei, we constructed DNA-binding curves and calculated the apparent  
416 endogenous dissociation constant for Antp in third instar discs (Figure 6 M). We  
417 observed that the fraction of DNA-bound Antp, which is reflected by the relative  
418 amplitude of the slow component measured by FCS, scales linearly with the total  
419 amount of TF (Figure 6 M and Figure 6 – figure supplement 1, A), yielding the  
420 following regression equation:  $y = 0.38x - 5.78$ . Using the previously described  
421 simple two-step model of TF-DNA binding, in which non-specific interactions are  
422 faster and precede the specific interactions (Vukojevic et al., 2010), we have  
423 calculated the endogenous apparent dissociation constant for specific third instar

424 Antp binding to nuclear DNA to be  $K_{d, Antp}^{3rd\ instar} = 18\ nM$ , (see Supplement 3 for the  
425 calculation of the specific dissociation constant and Supplement 4 for the  
426 approximation of the number and concentration of specific binding sites for Antp).  
427 Importantly, we arrived at a very similar value of the apparent dissociation constant,  
428 when it was calculated from the sum of FCS measurements on third instar  
429 endogenous and overexpressed Antp (Figure 6 H-J, 209 measurements), namely  
430  $K_{d, Antp}^{endog.+o/e} = 15\ nM$  (Figure 6 N and Figure 6 – figure supplement 2, B, regression  
431 equation:  $y = 0.46x - 7.29$ , see Supplement 5 for the calculation). Fluorescence  
432 Recovery After Photobleaching (FRAP) analysis (Figure 6 – figure supplement 1, C)  
433 showed that the dissociation rate of specific Antp-DNA complexes is low ( $k_{off}^{specific} <$   
434  $3 \cdot 10^{-3}\ s^{-1}$ ). Together, FCS and FRAP measurements indicate that Antp binds with  
435 high affinity to its specific binding sites in third instar disc cells (Figure 6 – figure  
436 supplement 1, C), as evidenced from the apparent dissociation constant that is in the  
437 order of  $10\ nM$ . In contrast, the dissociation constant calculated from FCS  
438 measurements performed in second instar discs was  $K_{d, Antp}^{2nd\ instar} = 131\ nM$  (Figure 6  
439 N and Figure 6 – figure supplement 2, C, regression equation:  $y = 0.44x - 2.6$ , see  
440 Supplement 6 for the calculation), indicating considerably lower affinity of Antp  
441 binding to the DNA in early discs.

442 We conclude that Antp binding behavior to the DNA changes from second to  
443 third instar discs, transitioning from a state of low affinity to a state of stronger  
444 binding on the DNA.

445

#### 446 Dynamic control of Antp auto-regulation by different Antp isoforms

447 The changing binding behavior of Antp on DNA from second to third instar  
448 discs and the developmental transition from an auto-activating to an auto-repressing

449 state suggested a causal relationship between the two parameters. However, it  
450 provided no explanation as to how this could be regulated molecularly. We,  
451 therefore, sought to identify additional regulatory mechanisms that could link the  
452 observed differences in DNA-binding affinities to Antp auto-activation and  
453 repression.

454 We have previously established that the transcriptional activation and  
455 repression capacities of the Antp TF are favored or disfavored by naturally occurring  
456 isoforms differing in as little as four amino acids in the linker between the YPWM  
457 motif and the homeodomain (Papadopoulos et al., 2011). Long linker isoforms (8  
458 amino acids) favor transcriptional activation of Antp target genes, whereas short  
459 linker ones (4 amino acids) favor repression (Figure 7 A). We, therefore, examined  
460 whether the linker length is also responsible for differences in auto-regulation.  
461 Ectopic expression of SynthAntp-eGFP peptides featuring a long linker displayed  
462 significantly weaker repression capacity on endogenous Antp, as compared to their  
463 short linker counterparts (Figure 7 B-E' and quantified in J). This finding indicates  
464 that, also in the case of auto-repression, short linker isoforms function as more  
465 potent repressors. Interestingly, the YPWM motif was found to be to a great extent  
466 dispensable for auto-repression. Constructs bearing mutations of the YPWM motif to  
467 alanines (Figure 7 A) could still repress endogenous Antp (Figure 7 F-I' and  
468 quantified in J). We conclude that different Antp isoforms display differential auto-  
469 repressive capacity and that this function resides in a small C-terminal portion of the  
470 protein, which includes the homeodomain, whereas the long N terminus and the  
471 YPWM motif are dispensable.

472 If Antp auto-repression is differently regulated by short and long linker  
473 isoforms, this may be reflected in the relative abundance of their corresponding

474 mRNA variants. We, therefore, investigated the expression of long and short variants  
475 in thoracic imaginal discs by quantifying their relative abundance. We found that both  
476 transcript variants are expressed from embryonic to third instar development (Figure  
477 7 K). However, a major redistribution of their relative amounts occurs during this  
478 time, starting with excess of long linker transcripts and ending with excess of short  
479 linker ones in third instar wing and leg imaginal discs, in line with previous  
480 observations (Stroeher et al., 1988).

481 With short linker isoforms showing enhanced repressor capacity and long  
482 linker ones showing enhanced activating capacity, our findings suggest that the  
483 switch between auto-activation and auto-repression is controlled at the level of  
484 transcript variant abundance (without excluding additional mechanisms).

485 Relative changes in *Antp* transcript variant concentration, differential  
486 efficiency of their encoding isoforms to repress or activate the *Antp* gene, the  
487 developmental switch of the *Antp* gene from auto-activation to repression and the  
488 different mobilities of *Antp* between second and third instar imaginal discs all point  
489 towards the hypothesis that the two isoforms have different properties in their modes  
490 of interaction with the DNA. To investigate this hypothesis, we expressed the two  
491 isoforms in third instar wing and antennal discs from the *69B* enhancer, which we  
492 established to result in *Antp* concentrations close to (if not below) endogenous levels  
493 (Figure 5 D). We performed FCS measurements, sampling cells with similar  
494 expression levels of short or long linker *Antp-eGFP* isoforms (Figure 7 I'). We  
495 observed that the short linker isoform displayed shorter characteristic decay times,  
496 as evidenced by the shift of average temporal autocorrelation curves towards longer  
497 characteristic decay times and the higher relative contribution of the second  
498 component as evident from its increased relative amplitude (Figure 7 L'). Similar to



499 our comparative analysis between second and third instar discs (Figure 6 D and E),  
500 this finding indicates that the short linker isoform binds to the DNA with considerably  
501 higher affinity than its long linker counterpart. Plotting the fraction of the slow FCS  
502 component (reflecting the DNA-bound fraction of Antp), as a function of the total  
503 Antp concentration (as in Figure 6 M-O) allowed us to calculate the apparent  
504 equilibrium dissociation constants for the two isoforms (see Supplement 7 for the  
505 calculation) to be  $K_{d, Antp}^{short linker isoform} = 18nM$  (Figure 7 M and Figure 7 – figure  
506 supplement 1, D, regression equation:  $y = 0.34x - 5.31$ ) and  $K_{d, Antp}^{long linker isoform} =$   
507  $190nM$  (Figure 7 N and Figure 7 – figure supplement 1, E, regression equation:  
508  $y = 0.24x - 3.28$ ). The tenfold difference in the dissociation constants indicates a  
509 tenfold higher binding affinity of the short linker isoform on the DNA, in line with our  
510 observations during the developmental transition from second to third instar discs  
511 (Figure 6 M-O).

512 Taken together, our experiments on endogenous and synthetic Antp and on  
513 short and long linker variants indicate that differences during disc development can  
514 be largely attributed to differences in the affinity of the investigated isoforms.

515 We have also addressed the efficiency of short and long linker variants in  
516 Antp auto-activation during early stages (in the embryo) (Figure 7 – figure  
517 supplement 2) and found that the long linker isoform displayed stronger activation  
518 capacity of the *Antp* P1 reporter than its short linker equivalent, but no ectopic  
519 activation was observed upon mutation of the YPWM motif (Figure 7 – figure  
520 supplement 2).

521 Taken together, the switch of Antp from an auto-activating to an auto-  
522 repressive state and the alteration of its DNA-binding behavior during disc  
523 development can be largely explained by a developmental regulatory shift in the

524 relative concentrations of preferentially activating and repressing Antp isoforms,  
525 which themselves display distinct properties in their modes of interaction with the  
526 DNA.

527

## 528 **Discussion**

529 In this work, we have characterized the endogenous molecular numbers  
530 (concentration) and cell-to-cell variation in the concentration of 14 *Drosophila* TFs in  
531 imaginal discs. With single-point FCS being routinely used for measurements of the  
532 concentration of fluorescent molecules and their dynamics in live cells, and with  
533 novel FCS methodology for larger scale measurements across a whole tissue or  
534 animal constantly emerging (Krieger et al., 2015; Papadopoulos et al., 2015), we  
535 expect that the study of variation in protein levels will become readily accessible,  
536 complementing the established methods to quantify mRNA variation.

537 We focused our in-depth mechanistic study on Antp and our findings are  
538 summarized in Figure 8. *Antp* is initially expressed in thoracic imaginal discs,  
539 producing (at least) two functionally distinct isoforms, one being a preferentially auto-  
540 activating and the other a preferentially auto-repressing species. The two isoforms  
541 differ in the mode of interactions they undergo with the DNA, as well as their affinities  
542 of DNA-binding, with the activating isoform characterized by low binding affinity and  
543 the repressing isoform showing higher binding affinity on the DNA. The differences in  
544 affinities between the two isoforms could be owed to a) *trans* modifications (one  
545 isoform being a more efficient DNA-binder than the other), or b) to *cis* modifications  
546 of the corresponding DNA-binding sites at the chromatin level (binding sites being  
547 more receptive to binding by one Antp isoform and not the other). Moreover, the two  
548 isoforms appear to be initially present in the nuclei in unequal concentrations (higher

549 concentration of the activating isoform). For simplicity, the binding of Antp isoforms  
550 to the Antp promoter is depicted as direct, although an indirect mechanism, involving  
551 induction or repression of intermediate genes, is also possible. Moreover, binding  
552 sites of activating or repressing isoforms may or may not be the same. The  
553 aforementioned state is characterized by overall low average concentrations of Antp  
554 and high variability of total concentration among neighboring cells. High variation in  
555 endogenous Antp protein concentration suggests a high level of transcriptional noise  
556 introduced in the regulation of Antp target genes. In fact, it has been well established  
557 that increased affinity of TF binding to its target sites readily increases transcriptional  
558 noise (Dadiani et al., 2013; Shimoga et al., 2013; Suter et al., 2011).

559 With *Antp* transcription being induced in the majority of the cells (without  
560 ruling out repression in some of them), the total amount of TF increases and (by  
561 means of an unknown regulatory mechanism) the relative distribution of  
562 preferentially activating and repressing Antp species is progressively shifted towards  
563 the production of more repressing isoforms. Therefore, above a certain concentration  
564 threshold, the Antp promoter gradually switches from an activated configuration to a  
565 repressed one, as development proceeds. Because this switch is concentration-  
566 dependent, it results in higher homogeneity of Antp concentration among cells.  
567 Therefore, variation becomes progressively suppressed.

568 The gradual repression of *Antp* at the transcriptional level provides a plausible  
569 explanation for the measured high variation in concentration at early, and the low  
570 variation at later, stages. At the same time, our measurements suggest that no  
571 steady state in Antp concentration has been reached until, at least, early third instar  
572 development. With the repressor isoforms displaying stronger and longer-lasting

573 binding to the DNA, this state persists, allowing the control of variation, while  
574 maintaining Antp at desired levels.

575 Taken together, our quantitative measurements of protein concentrations,  
576 cell-to-cell variation, DNA-binding affinities and differential regulatory capacities of  
577 isoforms suggest a simple qualitative model of auto-regulation in the *Antp* locus. This  
578 model should explain how Antp transits from an initial state of low concentration/high  
579 variation to a state of high concentration/low variation. Future experiments, in  
580 combination with quantitative stochastic modeling, will test whether the proposed  
581 model is indeed sufficient to explain the establishment of a stable, high  
582 concentration/low variation state of a TF such as Antp.

583 Is Antp maintenance required for proper development of thoracic discs? In our  
584 overexpression experiments in leg and wing discs, we showed that increased Antp  
585 concentration during disc development leads to loss of Antp transcripts and protein,  
586 which is normally expressed in defined domains throughout disc development.  
587 Despite this, flies strongly overexpressing SynthAntp by Dll-Gal4 (MD23) are viable  
588 and fertile and can be kept as a stock. The lack of adult Antp loss-of-function  
589 phenotypes (due to repression of endogenous *Antp*) in flies strongly overexpressing  
590 SynthAntp requires explanation. One possibility is that Antp function is dispensable  
591 during late disc development. A second possibility is that, despite repression of the  
592 endogenous *Antp* gene, *SynthAntp* rescues its function. We addressed this question  
593 and found that SynthAntp can indeed compensate to a great extent for repression of  
594 endogenous Antp (Figure 8 – figure supplement 1). Our results indicate that Antp  
595 maintenance is required for normal leg and notum development and suggest that  
596 endogenous auto-repression within the *Antp* normal expression domains is in fact an

597 inefficient process, which takes place upon concentration increase only (for example,  
598 as a cell-autonomous response to increased variation).

599 In our dataset of 14 TFs, we have measured values of variation in TF  
600 concentration ranging from 40% to 60% in imaginal discs and determined their  
601 corresponding protein Fano factor values. Having measured variation of molecular  
602 numbers, the obtained data represent true Fano factor values, devoid of scaling  
603 factors (Raj and van Oudenaarden, 2009; Sanchez et al., 2011). Our study shows  
604 that Fano factors values for all TFs measured are in the range of 0-20, in line with  
605 Fano factor values of other TFs determined previously to lie between 0 and 30  
606 (Sanchez et al., 2011). Moreover, the majority of TFs examined show high Fano  
607 factor values,  $F_f > 1$ , providing strong evidence that transcriptional bursting is likely  
608 to be a significant source of the observed cell-to-cell variability.

609 Contrary to Sens, Fkh and Antp TFs, which displayed  $F_f > 10$ , we also  
610 identified TFs with low Fano factor values, such as Atonal (Ato), Eyeless (Ey) and  
611 Spalt Major (Salm).

612 Ato acts as a differentiation factor for R8 photoreceptor development in the  
613 eye disc and its levels are subject to Notch-Delta signaling and auto-regulation  
614 (Baker et al., 1996; Jarman et al., 1995). This mechanism might be sufficient to  
615 explain the low variation observed.

616 For Ey, no mechanism of auto-regulation has been determined yet, but cells  
617 displaying low or suppressed noise are thought to reside in an undifferentiated state  
618 (Kumar et al., 2014), as assessed for pluripotent stem cells. This view is compatible  
619 with the low variation observed for Ey in undifferentiated eye disc cells (anterior to  
620 the morphogenetic furrow), and the low Fano factor value  $F_f \approx 1$  suggests that the

621 transcription of this gene is likely to be a continuous process that occurs with a  
622 constant probability and according to the statistics of a Poisson process.

623 Interestingly, Salm was the only TF examined for which  $F_f < 1$ . Given that the  
624 distribution of Salm is constrained by the Decapentaplegic (Dpp) signaling pathway  
625 that controls growth and patterning during imaginal disc development (Organista et  
626 al., 2015), it is perhaps not surprising that Salm displays a pattern of occurrence that  
627 is more regular than the randomness associated with a Poisson process.

628 Finally, we have measured  $F_f = 10$  for Sex combs reduced (Scr). This value  
629 is equal to the value measured for *Scr* mRNA transcripts in the embryo (Boettiger  
630 and Levine, 2013; Pare et al., 2009). Quantification of *Scr* mRNA (and also the ones  
631 of *Ubx* and *Deformed (Dfd)*) in stage 11 embryos exhibited a very high degree of  
632 variation (expressed as standard deviation over the mean) among very closely  
633 related cells in the *Scr* expression domain. Although mRNA levels of these TFs may  
634 not necessarily reflect protein concentration, comparison of variation in mRNA levels  
635 and the corresponding variation in protein concentration of a collection of TFs  
636 identified a linear relationship between the two, in a system of simple repression  
637 architecture (Sanchez et al., 2011). Taken together, these findings demonstrate that  
638 some Hox TFs display increased variation, whether at the level of mRNA or protein  
639 concentration, but no generic rule applies (Antp displays comparatively low variation  
640 for its concentration).

641 Our FCS measurements of Antp in diverse tissues, variable concentrations,  
642 different developmental time points using distinct isoforms have allowed us to  
643 calculate the endogenous apparent dissociation constant for specific Antp-DNA  
644 binding to be  $K_d^{3rd\ instar} = 18\ nM$  and the average number of Antp molecules per  
645 nucleus to be roughly 7000. The measured  $K_d$  value is similar to the apparent

646 dissociation constant calculated for Scr in salivary gland cells (Vukojevic et al.,  
647 2010),  $K_{d,S}^{Scr} = 7 \text{ nM}$ . The similarity of the values could be explained by the fact that  
648 these two TFs are, in terms of their homeodomains and hence DNA-binding  
649 properties, the most closely related Hox TFs in flies. Conversely, the roughly  
650 threefold stronger binding of Scr could be explained by the fact that Scr  
651 homodimerizes upon DNA binding, whereas Antp does not (Papadopoulos et al.,  
652 2012). Previous studies examined binding of a recombinant Antp homeodomain  
653 peptide to an 18 base pair DNA probe of the BS2 binding site  
654 (GAGAAAAGCCATTAGAG) of a *ftz* enhancer. These studies derived dissociation  
655 constants in the range of 1 – 2 nM ( $K_d = 1.6 \text{ nM}$ ) (Affolter et al., 1990; Muller et al.,  
656 1988). The tenfold difference between the in vitro binding constant and the apparent  
657 in vivo dissociation constant in the two datasets can be explained by: a) the lack of a  
658 full-length protein in the in vitro binding assay, b) interactions with other proteins in  
659 the densely packed nuclear environment (including, but not limited to, cofactors),  
660 which are not present in the in vitro binding constant, or c) the existence of a  
661 collection of binding sites with different affinities for Antp.

662 We have demonstrated that the relative efficiencies of auto-activation and  
663 repression rely considerably on the type of Antp isoform engaged in the regulation of  
664 the P1 promoter (without excluding additional mechanisms). The size of the linker  
665 between the YPWM motif and the homeodomain is important, with short linker  
666 isoforms behaving as more efficient repressors than their long linker counterparts.  
667 We have previously studied the regulatory capacity (transcriptional activation and  
668 repression) of long and short linker Antp isoforms and found that the long linker ones  
669 behave as more efficient activators, whereas the short linker ones as effective  
670 repressors (Papadopoulos et al., 2011). The observed efficiencies for auto-activation

671 and repression are in line with our previous findings. Moreover, we have  
672 demonstrated that auto-repression relies on a small portion of the protein, which  
673 contains the homeodomain and its C terminus. The YPWM motif, which binds  
674 cofactors, such as Extradenticle (Exd), is dispensable for auto-repression. Whether  
675 Exd retains some other role in the auto-repression mechanism described remains to  
676 be investigated. In contrast, the YPWM motif is required for at least part of the auto-  
677 activating function of Antp, since mutations of it did not allow auto-activation to take  
678 place, as compared to the wild type TF. Nevertheless, the question remains as to  
679 how the linker size (the three-dimensional spacing between the homeodomain and  
680 the YPWM motif) could establish preferences on transcriptional activation or  
681 repression, even in the absence of a functional YPWM motif (at least for the  
682 repressive function). Our study indicates additional functions of the linker region (or  
683 parts of it), independent of the YPWM motif. These could be due to interactions with  
684 other cofactors or to differential binding affinities of the homeodomain on a subset of  
685 binding sites in the presence of a short or a long amino acid stretch.

686       Throughout this study, we have used the P1 promoter reporter to dissect the  
687 regulatory behavior of Antp on its own expression. The reason for this has been that  
688 P1 expression patterns have been thoroughly characterized previously in imaginal  
689 discs, (Engstrom et al., 1992; Zink et al., 1991) and unpublished results. Whether  
690 additional auto-regulation of Antp occurs also from the proximal P2 promoter in  
691 discs, remains to be examined, but our initial experiments provided negative  
692 evidence of such regulation, taking place in imaginal discs (data not shown). Auto-  
693 activation of the *Antp* P2 promoter has previously been suggested to take place in  
694 the embryonic nervous system and this mechanism has been invoked to explain why  
695 no *Antp* P2 reporter transcription was observed in neuronal cells in *Antp* mutant



696 embryos (Appel and Sakonju, 1993), whereas global auto-regulation of *Hox* gene  
697 complexes has been shown to be in effect also in mammalian limb development  
698 (Sheth et al., 2014). These pieces of evidence suggest evolutionarily conserved  
699 mechanisms for establishing (auto-activation) or limiting (auto-repression) Hox levels  
700 and variation in different developmental contexts. Nevertheless, at least in the case  
701 of the 17.2 kb P1 reporter, for which auto-regulation was shown in imaginal discs  
702 (this study), rigorous *cis*-element analyses should be able to identify relevant  
703 enhancers and silencers responsible for *Antp* auto-regulation. These might well be  
704 the regulatory elements identified to function in S2 cultured cells (Saffman and  
705 Krasnow, 1994; Winslow et al., 1989), although this hypothesis still needs to be  
706 examined.

707         Negative auto-regulation has been identified as a frequently deployed  
708 mechanism for the reduction of noise (cell-to-cell variability) and the increase of  
709 regulatory robustness in various systems (Becskei and Serrano, 2000; Dublanche et  
710 al., 2006; Gronlund et al., 2013; Nevozhay et al., 2009; Shimoga et al., 2013; Thattai  
711 and van Oudenaarden, 2001). Auto-repression has been described for *Ultrabithorax*  
712 (*Ubx*) in haltere specification (Crickmore et al., 2009; Garaulet et al., 2008) or in *Ubx*  
713 promoter regulation in *Drosophila* S2 cells (Krasnow et al., 1989), whereas an auto-  
714 activating mechanism is responsible for the maintenance of *Deformed* expression in  
715 the embryo (Kuziora and McGinnis, 1988). We have established that an auto-  
716 inhibitory mechanism, that is analogous to that of *Ubx*, exists for *Antp*. Similar to our  
717 observations with *Antp*, only a small portion of *Ubx*, containing the homeodomain  
718 and C-terminus, is sufficient to mediate *Ubx* repression (Crickmore et al., 2009).

719

## 720 **Figure legends**

721

722 **Figure 1: Measurement of average concentrations of 14 endogenously-tagged**  
723 **TFs in *Drosophila* imaginal discs by Fluorescence Correlation Spectroscopy**  
724 **(FCS).** (A-P) Fluorescence imaging of TFs, showing their expression pattern in  
725 imaginal discs and the salivary gland. White arrows indicate regions where FCS  
726 measurements of endogenous intra-nuclear concentration were performed and the  
727 average concentrations are given for each TF. Images have been contrasted for  
728 visualization purposes. For the Antp and Grn TFs, both leg and wing imaginal discs  
729 have been used for measurements. Average concentrations of TFs measured in  
730 different cells span a range of two orders of magnitude, from few tens a thousand  
731 nanomolar. (Q) Representative temporal autocorrelation curves of eight TFs,  
732 selected to demonstrate the full span of the concentration range observed. Note that  
733 the amplitude of the autocorrelation curves is inversely proportional to the number of  
734 molecules (concentration). (R) Temporal autocorrelation curves shown in (Q)  
735 normalized to the same amplitude,  $G_n(\tau) = 1$  at  $\tau = 10 \mu s$ . Note that the shift of the  
736 characteristic decay time to higher values, and the increase of the relative amplitude  
737 of the slow component, indicate higher degree of TF binding to the DNA. Scale bars  
738 denote  $100 \mu m$ , unless otherwise indicated.

739

740 **Figure 2: Variation in TF concentration among neighboring nuclei decreases**  
741 **with increasing concentrations.** (A) Characterization of nucleus-to-nucleus  
742 variability among neighboring cells within the same expression domain in imaginal  
743 discs of the 14 TF studied by FCS. Black bars show concentration averages (with  
744 error bars representing 1 standard deviation), whereas grey bars show the variation,  
745 i.e. the squared coefficient of variation (expressed as the variance over the squared

746 mean,  $CV^2 = \frac{s^2}{m^2}$ ). The Antp measurements are color-coded red for easiness of  
747 comparison with (B). (A') Fano factor values ( $F_f = \frac{s^2}{m}$ ) of the 14 TFs for which FCS  
748 measurements were performed range from 0-20. (B) Variation of the 14 TFs as a  
749 function of concentration. In general, variation is elevated ( $CV^2 > 0.2$ ) and  
750 decreases with increasing average TF concentrations. Red squares correspond to  
751 measurements of average Antp variation. As in (A), Antp in the wing, but even more  
752 in the leg, disc displays markedly lower variation for its average concentrations. Error  
753 bars represent 1 standard deviation. (C) Variation in concentration of endogenous  
754 Antp in the leg and wing discs, observed among clusters of neighboring cells, each  
755 displaying different average concentration, is plotted as a function of concentration.  
756 Error bars represent 1 standard deviation. (C') Fano factor values of endogenous  
757 Antp as in (B), plotted as a function of concentration. The Fano factor increases with  
758 increasing Antp concentrations. Error bars indicate 1 standard deviation.

759

760 **Figure 3: Antp is able to repress and activate itself at the transcriptional level.**

761 (A-C') Clonal overexpression of a *SynthAntp-eGFP* construct in the wing disc  
762 represses the endogenous Antp protein. Arrows in (B) indicate a clone induced in the  
763 notum within the *Antp* expression domain and the dashed line shows the area of  
764 repressed Antp. (D-F) Auto-repression of Antp occurs at the transcriptional level.  
765 Induction of *SynthAntp-eGFP*-overexpressing clones, while monitoring *Antp*  
766 transcription by the *Antp* P1-*lacZ* reporter. Arrows indicate clones within the *Antp* P1  
767 reporter expression domain that express *SynthAntp-eGFP* and down-regulate *Antp*  
768 P1-*lacZ*. (G-I') Antp auto-repression is not a dominant loss-of-function phenotype.  
769 Clones expressing un-tagged, full-length *Antp*, labeled by cytoplasmic eGFP (white  
770 arrows) repress transcription of the reporter. (J-L) Expression of *SynthAntp-eGFP* by

771 *Dll*-Gal4 (MD23) results in ectopic activation of *Antp* P1-*lacZ* in the wing disc. Note  
772 the endogenous and ectopic expression of the reporter in (B), indicated by white  
773 arrows. (M) X-gal staining of *Antp* P1 reporter upon *SynthAntp-eGFP* induction  
774 confirms the endogenous and ectopic activity (black arrows) of  $\beta$ -galactosidase in  
775 the distal part of the wing disc. (N) Control X-gal staining of *Antp* P1-*lacZ*. Black  
776 arrows indicate the endogenous expression. (O-Q) Ectopic activation of the reporter  
777 in the distal antennal portion of the eye-antennal disc (white arrow), as in (K). (R) X-  
778 gal staining of antennal discs (black arrows) confirms the results of stainings in (F-  
779 H). (S) Control antennal discs bearing the *Antp* P1 reporter show no transcription in  
780 the eye-antennal disc. (T-V) Stainings of *Antp* P1-*lacZ* in the distal portion of the  
781 wing disc upon expression of cytoplasmic eGFP from the *Dll* enhancer show no  
782 activity of the P1 promoter (negative control). Scale bars denote 100  $\mu$ m.

783

784 Figure 3 – figure supplement 1: Schematic representation of the *Antp*-eGFP  
785 **fusion protein produced by the conversion of the MiMIC MI02272 construct to**  
786 **an artificial exon.** The eGFP-encoding artificial exon is situated in intron 6 of the  
787 mRNA and is spliced in between exons 6 and 7 that correspond to the long and non-  
788 conserved N-terminal coding sequence of the protein, which has little (if any)  
789 function *in vivo* (Papadopoulos et al., 2011), and does not disrupt the homeodomain  
790 or YPWM motif. All features have been drawn to scale.

791

792 Figure 3 – figure supplement 2: *Antp* expression patterns are not altered by the  
793 **MiMIC MI02272 insertion.** Heterozygous flies (embryos and third instar larvae),  
794 examined for their *Antp*-eGFP pattern (detected by an antibody to GFP, green), as  
795 compared to the total amount of *Antp* (expressed by the sum of the MiMIC *Antp*-

796 *eGFP* and the wild type *Antp* loci), detected by an *Antp* antibody (magenta).  
797 Comparisons of the *Antp* pattern in wild type embryos and all thoracic imaginal discs  
798 are provided case-wise in the right panel. In discs, dashed lines approximately  
799 separate the anterior (A) from the posterior (P) domain of the disc. Note the very  
800 high expression of *Antp* in the humeral disc. In the leg discs, *Antp* is expressed most  
801 strongly in the posterior compartment of the prothoracic leg disc, the anterior  
802 compartment of the mesothoracic leg disc and in an abundant pattern in the  
803 metathoracic leg disc. Cyan arrows point to *Antp* positive cells in the second and  
804 third leg discs that are centrally located, as previously shown (Engstrom et al., 1992).  
805 All images represent Z-projections. Scale bars denote 100  $\mu m$ .

806

807 Figure 3 – figure supplement 3: Auto-repression of *Antp*-eGFP in thoracic  
808 **imaginal discs, assessed by different Gal4-drivers.** (Upper panel) Repression of  
809 *Antp*-eGFP in all ventral thoracic discs (leg discs), using *Dll*- and *ptc*-Gal4. eGFP has  
810 been used as a negative control throughout. (Lower panel) Repression of the *Antp*  
811 *P1-lacZ* reporter in the leg disc (exemplified by a prothoracic leg disc), upon  
812 overexpression of a *SynthAntp* from the MD23 *Dll* enhancer. White arrows in the  
813 upper and lower panels point at regions of overlap between the Gal4-driver and the  
814 *Antp* expression domains, where repression is observed (*SynthAntp*) or is not  
815 detected (eGFP). Scale bars denote 100  $\mu m$ .

816

817 Figure 3 – figure supplement 4: *Antp* is able to auto-activate its transcription  
818 **independently of *Dll*.** (A-C') *Antp* repression and ectopic activation in the wing disc  
819 is independent of *Dll*. Clonal overexpression of *SynthAntp*-eGFP in the prescutum  
820 region of the notum, upon knockdown of *Dll* by *RNAi* shows persistence of

821 repression of *Antp* (white arrows), whereas clones in the disc outside of the *Antp*  
822 expression domain, but within the *Dll* expression domain show no ectopic activation  
823 of *Antp* (yellow arrows), precluding that the ectopic activation in Figure 3 (J-M and O-  
824 R) is caused by a *Dll* sensitized background. However, no detectable ectopic  
825 activation is triggered elsewhere in the disc (cyan arrows), as should have been  
826 expected (see text for explanation). (D-E) Clonal overexpression of cytoplasmic  
827 eGFP upon *Dll* knockdown does not interfere with *Antp* expression. Scale bars  
828 denote 100  $\mu$ m.

829

830 **Figure 4: *Antp* is sufficient and required to trigger a developmental switch from**  
831 **transcriptional auto-activation to auto-repression.** (A) Schematic representation  
832 of the experimental setup. Embryos were collected and allowed to develop for 26 h  
833 (early clones) or 60 h (late clones), at which time overexpression clones were  
834 induced. They were then harvested at third instar wandering larval stage for analysis.  
835 (B-D) Early clones, expressing full-length, untagged *Antp*, marked by the absence of  
836 mCherry, reveal strong auto-activation of *Antp-eGFP* expression (red arrows in (B)  
837 and (D)), monitored by the endogenous *Antp-eGFP* protein. (E-G) Close-up of the  
838 notum region of the prescutum where endogenous *Antp-eGFP* is strongly expressed.  
839 Dashed lines in (E) and (G) delineate the region of strong endogenous expression.  
840 Note the absence of repression of the endogenous gene in overexpression clones  
841 within this region at this stage. The whole *Antp* expression domain expresses *Antp-*  
842 *eGFP*, but overexpression clones (sub-regions of absence of mCherry staining)  
843 express *Antp-eGFP* even stronger. (H-J) Late clones overexpressing untagged, full-  
844 length *Antp* repress endogenous *Antp*, (white arrows in (H) and (J)). (K-R') *Antp* is  
845 required for sustaining its own expression (auto-activation) and for limiting its

846 expression levels (auto-repression) during imaginal disc development. (K-L') In  
847 positive control discs, clonal knockdown of *Antp* in the wing disc results in efficient  
848 down-regulation of the *Antp-eGFP* allele. (M-N') Induction of *RNAi* knockdown  
849 clones of *Antp* at 26 h of development (early clonal induction) results in cells lacking  
850 *Antp* P1 reporter expression. (O-P) Induction of *Antp* knockdown clones by *RNAi* at  
851 later stages (i.e. 60 h of development) within its normal expression domain results in  
852 up-regulation of the *Antp* P1 reporter above endogenous levels. In panels K-P,  
853 nuclear mRFP1 marks the cells of *Antp* knockdown by *RNAi*. (Q-R') Representative  
854 control disc, in which clonal overexpression of *eGFP* (following either of the two  
855 clone-induction regimes, at 26 h or 60 h of development) has been induced, and  
856 which results in no reduction or increase of *Antp* protein. Scale bars denote 100  $\mu m$ ,  
857 unless otherwise indicated.

858

859 Figure 4 – figure supplement 1: **Early auto-activation of *Antp* occurs at the**  
860 **transcriptional level.** Early induction (26 h of development) of SynthAntp in the  
861 wing, leg and eye-antennal disc results in strong ectopic activation of the *Antp* P1  
862 reporter. Dashed white lines outline the domains of endogenous expression in the  
863 wing disc, whereas yellow arrows point at clones, which show ectopically activated  
864 *Antp* P1 transcription. Scale bars denote 100  $\mu m$ .

865

866 Figure 5: **Direct correlation between *Antp* concentration and homeotic function**  
867 **– *Antp* auto-repression and activation occurs at endogenous concentrations.**

868 (A-D) Live imaging (one optical section) of SynthAntp-eGFP expressed in the distal  
869 antennal portion of the eye-antennal disc, induced by different Gal4 drivers. The  
870 concentration was measured using FCS and average concentrations are indicated.

871 An eightfold difference was observed between the strong *Dll*-Gal4 driver (MD23) and  
872 weak *69B*-Gal4 driver. (E-H) Transformations of the distal antenna into a tarsus in  
873 adult flies, caused by *SynthAntp-eGFP* overexpression in antennal discs (A-D) The  
874 strength of the transformation correlates with the level of expression from the  
875 different Gal4 drivers. Ectopic tarsi range from complete transformation to milder  
876 transformations of the arista or ectopic leg bristles in the third antennal segment in  
877 (G) and (H), indicated by black arrows. (I-I') Representative temporal autocorrelation  
878 curves in nuclei overexpressing *SynthAntp-eGFP* (I) and comparison between  
879 average concentrations, represented by the number of molecules in the OVE,  
880 obtained using different Gal4 drivers (I'). Note that the amplitude of the  
881 autocorrelation curve is inversely proportional to the concentration. Statistical  
882 significance was determined using a two-tailed Student's T-test (\*\*\*,  $p < 0.001$ ,  
883 namely  $p_{MD23-ptc} = 3.3 \cdot 10^{-3}$ ,  $p_{MD23-MD713} = 7.2 \cdot 10^{-4}$ ,  $p_{MD23-69B} = 6 \cdot 10^{-6}$ ,  
884  $p_{ptc-69B} = 5.8 \cdot 10^{-14}$  and  $p_{MD713-69B} = 3 \cdot 10^{-15}$ ; n.s., non-significant, namely  
885  $p_{ptc-MD713} = 5.9 \cdot 10^{-2}$ ). (J) Temporal autocorrelation curves of measurements in (I)  
886 normalized to the same amplitude,  $G_n(\tau) = 1$  at  $\tau = 10 \mu s$ , show major overlap,  
887 indicating indistinguishable behavior of Antp binding to the DNA across the  
888 concentration range examined (0.5 – 3.8 nM). (K-L) Repression of endogenous Antp  
889 protein upon induction of *SynthAntp-eGFP* in the proximal regions of the wing disc  
890 by *69B*-Gal4. (M-N) No repression is observed upon overexpression of *eGFP*  
891 (negative control). (O) X-gal stainings of the *Antp* P1 reporter show weak but definite  
892 ectopic  $\beta$ -galactosidase activity in the antennal disc (black arrows). (P) Control  
893 stainings of *eGFP* induced by the *69B* enhancer show complete absence of ectopic  
894 reporter transcription. Scale bars denote 100  $\mu m$ , unless otherwise indicated.

895



896 **Figure 5 – figure supplement 1: Ectopic Antp auto-activation correlates with Antp**  
897 **concentration.** (A-D) Ectopic activation of the *Antp* P1 transcriptional reporter upon  
898 expression of *SynthAntp-eGFP* in the pouch region of the wing disc (A-B) and the  
899 antennal portion of the eye-antennal disc (C-D) by the MD713 *Dll*-Gal4 driver. Weak,  
900 but definite ectopic activation is observed. (E-F') Widespread overexpression of  
901 *SynthAntp* from the *69B* enhancer results in repression of endogenous *Antp* in the  
902 proximal thoracic structures of the wing disc (white arrows), but no ectopic activation  
903 is detectable with this assay (see text for explanation). (G-H') Auto-repression of  
904 endogenous *Antp* in the wing disc is detected upon ectopic expression of *SynthAntp*  
905 by *ptc*-Gal4 in the region of overlap between the *ptc* and the *Antp* expression  
906 domains (white arrow in (G')). Additionally, weak auto-activation of *Antp* is detected  
907 along the anterior-posterior margin (cyan arrows in (G')). (I-J') Neither repression nor  
908 activation occur when eGFP alone is induced by *ptc*-Gal4 (negative control). Scale  
909 bars denote 100  $\mu m$ .

910

911 **Figure 6: Antp transitions to a state of higher concentration, lower variation**  
912 **and longer DNA residence times during larval disc development – study of**  
913 **endogenous Antp-DNA binding by FCS.** (A-B) Live imaging of *Antp-eGFP*  
914 expressing nuclei in second instar leg (A) and wing (B) imaginal discs. (C)  
915 Quantification of average concentrations and cell-to-cell variability in protein  
916 concentration among neighboring nuclei in wing and leg, second and third instar,  
917 discs. Black bars denote the average concentration and red bars denote the squared  
918 coefficient of variation in concentration, expressed as the variance over the squared  
919 mean. Note the increase in average concentration from second to third instar  
920 (eleven-fold increase in the leg disc) and the concurrent drop in variation to almost

921 half of its value. Statistical significance was determined using Student's two-tailed T-  
922 test (\*\*\*,  $p < 0.001$ , namely  $p_{3rd-2nd\ instar\ leg} = 4.4 \cdot 10^{-18}$  and  $p_{3rd-2nd\ instar\ wing} =$   
923  $3.2 \cdot 10^{-8}$ ). (D) Representative temporal autocorrelation curves recorded in second  
924 and third instar wing and leg imaginal discs, expressing *Antp-eGFP*. Note the low  
925 concentration in second instar leg and wing discs, reflected by the relatively high  
926 amplitude of the autocorrelation curves (as it is inversely proportional to the number  
927 of molecules), as compared to the high concentration in third instar discs. (E)  
928 Temporal autocorrelation curves shown in (D) normalized to the same amplitude,  
929  $G_n(\tau) = 1$  at  $\tau = 10\ \mu s$ , show both a shift towards longer characteristic decay times  
930 in the third instar leg and wing discs and an increase in the relative amplitude of the  
931 second component, indicative of the increased fraction of TF implicated in  
932 interactions with the DNA. Autocorrelation curves are color-coded as outlined in  
933 panel (D). (F) Autocorrelation curves of *Antp-eGFP* in wing disc nuclei.  
934 Concentration differences of fluorescent *Antp* protein are obvious between cells  
935 expressing one or two copies of *Antp-eGFP* (homozygous and heterozygous larvae).  
936 A two-component model for free three-dimensional diffusion and triplet formation has  
937 been used for fitting (black lines). (G) Autocorrelation curves shown in (F) normalized  
938 to the same amplitude,  $G_n(\tau) = 1$  at  $\tau = 10\ \mu s$ , show pronounced overlap between  
939 homozygous and heterozygous *Antp-eGFP*-expressing cells, as well as between  
940 endogenously expressed *Antp* and overexpressed *SynthAntp-eGFP*. Autocorrelation  
941 curves are color-coded as outlined in panel (F). (H) Live imaging of a representative  
942 homozygous, *Antp-eGFP*-expressing wing imaginal disc, in which FCS  
943 measurements in (F-G) have been performed. *Antp* is expressed in the primordia of  
944 the prescutum and the proximal mesothoracic structures. (I) Live imaging of a  
945 representative *Antp-eGFP*-expressing homozygous metathoracic leg disc, in which

946 FCS measurements in (D-E) have been performed. *Antp* is expressed in the  
947 proximal regions of the disc and not restricted to anterior or posterior compartments.  
948 (J) Live imaging of the antennal portion of an eye-antennal disc expressing one copy  
949 of a synthetic *Antp*-eGFP construct, as in (Papadopoulos et al., 2011), from the *Dll*-  
950 enhancer (MD23). The same optical settings were used as in (H) and (I). (K) Live  
951 imaging of the region of maximum *Antp* expression in (H). (L) Close-up of (K). Note  
952 the uneven distribution of *Antp* in the nuclei, its exclusion from the nucleoli (read  
953 arrowheads) and the presence of bright spots (sites of pronounced accumulation,  
954 yellow arrowheads). All images represent one optical section. (M) Binding study of  
955 endogenous *Antp*-eGFP in third instar wing and leg discs. The concentration of  
956 DNA-bound fraction of *Antp*-eGFP molecules, measured by FCS in (F) and (G), is  
957 plotted as a function of the total concentration of *Antp*-eGFP molecules. The slope  
958 and the intercept of the linear regression equation,  $y = 0.38x - 5.78$ , were used to  
959 determine the apparent dissociation constant  $K_{d,app}^{Antp-eGFP} = 18nM$  (for the calculation  
960 refer to Supplement 3). (N) Binding study of endogenous *Antp*-eGFP (third instar  
961 wing and leg discs) and overexpressed *SynthAntp-eGFP* (antennal discs by *ptc*-, *Dll*  
962 (MD23)-, *Dll* (MD713)-, and *69B*-Gal4) using FCS measurements. From the linear  
963 regression equation,  $y = 0.46x - 7.29$ , the apparent dissociation constant was  
964 calculated to be  $K_{d,app}^{Antp-eGFP} = 15nM$  (for the calculation refer to Supplement 5) and is  
965 very similar to the value obtained in (M). Note that in both (M) and (N) *Antp* binding  
966 to the DNA increases linearly with increasing concentration of TF, but in the  
967 concentration range of this study ( $0.2 - 6 \mu M$ ), saturation is not reached. (O) Binding  
968 study of endogenous *Antp*-eGFP in second instar wing and leg discs. From the linear  
969 regression equation,  $y = 0.44x - 2.6$ , the apparent dissociation constant was  
970 calculated to be  $K_{d,app}^{Antp-eGFP} = 131nM$  (for the calculation refer to Supplement 6).

971 This value is higher than in third instar, indicating weaker affinity of binding to the  
972 DNA. Scale bars denote 100  $\mu m$ , unless otherwise indicated.

973

974 Figure 6 figure supplement 1: Analysis of characteristic decay times of Antp-  
975 **eGFP as a function of total concentration and study of Antp binding in third**  
976 **instar discs by Fluorescence Recovery After Photobleaching (FRAP).** (A-B)

977 Characteristic decay times  $\tau_{D_1}$  (A) and  $\tau_{D_2}$  (B) do not vary with the concentration of  
978 Antp-eGFP TF molecules, as evident from  $\tau_{D_1} = f(N_1)$  and  $\tau_{D_2} = f(N_2)$ , where  $N_1$   
979 is the number of freely diffusing,  $N_2$  the number of bound Antp-eGFP TF molecules  
980 and  $\tau_{D_1}$ ,  $\tau_{D_2}$  their respective diffusion times. (C) FRAP analysis of endogenous Antp-  
981 eGFP in nuclei of wing disc cells. Absence of recovery even after 360 sec (6 min)  
982 indicates long residence of endogenous Antp-eGFP on the DNA with  $k_{off}^{specific} < 6 \cdot$   
983  $10^{-3} s^{-1}$ .

984

985 Figure 6 – figure supplement 2: Binding study of Antp. (A-C) Close-up of linear  
986 regression curves of Antp binding under different conditions to denote the obtained  
987 slopes and intercepts that were used in the calculation of the apparent equilibrium  
988 dissociation constants.

989

990 Figure 7: Control of relative isoform abundance favors the transition of Antp  
991 **from auto-activation to auto-repression and is independent of the YPWM motif.**

992 (A) Schematic representation of the linker region between the YPWM motif and the  
993 homeodomain. A four amino acid-encoding exon (GKCQ) is spliced 5' to the  
994 homeodomain-encoding exon, generating a long-linker isoform. In the mutated  
995 SynthAntp constructs the YPWM motif has been substituted by alanines. (B-I') The

996 non-conserved N terminus and the YPWM motif are dispensable for Antp auto-  
997 repression, but short linker isoforms display stronger auto-repression capacity.  
998 *SynthAntp-eGFP* transgenes encoding Antp isoforms with a wild type YPWM motif  
999 and a long (B-C') or a short (D-E') linker, as well as isoforms bearing a substitution of  
1000 the YPWM motif by alanines and a long (F-G') or a short (H-I') linker were induced  
1001 from the *ptc* enhancer and Antp protein repression was monitored at the proximal  
1002 portion of the wing disc (white arrows). (J) The efficiency of the repression was  
1003 monitored and normalized to the intensity of Antp staining when an eGFP transgene  
1004 was overexpressed by *ptc*-Gal4. All constructs repress the endogenous Antp protein  
1005 in various degrees and the auto-repression does not require the YPWM motif. Short  
1006 linker Antp isoforms repress more efficiently whether in the context of a wild type or  
1007 mutated YPWM motif. Intensities were calculated using Fiji (Schindelin et al., 2012).  
1008 Statistical significance was determined using a two-tailed Student's T-test (\*\*\*,  
1009  $p < 0.001$ , namely  $p_{YPWM, long-short linker} = 2.4 \cdot 10^{-4}$  and  $p_{AAAA, long-short linker} = 2.3 \cdot$   
1010  $10^{-7}$ ; n.s., non-significant, namely  $p_{YPWM-AAAA, short linker} = 2.7 \cdot 10^{-1}$ ). (K)  
1011 Quantification of the relative concentrations of short and long linker *Antp* transcripts  
1012 in wild type flies at different developmental stages. The relative abundance of the  
1013 long linker variant, as compared to the short linker one, is higher in the embryo, but  
1014 gradually decreases during larval stages. In third instar larvae the short linker  
1015 transcript comprises about 80% of the total *Antp* mRNA. Note that the quantification  
1016 is relative and not absolute. The significance of differences in repression capacity  
1017 and relative abundance of long and short linker transcripts in (I-J) have been  
1018 determined using Student's two-tailed T-test (\*\*\*,  $p < 0.001$ , namely  
1019  $p_{3rd instar wing-2nd instar} = 2.3 \cdot 10^{-5}$ ,  $p_{3rd instar leg-2nd instar} = 8 \cdot 10^{-6}$ , and  
1020  $p_{2nd instar-embryo} = 5.5 \cdot 10^{-5}$ ; n.s., non-significant, namely  $p_{3rd instar leg-wing} = 6.4 \cdot$

1021  $10^{-1}$ ). (L-L') FCS analysis performed on third instar wing and antennal imaginal  
1022 discs, expressing short or long linker Antp isoforms (tagged to eGFP) close to  
1023 endogenous concentrations, from the *69B*-enhancer (also studied in Figure 5 D).  
1024 Cell nuclei of similar concentrations in the two datasets have been selected for  
1025 analysis (L'). Temporal autocorrelation curves from FCS measurements on the short  
1026 linker Antp isoform display a consistent shift towards longer characteristic decay  
1027 times and higher amplitude of the slow component, as compared to its long linker  
1028 counterpart (L). (M-N) Binding study of short and long linker Antp isoforms in third  
1029 instar wing and leg discs, expressed by *69B*-Gal4, as in (L-L'). The concentration of  
1030 the DNA-bound complexes (L-L'), is plotted as a function of the total concentration of  
1031 Antp-eGFP molecules. From the linear regression equation,  $y = 0.34x - 5.31$ , the  
1032 apparent dissociation constant for the short linker isoform was calculated to be  
1033  $K_{d, Antp}^{short linker isof., o/e} = 18nM$  (M) and from the linear regression equation  $y = 0.24x -$   
1034 3.28, the apparent dissociation constant for the long linker isoform was calculated to  
1035 be  $K_{d, Antp}^{long linker isof., o/e} = 190nM$  (N) (for the calculation refer to Supplement 6). The  
1036 two dissociation constants differ by about one order of magnitude, indicating stronger  
1037 binding of the short linker isoform to the DNA, as compared to the long linker one.  
1038 Scale bars denote  $100 \mu m$ .

1039

1040 Figure 7 – figure supplement 1: Binding study of Antp. (A-B) Close-up of linear  
1041 regression curves of Antp binding under different conditions to denote the obtained  
1042 slopes and intercepts that were used in the calculation of the apparent equilibrium  
1043 dissociation constants.

1044

1045 **Figure 7 – figure supplement 2: The Antp YPWM motif is required for Antp auto-**  
1046 **activation, but long linker isoforms display stronger auto-activation potential.**  
1047 (A-D) Overexpression of full-length, long linker *Antp* variant by *ptc*-Gal4 in the  
1048 embryo results in weak ectopic activation of the *Antp* P1 reporter in regions anterior  
1049 and posterior to the *Antp* normal expression domain (A-B), whereas expression of a  
1050 short linker, full-length variant results in little, if any, ectopic transcription of the  
1051 reporter (C-D). (E-G) Mutated full-length *Antp* with conversion of the YPWM motif to  
1052 alanines completely fails to ectopically activate the reporter (O-P) and shows similar  
1053 staining as the control embryo in (G). White brackets indicate the normal expression  
1054 domain of *Antp* in thoracic segments and red dashed lines outline the ectopic  
1055 expression. Scale bars denote 100  $\mu m$ .

1056

1057 **Figure 8: Antp suppresses its variation through a developmental switch from**  
1058 **auto-activation to auto-repression that depends on concentration, relative**  
1059 **abundance of isoforms and their DNA-binding properties.** Schematic  
1060 representation of the regulatory role of *Antp* during the transition from early to late  
1061 larval thoracic disc development. During early stages, the average concentrations of  
1062 *Antp* are relatively low (for simplicity demonstrated here as only a few molecules per  
1063 nucleus), but the variation in concentration among neighboring cells is relatively high  
1064 (expressed by the coefficient of variation or the Fano factor). Nuclei containing  
1065 higher amount of preferentially activating isoforms (featuring a long linker, as shown  
1066 in Figure 7 A) in the majority of the cells (but not necessarily all of them) undergo  
1067 transcriptional auto-activation of the *Antp* gene. The binding of the activating isoform  
1068 to the DNA involves fast diffusion and the affinity to the DNA, evidenced from the  
1069 apparent equilibrium dissociation constant ( $K_d$ ), is relatively low. As development



1070 proceeds, transcriptional auto-activation has increased the average concentration of  
1071 Antp. Subject to an unknown regulatory mechanism (splicing regulation, differential  
1072 lifetime of mRNA or protein, preferential degradation etc.), the equilibrium of  
1073 activating and repressing Antp isoforms (featuring a short linker, as shown in Figure  
1074 7 A) is shifted, favoring the persistence of the repressing isoforms, which display  
1075 higher affinity of DNA binding and slower diffusion on the DNA. This regulatory  
1076 switch accounts for a progressive deceleration/cessation of the production of more  
1077 Antp protein and suppresses cell-to-cell variability.

1078

1079 Figure 8 – figure supplement 1: Maintenance of Antp expression is required for  
1080 **normal leg and notum development.** (A) Gain- and loss-of-function phenotypes  
1081 generated by overexpression of *SynthAntp-eGFP* (upper row) and *mCitrine-SynthScr*  
1082 (lower row) by the *Dll-Gal4* (MD23) driver. While flies expressing *SynthAntp* are fully  
1083 viable and all display ectopic tarsi in the antenna, flies expressing *SynthScr* also  
1084 display tarsal transformations in the antenna, but have complete absence of tarsal  
1085 segments in the legs and die as pharate adults. Black arrowheads indicate the  
1086 antennal tarsi and red arrows the malformed legs. (B-C) Repression of endogenous  
1087 Antp by induction of *SynthScr* from the *ptc* enhancer. (D-E) Repression of  
1088 endogenous *Antp* by *SynthScr* takes place at the transcriptional level, as visualized  
1089 by the *Antp* P1 reporter. The arrows in (B) and (D) indicate the region of Antp  
1090 repression, where the *ptc* and *Antp* expression domains overlap. (F-G) Contrary to  
1091 *SynthAntp*, *SynthScr* fails to ectopically activate the *Antp* P1 reporter in the wing  
1092 disc, despite overexpression by the “strong” *Dll-Gal4* driver (MD23). (H-I) Contrary to  
1093 Antp, *SynthScr* fails to repress itself in the prothoracic leg disc, when overexpressed  
1094 by *Dll-Gal4* (MD23). Dashed line marks the region of major overlap between



1095 endogenous and *SynthScr* proteins. (J-K') Repression of endogenous *Antp* in the  
1096 notum, caused by ectopic expression of *SynthScr* from the *MS243-Gal4* driver.  
1097 White brackets in (J) and (J') show the region of *Antp* repression in the notum. (L-M)  
1098 Ectopic expression of *SynthAntp* by *MS243-Gal4* causes mild defects in the  
1099 scutelum (indicated by black arrows), whereas the remaining notum structures are  
1100 wild type-like (L). The observed eye-reduction is caused by a *Dr* allele. In contrast,  
1101 ectopic expression of *SynthScr* causes severe malformations of the notum and head,  
1102 including complete loss of eyes (M). (N-Q) Control discs, showing that ectopic  
1103 expression of *SynthAntp* by *MS243-Gal4* causes repression of endogenous *Antp* in  
1104 the notum (white arrows) (N-O'), but no repression is observed by ectopic expression  
1105 of *eGFP* alone (P-Q). Scale bars denote 100  $\mu\text{m}$ , unless otherwise indicated.

1106

## 1107 **Acknowledgements**

1108

1109 We are deeply saddened by the unexpected passing of Prof. Walter J.  
1110 Gehring, at the very inception of this work, when the project was still in the planning  
1111 and preliminary data gathering stage. Prof. Gehring was an extraordinary human  
1112 being and a scientific giant, whose work will continue to educate and inspire  
1113 generations to come. The authors are indebted to Sonal Nagarkar Jaiswal, Paolo  
1114 Mangahas, and Hugo J. Bellen for creating and sharing with us the *Antp-eGFP* line.  
1115 DKP has been supported by a long-term fellowship from the Swiss National Science  
1116 Foundation (PBBSP-138700) and a long-term fellowship from the Federation of  
1117 European Biochemical Societies (FEBS) at initial stages of this project. VV has been  
1118 supported by the Knut and Alice Wallenberg foundation and Karolinska Institute  
1119 Research Funds. DKP would like to express his gratitude to PT for outstanding

1120 scientific, and uninterrupted financial, support. DKP is indebted to Markus Burkhardt,  
1121 head of the imaging platform at the Center for Regenerative Therapies Dresden  
1122 (CRTD), for help and discussions regarding FCS experiments in Dresden; Sylke  
1123 Winkler and the DNA sequencing facility of the Max-Planck Institute of Molecular Cell  
1124 Biology and Genetics (MPI-CBG) for providing assistance with Antp transcript variant  
1125 quantification; as well as the Light Microscopy facility of MPI-CBG. DKP is also  
1126 grateful to KS for numerous discussions and support throughout the implementation  
1127 of this work.

1128

## 1129 **Materials and Methods**

1130

### 1131 Fly stocks used

1132 The Antp-eGFP MiMIC line has been a kind gift from Hugo J. Bellen. The  
1133 *atonal* (VDRC ID 318959), *brinker* (VDRC ID 318246), *spalt major* (VDRC ID  
1134 318068), *yorkie* (VDRC ID 318237), *senseless* (VDRC ID 318017) and *Sex combs*  
1135 *reduced* (VDRC ID 318441) fosmid lines are available from the Vienna Drosophila  
1136 Resource Center (VDRC) and have been generated recently in our laboratory (Sarov  
1137 et al., 2016). The *fork head* (stock 43951), *grainy head* (stock 42272), *Abdominal B*  
1138 (stock 38625), *eyeless*, (stock 42271), *spineless* (transcript variant A, stock 42289),  
1139 and *grain* (stock 58483) tagged BACs were generated by Rebecca Spokony and  
1140 Kevin P. White and are available at the Bloomington Stock Center. For the *scalloped*  
1141 gene, a GFP-trap line was used (Buszczak et al., 2007), a kind gift from Allan C.  
1142 Spradling laboratory (line CA07575), with which genome-wide chromatin  
1143 immunoprecipitation experiments have been performed (Slattery et al., 2013). For  
1144 the *spineless* gene, Bloomington stock 42676, which tags isoforms C and D of the

1145 Spineless protein has been also tried in fluorescence imaging and FCS experiments,  
1146 but did not yield detectable fluorescence in the antennal disc, rendering it  
1147 inappropriate to be used in our analysis. Therefore, we resided to stock 42289,  
1148 which tags the A isoform of the protein. For the *eyeless* gene, the  
1149 FlyFos015860(pRedFlp-Hgr)(ey13630::2XTY1-SGFP-V5-preTEV-BLRP-  
1150 3XFLAG)dFRT line (VDRC ID 318018) has been tried also in fluorescence imaging  
1151 and FCS experiments, but did not yield detectable fluorescence in the eye disc for it  
1152 to be used in our analysis. The *act5C-FRT-yellow-FRT-Gal4* line used for clonal  
1153 overexpression or knock down has been described (Ito et al., 1997). The UAS-*Antp*  
1154 lines (synthetic and full-length, wild type or modified), as well as UAS-*Scr* constructs  
1155 have been previously described (Papadopoulos et al., 2011; Papadopoulos et al.,  
1156 2010). The *Dll-Gal4* (MD23 and MD713) lines have been a kind gift of Ginés Morata  
1157 (Calleja et al., 1996). *69B-Gal4* and *ptc-Gal4* have been obtained from the  
1158 Bloomington Stock Center. The *Antp P1-lacZ* has been previously described  
1159 (Engstrom et al., 1992; Zink et al., 1991) and spans the region between 9.4 kb  
1160 upstream of the P1 promoter transcription initiation site and 7.8 kb downstream into  
1161 the first intron, including the first exon sequences and thus comprising 17.2 kb of  
1162 *Antp* regulatory sequences (pAPT 1.8). The line used has been an insertion of the  
1163 pAPT 1.8 vector bearing the P1 promoter regulatory sequences upstream of an  
1164 *actin-lacZ* cytoplasmic reporter and has been inserted in cytogenetic location 99F on  
1165 the right chromosomal arm of chromosome 3. The *Dll-* and *Antp-RNAi* lines have  
1166 been from VDRC, lines GD4607 and KK101774, respectively. UAS-eGFP stock was  
1167 a kind gift of Konrad Basler. We are indebted to Sebastian Dunst for generating the  
1168 *ubi-FRT-mCherry(stop)-FRT-Gal4(VK37)/CyO* line, which drives clonal  
1169 overexpression upon flippase excision, while simultaneously marking cells by the

1170 loss of mCherry. For red-color labeling of clones the *act5C-FRT-CD2-FRT-Gal4*,  
1171 UAS-mRFP1(NLS)/TM3 stock 30588 from the Bloomington Stock Center has been  
1172 used. The *MS243-Gal4; UAS-GFP/CyO* line was a kind gift from the laboratory of  
1173 Ernesto Sánchez-Herrero.

1174

1175 Fly genotypes of fluorescence images

1176 Figure 1 A: FlyFos018487(pRedFlp-Hgr)(ato37785::2XTY1-SGFP-V5-preTEV-  
1177 BLRP-3XFLAG)dFRT

1178 Figure 1 B: FlyFos024884(pRedFlp-Hgr)(brk25146::2XTY1-SGFP-V5-preTEV-  
1179 BLRP-3XFLAG)dFRT

1180 Figure 1 C: FlyFos030836(pRedFlp-Hgr)(salm30926::2XTY1-SGFP-V5-preTEV-  
1181 BLRP-3XFLAG)dFRT

1182 Figure 1 D: FlyFos029681(pRedFlp-Hgr)(yki19975::2XTY1-SGFP-V5-preTEV-BLRP-  
1183 3XFLAG)dFRT

1184 Figure 1 E:  $w^{1118}$ ; PBac(fkh-GFP.FPTB)VK00037/SM5

1185 Figure 1 F: *sd*-eGFP (FlyTrap, homozygous)

1186 Figure 1 G:  $w^{1118}$ ; PBac(grh-GFP.FPTB)VK00033

1187 Figure 1 H: FlyFos018974(pRedFlp-Hgr)(Scr19370::2XTY1-SGFP-V5-preTEV-  
1188 BLRP-3XFLAG)dFRT

1189 Figure 1 I: FlyFos015942(pRedFlp-Hgr)(sens31022::2XTY1-SGFP-V5-preTEV-  
1190 BLRP-3XFLAG)dFRT

1191 Figure 1 J and K: Antp-eGFP (MiMIC) homozygous (line MI02272, converted to an  
1192 artificial exon)

1193 Figure 1 L:  $w^{1118}$ ; PBac(Abd-B-EGFP.S)VK00037/SM5

1194 Figure 1 M:  $w^{1118}$ ; PBac(ey-GFP.FPTB)VK00033

1195 Figure 1 N: *w*<sup>1118</sup>; PBac(ss-GFP.A.FPTB)VK00037  
1196 Fi.g 1 O and P: *w*<sup>1118</sup>; PBac(grn-GFP.FPTB)VK00037  
1197 Figure 3 A-C': *hs-flp*; *act5C-FRT-yellow-FRT-Gal4/+*; UAS-SynthAntp-eGFP/+  
1198 Figure 3 D-F: *hs-flp*; *act5C-FRT-yellow-FRT-Gal4/+*; UAS-SynthAntp-eGFP/*Antp* P1-  
1199 *lacZ*  
1200 Figure 3 G-I': *hs-flp/+*; *act5C-FRT-yellow-FRT-Gal4*, UAS-eGFP/+; UAS-*Antp* (full-  
1201 length, untagged)/*Antp* P1-*lacZ*  
1202 Figure 3 J-M and O-R: *Dll-Gal4* (MD23)/+; UAS-SynthAntp-eGFP/*Antp* P1-*lacZ*  
1203 Fig 3 N, S and T-V: *Dll-Gal4* (MD23)/+; UAS-eGFP/*Antp* P1-*lacZ*  
1204 Figure 4 B-J: *hs-flp/+*; *ubi-FRT-mChery-FRT-Gal4/+*; *Antp-eGFP* (MiMIC)/UAS-*Antp*  
1205 (full-length, untagged)  
1206 Figure 4 K-L': *hs-flp/+*; UAS-*Antp-RNAi/+*; *Antp-eGFP* (MiMIC)/*act5C-FRT-CD2-*  
1207 *FRT-Gal4*, UASmRFP1(NLS)  
1208 Figure 4 M-P: *hs-flp/+*; UAS-*Antp-RNAi/+*; *Antp* P1-*lacZ/act5C-FRT-CD2-FRT-Gal4*,  
1209 UASmRFP1(NLS)  
1210 Figure 4 Q-R': *hs-flp/+*; *act5C-FRT-yellow-FRT-Gal4/+*; *Antp* P1-*lacZ/UAS-eGFP*  
1211 Figure 5 A and E: *Dll-Gal4* (MD23)/+; UAS-SynthAntp-eGFP/+  
1212 Fig 5 B and F: *ptc-Gal4/+*; UAS-SynthAntp-eGFP/+  
1213 Figure 5 C and G: *Dll-Gal4* (MD713)/+; UAS-SynthAntp-eGFP/+  
1214 Figure 5 D, H and K, L, O: *69B-Gal4/UAS-SynthAntp-eGFP*  
1215 Figure 5 M, N and P: *69B-Gal4/UAS- eGFP*  
1216 Figure 6 A, B, H, I, K and L: *Antp-eGFP* (MiMIC) homozygous  
1217 Figure 6 J: *Dll-Gal4* (MD23)/+; UAS-SynthAntp-eGFP/+  
1218 Figure 7 B-C': *ptc-Gal4/+*; UAS-Synth<sup>YPWM,LL</sup>*Antp-eGFP/+*  
1219 Figure 7 D-E': *ptc-Gal4/+*; UAS-Synth<sup>YPWM,SL</sup>*Antp-eGFP/+*

- 1220 Figure 7 F-G': *ptc-Gal4/+*; UAS-Synth<sup>AAAA,LL</sup>Antp-eGFP/+
- 1221 Figure 7 H-I': *ptc-Gal4/+*; UAS-Synth<sup>AAAA,SL</sup>Antp-eGFP/+
- 1222 Figure S2: Antp-eGFP (MiMIC)/TM3, *dfd*-YFP
- 1223 Figure S3 upper panel: *Dll-Gal4* (MD23)/+; UAS-SynthAntp-eGFP/+ or *ptc-Gal4/+*;
- 1224 UAS-SynthAntp-eGFP/+ and *Dll-Gal4* (MD23)/+; UAS- eGFP/+ or *ptc-Gal4/+*; UAS-
- 1225 eGFP/+ in control stainings
- 1226 Figure S3 lower panel: *Dll-Gal4* (MD23)/+; UAS-SynthAntp-eGFP/*Antp* P1-*lacZ* and
- 1227 *Dll-Gal4* (MD23)/+; UAS- eGFP/*Antp* P1-*lacZ* in control stainings
- 1228 Figure S4 A-C'': *hs-flp/+*; *act5C-FRT-yellow-FRT-Gal4/+*; UAS-SynthAntp-
- 1229 eGFP/UAS-*Dll*-RNAi
- 1230 Figure S4 D and E: *hs-flp/+*; *act5C-FRT-yellow-FRT-Gal4/+*; UAS-eGFP/UAS-*Dll*-
- 1231 RNAi
- 1232 Figure S5: *hs-flp*; *act5C-FRT-yellow-FRT-Gal4/+*; UAS-SynthAntp-eGFP/*Antp* P1-
- 1233 *lacZ*
- 1234 Figure S6 A-D: *Dll-Gal4* (MD713)/+; UAS-SynthAntp-eGFP/*Antp* P1-*lacZ*
- 1235 Figure S6 E-F': *69B-Gal4*/UAS-SynthAntp-eGFP
- 1236 Figure S6 G-H': *ptc-Gal4/+*; UAS-SynthAntp-eGFP/+
- 1237 Figure S6 I-J': *ptc-Gal4/+*; UAS-eGFP/+
- 1238 Fig S9 A and B: *ptc-Gal4/+*; *Antp* P1-*lacZ*/UAS-<sup>YPWM,LL</sup>Antp (full-length, untagged)
- 1239 Figure S9 C and D: *ptc-Gal4/+*; *Antp* P1-*lacZ*/UAS-<sup>YPWM,SL</sup>Antp (full-length,
- 1240 untagged)
- 1241 Figure S9 E and F: *ptc-Gal4/+*; *Antp* P1-*lacZ*/UAS-<sup>AAAA,LL</sup>Antp (full-length, untagged)
- 1242 Figure S9 G: *Antp* P1-*lacZ*/TM3, *dfd*-YFP
- 1243 Figure S10 A upper row: *Dll-Gal4* (MD23)/+; UAS-SynthAntp-eGFP/+
- 1244 Figure S10 A lower row, B-C', H and I: *Dll-Gal4* (MD23)/+; UAS-mCitrine-SynthScr/+

1245 Figure S10 D-E: *ptc-Gal4/+; UAS-mCitrine-SynthScr/Antp P1-lacZ*

1246 Figure S10 F and G: *Dll-Gal4 (MD23)/+; UAS-mCitrine-SynthScr/Antp P1-lacZ*

1247 Figure S10 J-K' and M: *MS243-Gal4/+; UAS-mCitrine-SynthScr/Dr*

1248 Figure S10 L and N-O': *MS243-Gal4/+; UAS-SynthAntp-eGFP/Dr*

1249 Figure S10 P and Q: *MS243-Gal4; UAS-eGFP*

1250

1251 Preparation of second and third instar imaginal discs for FCS measurements.

1252 For FCS measurements, imaginal discs (eye-antennal, wing, leg, humeral and  
1253 genital) and salivary glands were dissected from third instar wandering larvae, or  
1254 wing and leg discs from second instar larvae, in Grace's insect tissue culture  
1255 medium (ThermoFisher Scientific, 11595030) and transferred to 8-well chambered  
1256 coverglass (Nunc® Lab-Tek™, 155411) containing PBS just prior to imaging or FCS  
1257 measurements. Floating imaginal discs or salivary glands were sunk to the bottom of  
1258 the well using forceps.

1259

1260 Immunostainings in embryos and larval imaginal discs

1261 Embryonic stainings were performed using the precise protocol from (Grieder  
1262 et al., 2000). Larval imaginal discs were stained according to (Papadopoulos et al.,  
1263 2010). Stainings for the endogenous Antp protein have been performed using a  
1264 mouse anti-Antp antibody (Developmental Studies Hybridoma Bank, University of  
1265 Iowa, anti-Antp 4C3) in a dilution of 1:250 for embryos and 1:500 for imaginal discs.  
1266 eGFP, or eGFP-tagged proteins have been stained using mouse or rabbit anti-GFP  
1267 antibodies from ThermoFisher Scientific in a dilution of 1:500 in imaginal discs and  
1268 1:250 in embryos. mRFP1 was stained using a Chromotek rat anti-RFP antibody. A  
1269 rabbit anti- $\beta$ -galactosidase antibody (Cappel) has been used for *Antp P1* promoter

1270 stainings in a dilution of 1:1000 in the embryo, whereas for stainings in imaginal  
1271 discs we used the mouse anti- $\beta$ -galactosidase 40-1a antibody from Developmental  
1272 Studies Hybridoma Bank, University of Iowa in a dilution of 1:50. Confocal images of  
1273 antibody stainings represent predominately Z-projections and Zeiss LSM510, Zeiss  
1274 LSM700 or Zeiss LSM880 Airyscan confocal laser scanning microscopy systems  
1275 with an inverted stand Axio Observer microscope were used for imaging. Image  
1276 processing has been performed in Fiji (Schindelin et al., 2012). For optimal spectral  
1277 separation, secondary antibodies coupled to Alexa405, Alexa488, Alexa594 and Cy5  
1278 (ThermoFischer Scientific) were used.

1279

#### 1280 Colocalization of wild type and eGFP-tagged MiMIC Antp alleles in imaginal discs

1281 To examine whether the pattern of the MiMIC Antp-eGFP fusion protein  
1282 recapitulates the Antp wild type expression pattern in both embryo and larval  
1283 imaginal discs, we performed immunostainings of heterozygous Antp-eGFP and wild  
1284 type flies to visualize the embryonic (stage 13) and larval expression of *Antp* and  
1285 eGFP. In this experiment, we 1) visualized the overlap between eGFP and *Antp* (the  
1286 eGFP pattern reflects the protein encoded by the MiMIC allele, whereas the *Antp*  
1287 pattern reflects the sum of protein produced by the MiMIC allele and the allele of the  
1288 balancer chromosome) and 2) compared the eGFP expression pattern to the Antp  
1289 expression pattern in wild type discs and embryos.

1290

#### 1291 Induction of early and late overexpression and RNAi-knockdown clones in imaginal 1292 discs

1293 Genetic crosses with approximately 100 virgin female and 100 male flies were  
1294 set up in bottles and the flies were allowed to mate for 2 days. Then, they were



1295 transferred to new bottles and embryos were collected for 6 hours at 25°C. Flies  
1296 were then transferred to fresh bottles and kept until the next collection at 18°C. To  
1297 assess Antp auto-activation, the collected eggs were allowed to grow at 25°C for 26 h  
1298 from the midpoint of collection, when they were subjected to heat-shock by  
1299 submersion to a water-bath of 38°C for 30 min and then placed back at 25°C until  
1300 they reached the stage of third instar wandering larvae, when they were collected for  
1301 dissection, fixation and staining with antibodies. To assess Antp auto-repression, the  
1302 same procedure was followed, except that the heat-shock was performed at 60 h of  
1303 development after the midpoint of embryo collection. Whenever necessary, larval  
1304 genotypes were selected under a dissection stereomicroscope with green and red  
1305 fluorescence filters on the basis of *deformed* (*dfd*)-YFP bearing balancer  
1306 chromosomes (Le et al., 2006) and visual inspection of fluorescence in imaginal  
1307 discs.

1308

#### 1309 Measurement of Antp transcript variant abundance

1310 The linker between the Antp YPWM motif and the homeodomain encodes the  
1311 sequence RSQFGKCQE. Short linker isoforms encode the sequence RSQFE,  
1312 whereas long linker isoforms are generated by alternative splicing of a 12 base pair  
1313 sequence encoding the four amino acid sequence GKCQ into the mRNA. We initially  
1314 designed primer pairs for RT-qPCR experiments to distinguish between the short  
1315 and long linker mRNA variants. For the short linker variant, we used nucleotide  
1316 sequences corresponding to RSQFERKR (with RKR being the first 3 amino acids of  
1317 the homeodomain). For detection of the long linker variant we designed primers  
1318 either corresponding to the RSQFGKCQ sequence, or GKCQERKR. We observed in  
1319 control PCRs (using plasmid DNA harboring either a long or a short linker cDNA)

1320 that primers designed for the short linker variant still amplified the long linker one.  
1321 Moreover, with linker sequences differing in only four amino acids, encoded by 12  
1322 base pairs, primer pairs flanking the linker could also not be used, since both variants  
1323 would be amplified in RT-qPCR experiments with almost equal efficiencies.  
1324 Therefore, we used primer pairs flanking the linker region to indiscriminately amplify  
1325 short and long linker variants, using non-saturating PCR (18 cycles) on total cDNA  
1326 generated from total RNA. We then resolved and assessed the relative amounts of  
1327 long and short linker amplicons in a second step using Fragment Analyzer  
1328 (Advanced Analytical). RNA was extracted from stage 13 embryos, second instar  
1329 larvae at 60 h of development, and leg or wing discs from third instar wandering  
1330 larvae using the Trizol<sup>®</sup> reagent (ThermoFischer Scientific), following the  
1331 manufacturer's instructions. Total RNA amounts were measured by NanoDrop and  
1332 equal amounts were used to synthesize cDNA using High-Capacity RNA-to-cDNA<sup>™</sup>  
1333 Kit (ThermoFischer Scientific), following the manufacturer's instructions. Total cDNA  
1334 yields were measured by NanoDrop and equal amounts were used in PCR, using in-  
1335 house produced Taq polymerase. 10 ng of plasmid DNA, bearing either a long or a  
1336 short transcript cDNA were used as a control. PCR product abundance was  
1337 analyzed both by agarose gel electrophoresis and using Fragment Analyzer  
1338 (Advanced Analytical).

1339

#### 1340 Fluorescence Microscopy Imaging of live cells and FCS

1341 Fluorescence imaging and FCS measurements were performed on two  
1342 uniquely modified confocal laser scanning microscopy systems, both comprised of  
1343 the ConfoCor3 system (Carl Zeiss, Jena, Germany) and consisting of either an  
1344 inverted microscope for transmitted light and epifluorescence (Axiovert 200 M); a

1345 VIS-laser module comprising the Ar/ArKr (458, 477, 488 and 514 nm), HeNe 543 nm  
1346 and HeNe 633 nm lasers and the scanning module LSM510 META; or a Zeiss  
1347 LSM780 inverted setup, comprising Diode 405 nm, Ar multiline 458, 488 and 514  
1348 nm, DPSS 561 nm and HeNe 633 nm lasers. Both instruments were modified to  
1349 enable detection using silicon Avalanche Photo Detectors (SPCM-AQR-1X;  
1350 PerkinElmer, USA) for imaging and FCS. Images were recorded at a 512X512 pixel  
1351 resolution. C-Apochromat 40x/1.2 W UV-VIS-IR objectives were used throughout.  
1352 Fluorescence intensity fluctuations were recorded in arrays of 10 consecutive  
1353 measurements, each measurement lasting 10 s. Averaged curves were analyzed  
1354 using the software for online data analysis or exported and fitted offline using the  
1355 OriginPro 8 data analysis software (OriginLab Corporation, Northampton, MA). In  
1356 either case, the nonlinear least square fitting of the autocorrelation curve was  
1357 performed using the Levenberg–Marquardt algorithm. Quality of the fitting was  
1358 evaluated by visual inspection and by residuals analysis. Control FCS  
1359 measurements to assess the detection volume were routinely performed prior to data  
1360 acquisition, using dilute solutions of known concentration of Rhodamine 6G and  
1361 Alexa488 dyes. The variation between independent measurements reflects  
1362 variations between cells, rather than imprecision of FCS measurements. For more  
1363 details on Fluorescence Microscopy Imaging and FCS, refer to Supplement 1.

1364

#### 1365 Sample size, biological and technical replicates

1366 For the measurement of TF molecular numbers and variation (Figures 1 and  
1367 2), 7-10 larvae of each fly strain were dissected, yielding at least 15 imaginal discs,  
1368 which were used in FCS analysis. For the Fkh TF, 7 pairs of salivary glands were  
1369 analyzed and for AbdB, 12 genital discs were dissected from 12 larvae. More than

1370 50 FCS measurements were performed in patches of neighboring cells of these  
1371 dissected discs, in the regions of expression indicated in Figure 1 by arrows.  
1372 Imaginal discs from the same fly strain (expressing a given endogenously-tagged  
1373 TF) were analyzed on at least 3 independent instances (FCS sessions), taking place  
1374 on different days (biological replicates) and for Antp, which was further analyzed in  
1375 this study, more than 20 independent FCS sessions were used. As routinely done  
1376 with FCS measurements in live cells, these measurements were evaluated during  
1377 acquisition and subsequent analysis and, based on their quality (high counts per  
1378 molecule and second, low photobleaching), were included in the calculation of  
1379 concentration and variability. In Figure 2 A,  $n$  denotes the number of FCS  
1380 measurements included in the calculations.

1381 For experiments involving immunostainings in imaginal discs to understand  
1382 the auto-regulatory behavior of Antp (Figures 3 and 5-7 and their figure supplements,  
1383 except for the temporally-resolved auto-activating and repressing study of Antp in  
1384 Figure 4, as discussed above), 14-20 male and female flies were mated in bottles  
1385 and 10 larvae were selected by means of fluorescent balancers and processed  
1386 downstream. Up to 20 imaginal discs were visualized by fluorescence microscopy  
1387 and high resolution Z-stacks were acquired for 3-5 representative discs or disc  
1388 regions of interest per experiment. All experiments were performed in triplicate,  
1389 except for the temporal analysis of Antp auto-regulatory behavior in Figure 4, which  
1390 was performed 5 times and the quantification of repression efficiency of short and  
1391 long linker Antp isoforms in Figure 7, which was performed 4 times.

1392 For the quantification of transcript variant abundance in Figure 7 K, RNA and  
1393 thus cDNA was prepared from each stage 3 independent times (biological replicates)  
1394 and the transcript abundance per RNA/cDNA sample was also analyzed 3 times.

1395 For the experiment on the requirement of Antp maintenance for proper leg  
1396 development in Figure 8 – figure supplement 1, A, more than 100 adult flies have  
1397 been analyzed and this experiment has been performed more than 10 times  
1398 independently.

1399

## 1400 **References**

1401 Affolter, M., Percival-Smith, A., Muller, M., Leupin, W., and Gehring, W.J. (1990).  
1402 DNA binding properties of the purified Antennapedia homeodomain. Proc Natl Acad  
1403 Sci U S A 87, 4093-4097.

1404 Appel, B., and Sakonju, S. (1993). Cell-Type-Specific Mechanisms of Transcriptional  
1405 Repression by the Homeotic Gene-Products Ubx and Abd-a in Drosophila Embryos.  
1406 Embo Journal 12, 1099-1109.

1407 Baker, N.E., Yu, S., and Han, D. (1996). Evolution of proneural atonal expression  
1408 during distinct regulatory phases in the developing Drosophila eye. Current biology :  
1409 CB 6, 1290-1301.

1410 Becskei, A., and Serrano, L. (2000). Engineering stability in gene networks by  
1411 autoregulation. Nature 405, 590-593.

1412 Blake, W.J., M, K.A., Cantor, C.R., and Collins, J.J. (2003). Noise in eukaryotic gene  
1413 expression. Nature 422, 633-637.

1414 Boettiger, A.N., and Levine, M. (2013). Rapid transcription fosters coordinate snail  
1415 expression in the Drosophila embryo. Cell reports 3, 8-15.

1416 Brun, V., Dupuis, A., Adrait, A., Marcellin, M., Thomas, D., Court, M., Vandenesch,  
1417 F., and Garin, J. (2007). Isotope-labeled protein standards: toward absolute  
1418 quantitative proteomics. Mol Cell Proteomics 6, 2139-2149.

1419 Buszczak, M., Paterno, S., Lighthouse, D., Bachman, J., Planck, J., Owen, S.,  
1420 Skora, A.D., Nystul, T.G., Ohlstein, B., Allen, A., *et al.* (2007). The carnegie protein  
1421 trap library: a versatile tool for *Drosophila* developmental studies. *Genetics* 175,  
1422 1505-1531.

1423 Calleja, M., Moreno, E., Pelaz, S., and Morata, G. (1996). Visualization of gene  
1424 expression in living adult *Drosophila*. *Science* 274, 252-255.

1425 Clark, N.M., Hinde, E., Winter, C.M., Fisher, A.P., Crosti, G., Blilou, I., Gratton, E.,  
1426 Benfey, P.N., and Sozzani, R. (2016). Tracking transcription factor mobility and  
1427 interaction in *Arabidopsis* roots with fluorescence correlation spectroscopy. *eLife* 5.

1428 Crickmore, M.A., Ranade, V., and Mann, R.S. (2009). Regulation of Ubx expression  
1429 by epigenetic enhancer silencing in response to Ubx levels and genetic variation.  
1430 *PLoS genetics* 5, e1000633.

1431 Dadiani, M., van Dijk, D., Segal, B., Field, Y., Ben-Artzi, G., Raveh-Sadka, T., Levo,  
1432 M., Kaplow, I., Weinberger, A., and Segal, E. (2013). Two DNA-encoded strategies  
1433 for increasing expression with opposing effects on promoter dynamics and  
1434 transcriptional noise. *Genome research* 23, 966-976.

1435 Dublanche, Y., Michalodimitrakis, K., Kummerer, N., Foglierini, M., and Serrano, L.  
1436 (2006). Noise in transcription negative feedback loops: simulation and experimental  
1437 analysis. *Mol Syst Biol* 2, 41.

1438 Ejsmont, R.K., Bogdanzaliewa, M., Lipinski, K.A., and Tomancak, P. (2011).  
1439 Production of fosmid genomic libraries optimized for liquid culture recombineering  
1440 and cross-species transgenesis. *Methods in molecular biology* 772, 423-443.

1441 Ejsmont, R.K., Sarov, M., Winkler, S., Lipinski, K.A., and Tomancak, P. (2009). A  
1442 toolkit for high-throughput, cross-species gene engineering in *Drosophila*. *Nat*  
1443 *Methods* 6, 435-437.

- 1444 Elowitz, M.B., Levine, A.J., Siggia, E.D., and Swain, P.S. (2002). Stochastic gene  
1445 expression in a single cell. *Science* 297, 1183-1186.
- 1446 Emerald, B.S., and Cohen, S.M. (2004). Spatial and temporal regulation of the  
1447 homeotic selector gene *Antennapedia* is required for the establishment of leg identity  
1448 in *Drosophila*. *Dev Biol* 267, 462-472.
- 1449 Engstrom, Y., Schneuwly, S., and Gehring, W.J. (1992). Spatial and Temporal  
1450 Expression of an *Antennapedia* Lac Z Gene Construct Integrated into the  
1451 Endogenous *Antennapedia* Gene of *Drosophila-Melanogaster*. *Dev Genes Evol* 201,  
1452 65-80.
- 1453 Franz, K., Singh, A., and Weinberger, L.S. (2011). Lentiviral vectors to study  
1454 stochastic noise in gene expression. *Methods in enzymology* 497, 603-622.
- 1455 Garaulet, D.L., Foronda, D., Calleja, M., and Sanchez-Herrero, E. (2008). Polycomb-  
1456 dependent *Ultrabithorax* Hox gene silencing induced by high *Ultrabithorax* levels in  
1457 *Drosophila*. *Development* 135, 3219-3228.
- 1458 Gregor, T., Tank, D.W., Wieschaus, E.F., and Bialek, W. (2007a). Probing the limits  
1459 to positional information. *Cell* 130, 153-164.
- 1460 Gregor, T., Wieschaus, E.F., McGregor, A.P., Bialek, W., and Tank, D.W. (2007b).  
1461 Stability and nuclear dynamics of the bicoid morphogen gradient. *Cell* 130, 141-152.
- 1462 Grieder, N.C., de Cuevas, M., and Spradling, A.C. (2000). The fusome organizes the  
1463 microtubule network during oocyte differentiation in *Drosophila*. *Development* 127,  
1464 4253-4264.
- 1465 Gronlund, A., Lotstedt, P., and Elf, J. (2013). Transcription factor binding kinetics  
1466 constrain noise suppression via negative feedback. *Nat Commun* 4, 1864.

- 1467 Hanke, S., Besir, H., Oesterhelt, D., and Mann, M. (2008). Absolute SILAC for  
1468 accurate quantitation of proteins in complex mixtures down to the attomole level. *J*  
1469 *Proteome Res* 7, 1118-1130.
- 1470 Holloway, D.M., Lopes, F.J., da Fontoura Costa, L., Travencolo, B.A., Golyandina,  
1471 N., Usevich, K., and Spirov, A.V. (2011). Gene expression noise in spatial patterning:  
1472 hunchback promoter structure affects noise amplitude and distribution in *Drosophila*  
1473 segmentation. *PLoS computational biology* 7, e1001069.
- 1474 Holloway, D.M., and Spirov, A.V. (2015). Mid-embryo patterning and precision in  
1475 *Drosophila* segmentation: Kruppel dual regulation of hunchback. *PLoS One* 10,  
1476 e0118450.
- 1477 Huang, W., Massouras, A., Inoue, Y., Peiffer, J., Ramia, M., Tarone, A., Turlapati, L.,  
1478 Zichner, T., Zhu, D., Lyman, R., *et al.* (2014). Natural variation in genome  
1479 architecture among 205 *Drosophila melanogaster* Genetic Reference Panel lines.  
1480 *Genome research*.
- 1481 Ito, K., Awano, W., Suzuki, K., Hiromi, Y., and Yamamoto, D. (1997). The *Drosophila*  
1482 mushroom body is a quadruple structure of clonal units each of which contains a  
1483 virtually identical set of neurones and glial cells. *Development* 124, 761-771.
- 1484 Jarman, A.P., Sun, Y., Jan, L.Y., and Jan, Y.N. (1995). Role of the proneural gene,  
1485 *atonal*, in formation of *Drosophila* chordotonal organs and photoreceptors.  
1486 *Development* 121, 2019-2030.
- 1487 Kang, M., Piliszek, A., Artus, J., and Hadjantonakis, A.K. (2013). FGF4 is required  
1488 for lineage restriction and salt-and-pepper distribution of primitive endoderm factors  
1489 but not their initial expression in the mouse. *Development* 140, 267-279.
- 1490 Kaur, G., Costa, M.W., Nefzger, C.M., Silva, J., Fierro-Gonzalez, J.C., Polo, J.M.,  
1491 Bell, T.D., and Plachta, N. (2013). Probing transcription factor diffusion dynamics in



1492 the living mammalian embryo with photoactivatable fluorescence correlation  
1493 spectroscopy. *Nat Commun* 4, 1637.

1494 Kelso, R.J., Buszczak, M., Quinones, A.T., Castiblanco, C., Mazzalupo, S., and  
1495 Cooley, L. (2004). Flytrap, a database documenting a GFP protein-trap insertion  
1496 screen in *Drosophila melanogaster*. *Nucleic Acids Res* 32, D418-420.

1497 Kim, H.D., Shay, T., O'Shea, E.K., and Regev, A. (2009). Transcriptional regulatory  
1498 circuits: predicting numbers from alphabets. *Science* 325, 429-432.

1499 Krasnow, M.A., Saffman, E.E., Kornfeld, K., and Hogness, D.S. (1989).  
1500 Transcriptional activation and repression by Ultrabithorax proteins in cultured  
1501 *Drosophila* cells. *Cell* 57, 1031-1043.

1502 Krieger, J.W., Singh, A.P., Bag, N., Garbe, C.S., Saunders, T.E., Langowski, J., and  
1503 Wohland, T. (2015). Imaging fluorescence (cross-) correlation spectroscopy in live  
1504 cells and organisms. *Nat Protoc* 10, 1948-1974.

1505 Kumar, R.M., Cahan, P., Shalek, A.K., Satija, R., DaleyKeyser, A.J., Li, H., Zhang,  
1506 J., Pardee, K., Gennert, D., Trombetta, J.J., *et al.* (2014). Deconstructing  
1507 transcriptional heterogeneity in pluripotent stem cells. *Nature* 516, 56-61.

1508 Kuziora, M.A., and McGinnis, W. (1988). Autoregulation of a *Drosophila* homeotic  
1509 selector gene. *Cell* 55, 477-485.

1510 Lam, C.S., Mistri, T.K., Foo, Y.H., Sudhakaran, T., Gan, H.T., Rodda, D., Lim, L.H.,  
1511 Chou, C., Robson, P., Wohland, T., *et al.* (2012). DNA-dependent Oct4-Sox2  
1512 interaction and diffusion properties characteristic of the pluripotent cell state revealed  
1513 by fluorescence spectroscopy. *The Biochemical journal* 448, 21-33.

1514 Le, T., Liang, Z., Patel, H., Yu, M.H., Sivasubramaniam, G., Sloviitt, M., Tanentzapf,  
1515 G., Mohanty, N., Paul, S.M., Wu, V.M., *et al.* (2006). A new family of *Drosophila*

1516 balancer chromosomes with a w- dfd-GMR yellow fluorescent protein marker.  
1517 *Genetics* *174*, 2255-2257.

1518 Levine, M., Hafen, E., Garber, R.L., and Gehring, W.J. (1983). Spatial distribution of  
1519 Antennapedia transcripts during *Drosophila* development. *EMBO J* *2*, 2037-2046.

1520 Li, Y., Wang, F., Lee, J.A., and Gao, F.B. (2006). MicroRNA-9a ensures the precise  
1521 specification of sensory organ precursors in *Drosophila*. *Genes Dev* *20*, 2793-2805.

1522 Little, S.C., Tikhonov, M., and Gregor, T. (2013). Precise developmental gene  
1523 expression arises from globally stochastic transcriptional activity. *Cell* *154*, 789-800.

1524 Lo, C.A., Kays, I., Emran, F., Lin, T.J., Cvetkovska, V., and Chen, B.E. (2015).  
1525 Quantification of Protein Levels in Single Living Cells. *Cell reports* *13*, 2634-2644.

1526 Lucas, T., Ferraro, T., Roelens, B., De Las Heras Chanes, J., Walczak, A.M.,  
1527 Coppey, M., and Dostatni, N. (2013). Live imaging of bicoid-dependent transcription  
1528 in *Drosophila* embryos. *Current biology : CB* *23*, 2135-2139.

1529 Mistri, T.K., Devasia, A.G., Chu, L.T., Ng, W.P., Halbritter, F., Colby, D., Martynoga,  
1530 B., Tomlinson, S.R., Chambers, I., Robson, P., *et al.* (2015). Selective influence of  
1531 Sox2 on POU transcription factor binding in embryonic and neural stem cells. *EMBO*  
1532 *reports* *16*, 1177-1191.

1533 Morin, X., Daneman, R., Zavortink, M., and Chia, W. (2001). A protein trap strategy  
1534 to detect GFP-tagged proteins expressed from their endogenous loci in *Drosophila*.  
1535 *Proc Natl Acad Sci U S A* *98*, 15050-15055.

1536 Muller, C.B., Loman, A., Pacheco, V., Koberling, F., Willbold, D., Richtering, W., and  
1537 Enderlein, J. (2008). Precise measurement of diffusion by multi-color dual-focus  
1538 fluorescence correlation spectroscopy. *Epl-Europhys Lett* *83*.

1539 Muller, M., Affolter, M., Leupin, W., Otting, G., Wuthrich, K., and Gehring, W.J.  
1540 (1988). Isolation and sequence-specific DNA binding of the Antennapedia  
1541 homeodomain. *EMBO J* 7, 4299-4304.

1542 Nevozhay, D., Adams, R.M., Murphy, K.F., Josic, K., and Balazsi, G. (2009).  
1543 Negative autoregulation linearizes the dose-response and suppresses the  
1544 heterogeneity of gene expression. *Proc Natl Acad Sci U S A* 106, 5123-5128.

1545 Newman, J.R., Ghaemmaghami, S., Ihmels, J., Breslow, D.K., Noble, M., DeRisi,  
1546 J.L., and Weissman, J.S. (2006). Single-cell proteomic analysis of *S. cerevisiae*  
1547 reveals the architecture of biological noise. *Nature* 441, 840-846.

1548 Organista, M.F., Martin, M., de Celis, J.M., Barrio, R., Lopez-Varea, A., Esteban, N.,  
1549 Casado, M., and de Celis, J.F. (2015). The Spalt Transcription Factors Generate the  
1550 Transcriptional Landscape of the *Drosophila melanogaster* Wing Pouch Central  
1551 Region. *PLoS genetics* 11, e1005370.

1552 Papadopoulos, D.K., Krmpot, A.J., Nikolic, S.N., Krautz, R., Terenius, L., Tomancak,  
1553 P., Rigler, R., Gehring, W.J., and Vukojevic, V. (2015). Probing the kinetic landscape  
1554 of Hox transcription factor-DNA binding in live cells by massively parallel  
1555 Fluorescence Correlation Spectroscopy. *Mechanisms of development* 138 Pt 2, 218-  
1556 225.

1557 Papadopoulos, D.K., Resendez-Perez, D., Cardenas-Chavez, D.L., Villanueva-  
1558 Segura, K., Canales-del-Castillo, R., Felix, D.A., Funfschilling, R., and Gehring, W.J.  
1559 (2011). Functional synthetic Antennapedia genes and the dual roles of YPWM motif  
1560 and linker size in transcriptional activation and repression. *Proc Natl Acad Sci U S A*  
1561 108, 11959-11964.

- 1562 Papadopoulos, D.K., Skouloudaki, K., Adachi, Y., Samakovlis, C., and Gehring, W.J.  
1563 (2012). Dimer formation via the homeodomain is required for function and specificity  
1564 of Sex combs reduced in *Drosophila*. *Dev Biol* 367, 78-89.
- 1565 Papadopoulos, D.K., Vukojevic, V., Adachi, Y., Terenius, L., Rigler, R., and Gehring,  
1566 W.J. (2010). Function and specificity of synthetic Hox transcription factors in vivo.  
1567 *Proc Natl Acad Sci U S A* 107, 4087-4092.
- 1568 Pare, A., Lemons, D., Kosman, D., Beaver, W., Freund, Y., and McGinnis, W.  
1569 (2009). Visualization of individual Scr mRNAs during *Drosophila* embryogenesis  
1570 yields evidence for transcriptional bursting. *Current biology : CB* 19, 2037-2042.
- 1571 Pelaez, N., Gavalda-Miralles, A., Wang, B., Navarro, H.T., Gudjonson, H., Rebay, I.,  
1572 Dinner, A.R., Katsaggelos, A.K., Amaral, L.A., and Carthew, R.W. (2015). Dynamics  
1573 and heterogeneity of a fate determinant during transition towards cell differentiation.  
1574 *eLife* 4.
- 1575 Perez-Camps, M., Tian, J., Chng, S.C., Sem, K.P., Sudhakaran, T., Teh, C.,  
1576 Wachsmuth, M., Korzh, V., Ahmed, S., and Reversade, B. (2016). Quantitative  
1577 imaging reveals real-time Pou5f3-Nanog complexes driving dorsoventral  
1578 mesendoderm patterning in zebrafish. *eLife* 5.
- 1579 Plachta, N., Bollenbach, T., Pease, S., Fraser, S.E., and Pantazis, P. (2011). Oct4  
1580 kinetics predict cell lineage patterning in the early mammalian embryo. *Nat Cell Biol*  
1581 13, 117-123.
- 1582 Quinones-Coello, A.T., Petrella, L.N., Ayers, K., Melillo, A., Mazzalupo, S., Hudson,  
1583 A.M., Wang, S., Castiblanco, C., Buszczak, M., Hoskins, R.A., *et al.* (2007).  
1584 Exploring strategies for protein trapping in *Drosophila*. *Genetics* 175, 1089-1104.
- 1585 Raj, A., and van Oudenaarden, A. (2009). Single-molecule approaches to stochastic  
1586 gene expression. *Annual review of biophysics* 38, 255-270.

- 1587 Ryoo, H.D., and Mann, R.S. (1999). The control of trunk Hox specificity and activity  
1588 by Extradenticle. *Genes Dev* 13, 1704-1716.
- 1589 Saffman, E.E., and Krasnow, M.A. (1994). A differential response element for the  
1590 homeotics at the Antennapedia P1 promoter of Drosophila. *Proc Natl Acad Sci U S A*  
1591 91, 7420-7424.
- 1592 Sanchez, A., Garcia, H.G., Jones, D., Phillips, R., and Kondev, J. (2011). Effect of  
1593 promoter architecture on the cell-to-cell variability in gene expression. *PLoS*  
1594 *computational biology* 7, e1001100.
- 1595 Sarov, M., Barz, C., Jambor, H., Hein, M.Y., Schmied, C., Suchold, D., Stender, B.,  
1596 Janosch, S., K, J.V., Krishnan, R.T., *et al.* (2016). A genome-wide resource for the  
1597 analysis of protein localisation in Drosophila. *eLife* 5, e12068.
- 1598 Schindelin, J., Arganda-Carreras, I., Frise, E., Kaynig, V., Longair, M., Pietzsch, T.,  
1599 Preibisch, S., Rueden, C., Saalfeld, S., Schmid, B., *et al.* (2012). Fiji: an open-source  
1600 platform for biological-image analysis. *Nat Methods* 9, 676-682.
- 1601 Schwanhausser, B., Busse, D., Li, N., Dittmar, G., Schuchhardt, J., Wolf, J., Chen,  
1602 W., and Selbach, M. (2011). Global quantification of mammalian gene expression  
1603 control. *Nature* 473, 337-342.
- 1604 Sheth, R., Bastida, M.F., Kmita, M., and Ros, M. (2014). "Self-Regulation," A New  
1605 Facet of Hox Genes' Function. *Dev Dynam* 243, 182-191.
- 1606 Shimoga, V., White, J.T., Li, Y., Sontag, E., and Bleris, L. (2013). Synthetic  
1607 mammalian transgene negative autoregulation. *Mol Syst Biol* 9, 670.
- 1608 Slattery, M., Voutev, R., Ma, L., Negre, N., White, K.P., and Mann, R.S. (2013).  
1609 Divergent transcriptional regulatory logic at the intersection of tissue growth and  
1610 developmental patterning. *PLoS genetics* 9, e1003753.

1611 Smolander, O.P., Kandhavelu, M., Mannerstrom, H., Lihavainen, E., Kalaichelvan,  
1612 S., Healy, S., Yli-Harja, O., Karp, M., and Ribeiro, A.S. (2011). Cell-to-cell diversity in  
1613 protein levels of a gene driven by a tetracycline inducible promoter. *BMC molecular*  
1614 *biology* 12, 21.

1615 Stroehler, V.L., Gaiser, J.C., and Garber, R.L. (1988). Alternative RNA splicing that is  
1616 spatially regulated: generation of transcripts from the Antennapedia gene of  
1617 *Drosophila melanogaster* with different protein-coding regions. *Molecular and cellular*  
1618 *biology* 8, 4143-4154.

1619 Suter, D.M., Molina, N., Gatfield, D., Schneider, K., Schibler, U., and Naef, F. (2011).  
1620 Mammalian genes are transcribed with widely different bursting kinetics. *Science*  
1621 332, 472-474.

1622 Swain, P.S., Elowitz, M.B., and Siggia, E.D. (2002). Intrinsic and extrinsic  
1623 contributions to stochasticity in gene expression. *Proc Natl Acad Sci U S A* 99,  
1624 12795-12800.

1625 Szaloki, N., Krieger, J.W., Komaromi, I., Toth, K., and Vamosi, G. (2015). Evidence  
1626 for Homodimerization of the c-Fos Transcription Factor in Live Cells Revealed by  
1627 Fluorescence Microscopy and Computer Modeling. *Molecular and cellular biology*  
1628 35, 3785-3798.

1629 Taniguchi, Y., Choi, P.J., Li, G.W., Chen, H., Babu, M., Hearn, J., Emili, A., and Xie,  
1630 X.S. (2010). Quantifying *E. coli* proteome and transcriptome with single-molecule  
1631 sensitivity in single cells. *Science* 329, 533-538.

1632 Thattai, M., and van Oudenaarden, A. (2001). Intrinsic noise in gene regulatory  
1633 networks. *Proc Natl Acad Sci U S A* 98, 8614-8619.

1634 Tiwari, M., Mikuni, S., Muto, H., and Kinjo, M. (2013). Determination of dissociation  
1635 constant of the NFkappaB p50/p65 heterodimer using fluorescence cross-correlation

1636 spectroscopy in the living cell. Biochemical and biophysical research  
1637 communications 436, 430-435.

1638 Tsutsumi, M., Muto, H., Myoba, S., Kimoto, M., Kitamura, A., Kamiya, M., Kikukawa,  
1639 T., Takiya, S., Demura, M., Kawano, K., *et al.* (2016). In vivo fluorescence correlation  
1640 spectroscopy analyses of FMBP-1, a silkworm transcription factor. FEBS open bio 6,  
1641 106-125.

1642 Vaquerizas, J.M., Kummerfeld, S.K., Teichmann, S.A., and Luscombe, N.M. (2009).  
1643 A census of human transcription factors: function, expression and evolution. Nat Rev  
1644 Genet 10, 252-263.

1645 Venken, K.J., Schulze, K.L., Haelterman, N.A., Pan, H., He, Y., Evans-Holm, M.,  
1646 Carlson, J.W., Levis, R.W., Spradling, A.C., Hoskins, R.A., *et al.* (2011). MiMIC: a  
1647 highly versatile transposon insertion resource for engineering *Drosophila*  
1648 *melanogaster* genes. Nat Methods 8, 737-743.

1649 Vukojevic, V., Heidkamp, M., Ming, Y., Johansson, B., Terenius, L., and Rigler, R.  
1650 (2008). Quantitative single-molecule imaging by confocal laser scanning microscopy.  
1651 Proc Natl Acad Sci U S A 105, 18176-18181.

1652 Vukojevic, V., Papadopoulos, D.K., Terenius, L., Gehring, W.J., and Rigler, R.  
1653 (2010). Quantitative study of synthetic Hox transcription factor-DNA interactions in  
1654 live cells. Proc Natl Acad Sci U S A 107, 4093-4098.

1655 Winslow, G.M., Hayashi, S., Krasnow, M., Hogness, D.S., and Scott, M.P. (1989).  
1656 Transcriptional activation by the Antennapedia and fushi tarazu proteins in cultured  
1657 *Drosophila* cells. Cell 57, 1017-1030.

1658 Wirz, J., Fessler, L.I., and Gehring, W.J. (1986). Localization of the Antennapedia  
1659 protein in *Drosophila* embryos and imaginal discs. EMBO J 5, 3327-3334.

1660 Zink, B., Engstrom, Y., Gehring, W.J., and Paro, R. (1991). Direct interaction of the  
1661 Polycomb protein with Antennapedia regulatory sequences in polytene  
1662 chromosomes of *Drosophila melanogaster*. *EMBO J* 10, 153-162.

1663

## 1664 **Supplemental information**

### 1665 Supplement 1: Background on Fluorescence Microscopy Imaging and FCS

1666 Two individually modified instruments (Zeiss, LSM 510 and 780, ConfoCor 3)  
1667 with fully integrated FCS/CLSM optical pathways were used for imaging. The  
1668 detection efficiency of CLSM imaging was significantly improved by the introduction  
1669 of APD detectors. As compared to PMTs, which are normally used as detectors in  
1670 conventional CLSM, the APDs are characterized by higher quantum yield and  
1671 collection efficiency – about 70 % in APDs as compared to 15 – 25 % in PMTs,  
1672 higher gain, negligible dark current and better efficiency in the red part of the  
1673 spectrum. Enhanced fluorescence detection efficiency enabled image collection  
1674 using fast scanning ( $1 - 5 \mu s/pixel$ ). This enhances further the signal-to-noise-ratio  
1675 by avoiding fluorescence loss due to triplet state formation, enabling fluorescence  
1676 imaging with single-molecule sensitivity. In addition, low laser intensities  
1677 ( $150 - 750 \mu W$ ) could be applied for imaging, significantly reducing the photo-toxicity  
1678 (Vukojevic et al., 2008).

1679 FCS measurements are performed by recording fluorescence intensity  
1680 fluctuations in a very small, approximately ellipsoidal observation volume element  
1681 (OVE) (about  $0.2 \mu m$  wide and  $1 \mu m$  long) that is generated in imaginal disc cells by  
1682 focusing the laser light through the microscope objective and by collecting the  
1683 fluorescence light through the same objective using a pinhole in front of the detector



1684 to block out-of-focus light. The fluorescence intensity fluctuations, caused by  
1685 fluorescently labeled molecules passing through the OVE are analyzed using  
1686 temporal autocorrelation analysis.

1687 In temporal autocorrelation analysis we first derive the autocorrelation  
1688 function  $G(\tau)$ :

$$1689 \quad G(\tau) = 1 + \frac{\langle \delta I(t) \cdot \delta I(t+\tau) \rangle}{\langle I(t) \rangle^2},$$

1690 where  $\delta I(t) = I(t) - \langle I(t) \rangle$  is the deviation from the mean intensity at time  $t$  and  
1691  $\delta I(t + \tau) = I(t + \tau) - \langle I(t) \rangle$  is the deviation from the mean intensity at time  $t + \tau$ .  
1692 For further analysis, an autocorrelation curve is derived by plotting  $G(\tau)$  as a  
1693 function of the lag time, i.e. the autocorrelation time  $\tau$ .

1694 To derive information about molecular numbers and their corresponding  
1695 diffusion time, the experimentally obtained autocorrelation curves are compared to  
1696 autocorrelation functions derived for different model systems. A model describing  
1697 free three dimensional (3D) diffusion of two components and triplet formation was  
1698 used in this study:

$$G(\tau) = 1 + \frac{1}{N} \left( \frac{1-y}{\left(1 + \frac{\tau}{\tau_{D_1}}\right) \cdot \sqrt{1 + \frac{w_{xy}^2 \tau}{w_z^2 \tau_{D_1}}}} + \frac{y}{\left(1 + \frac{\tau}{\tau_{D_2}}\right) \cdot \sqrt{1 + \frac{w_{xy}^2 \tau}{w_z^2 \tau_{D_2}}}} \right) \cdot \left( 1 + \frac{T}{1-T} \cdot e^{-\frac{\tau}{\tau_T}} \right)$$

1699 In the above equation,  $N$  is the average number of molecules in the OVE;  $y$  is the fraction of  
1700 the slowly moving Antp-eGFP molecules;  $\tau_{D_1}$  is the diffusion time of the free Antp-eGFP  
1701 molecules;  $\tau_{D_2}$  is the diffusion time of Antp-eGFP molecules undergoing interactions with the  
1702 DNA;  $w_{xy}$  and  $w_z$  are radial and axial parameters, respectively, related to spatial properties  
1703 of the OVE;  $T$  is the average equilibrium fraction of molecules in the triplet state; and  $\tau_T$  the  
1704 triplet correlation time related to rate constants for intersystem crossing and the triplet decay.

1705 Spatial properties of the detection volume, represented by the square of the ratio of the axial  
1706 and radial parameters  $\left(\frac{w_z}{w_{xy}}\right)^2$ , are determined in calibration measurements performed  
1707 using a solution of Rhodamine 6G for which the diffusion coefficient ( $D$ ) is known to be  
1708  $D_{Rh6G} = 4.1 \cdot 10^{-10} \text{ m}^2\text{s}^{-1}$  (Muller et al., 2008). The diffusion time,  $\tau_D$ , measured by FCS, is  
1709 related to the translation diffusion coefficient  $D$  by:

1710 
$$\tau_D = \frac{w_{xy}^2}{4D}.$$

1711

1712 Supplement 2: Calculation of the concentration of endogenous TFs and average  
1713 number of molecules in imaginal disc cell nuclei from FCS measurements  
1714 (exemplified for Antp)

1715 The Observation Volume Element (OVE), which can be approximated by a  
1716 prolate ellipsoid, has a volume of:

$$V_{OVE} = \pi^{\frac{3}{2}} \cdot w_{xy}^2 \cdot z_0 = 5.57 \cdot 0.1847^2 \cdot 1 = 0.223 \cdot 10^{-18} \text{ m}^3 = 0.19 \cdot 10^{-15} \text{ L}$$

1717 Therefore, one fluorescent molecule in the OVE yields equal concentration to:

1718 
$$\frac{1}{0.19 \cdot 10^{-15}} = 5.263 \cdot 10^{15} \text{ molecules per L.}$$

1719 1 M of Antp-eGFP molecules equals  $6.022 \cdot 10^{23}$  molecules/L,

1720  $x$  M of Antp-eGFP molecules equal  $5.263 \cdot 10^{15}$  molecules/L.

1721 Therefore:

$$x = \frac{5.263 \cdot 10^{15}}{6.022 \cdot 10^{23}} = 0.874 \cdot 10^{-8} \text{ M} = 8.74 \text{ nM}$$

1722 This indicates that one molecule in the OVE corresponds to 8.74 nM  
1723 concentration.

1724 The wing disc cells within the Antp expression domain (prescutum precursors)  
1725 are not spherical, but rather ellipsoidal. Their axes were determined by fluorescence  
1726 imaging to be 1.4  $\mu\text{m}$  in the transverse dimension and 2.8  $\mu\text{m}$  in the longitudinal. The  
1727 volume of the nucleus was approximated by the volume of a prolate ellipsoid:

$$V_{nucleus} = \frac{4}{3}\pi a^2 b = \frac{4}{3} \cdot 3.14 \cdot (1.4 \cdot 10^{-6})^2 \cdot 2.8 \cdot 10^{-6} \text{ m}^3 = 22.99 \cdot 10^{-18} \text{ m}^3 \\ = 22.99 \cdot 10^{-15} \text{ L}$$

1728 Therefore, the OVE represents roughly 1/103 of the nuclear volume:

$$\frac{V_{nucleus}}{V_{OVE}} = 121$$

1729 and the number of molecules in Antp-eGFP nuclei is on the average  $57.37 \cdot 121 \approx$   
1730 6942 molecules.

1731 The concentration of Antp in the wing disc nuclei is calculated as follows:

1732 1 *mol* of Antp-eGFP molecules equals  $6.023 \cdot 10^{23}$ ,

1733 *n mol* of Antp-eGFP molecules equal 6942.

1734 Thus  $n_{Antp-eGFP} = \frac{6942}{6.022 \cdot 10^{23}} = 1152.77 \cdot 10^{-23} \text{ mol}$

1735 Thus the concentration of Antp-eGFP within the diploid wing disc nucleus will  
1736 be:

$$C_{Antp-eGFP} = \frac{1152.77 \cdot 10^{-23}}{22.99 \cdot 10^{-15}} = 50.1 \cdot 10^{-8} \text{ M} \approx 501 \text{ nM}$$

1737 Fitting of autocorrelation curves using a model for free three dimensional (3D)  
1738 diffusion of two components and triplet, revealed that on the average 63% of the total  
1739 Antp-eGFP molecules are fast moving and appear to be freely diffusing in the  
1740 nucleus, whereas 37% are slow and are likely participating in the formation of  
1741 complexes with the DNA.

1742

1743 Supplement 3: Calculation of the endogenous apparent dissociation constant of Antp  
 1744 from FCS measurements on third instar wing and leg imaginal discs

1745 The endogenously tagged Antp-eGFP TF undergoes both specific and non-  
 1746 specific interactions with DNA. Assuming that non-specific interactions precede the  
 1747 specific ones, a two-step process of consecutive reactions is anticipated (Vukojevic  
 1748 et al., 2010):

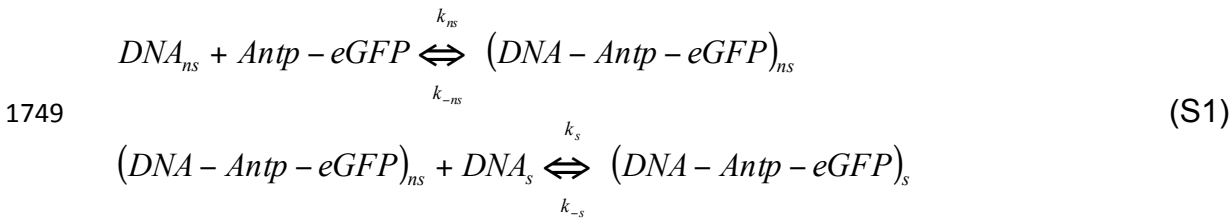

1750 The turnover rate for the non-specific complex is:

$$\begin{aligned}
 & \frac{d[(DNA - Antp - eGFP)_{ns}]}{dt} = k_{ns} \cdot [DNA_{ns}] \cdot [Antp - eGFP] - (k_{-ns} + k_s \cdot [DNA_s]) \cdot [(DNA - Antp - eGFP)_{ns}] \\
 & \quad + k_{-s} \cdot [(DNA - Antp - eGFP)_s] \tag{S2}
 \end{aligned}$$

1753 Assuming a quasi-steady state approximation:

$$\frac{d[(DNA - Antp - eGFP)_{ns}]}{dt} = 0 \tag{S3}$$

$$\begin{aligned}
 & (k_{-ns} + k_s \cdot [DNA_s]) \cdot [(DNA - Antp - eGFP)_{ns}] = k_{ns} \cdot [DNA_{ns}] \cdot [Antp - eGFP] + \\
 & \quad k_{-s} \cdot [(DNA - Antp - eGFP)_s] \tag{S4}
 \end{aligned}$$

1757 Using the mass balance equation to express the concentration of the free TF:

$$\begin{aligned}
 & [Antp - eGFP] = [Antp - eGFP]_0 - [(DNA - Antp - eGFP)_{ns}] - [(DNA - Antp - eGFP)_s] \tag{S5}
 \end{aligned}$$

1760 and assuming that:

$$[DNA]_{ns} \approx [DNA]_0 \tag{S6},$$

1762 equation (S4) becomes:

$$\begin{aligned}
 1763 \quad & (k_{-ns} + k_s \cdot [DNA_s]) \cdot [(DNA - Antp - eGFP)_{ns}] = k_{ns} \cdot [DNA]_0 \cdot [Antp - eGFP]_0 - \\
 1764 \quad & [(DNA - Antp - eGFP)_{ns}] - [(DNA - Antp - eGFP)_s] + k_{-s} \cdot [(DNA - Antp - eGFP)_s] \\
 1765 \quad & \quad \quad \quad (S7),
 \end{aligned}$$

$$\begin{aligned}
 1766 \quad & (k_{-ns} + k_s \cdot [DNA_s] + k_{ns} \cdot [DNA]_0) \cdot [(DNA - Antp - eGFP)_{ns}] = k_{ns} \cdot [DNA]_0 \cdot \\
 1767 \quad & ([Antp - eGFP]_0 - [(DNA - Antp - eGFP)_s]) + k_{-s} \cdot [(DNA - Antp - eGFP)_s] \quad (S8),
 \end{aligned}$$

$$\begin{aligned}
 1768 \quad & \\
 1769 \quad & (k_{-ns} + k_s \cdot [DNA_s] + k_{ns} \cdot [DNA]_0) \cdot [(DNA - Antp - eGFP)_{ns}] = k_{ns} \cdot [DNA]_0 \cdot \\
 1770 \quad & [Antp - eGFP]_0 - (k_{ns} \cdot [DNA]_0 - k_{-s}) \cdot [(DNA - Antp - eGFP)_s] \quad (S9),
 \end{aligned}$$

$$\begin{aligned}
 1771 \quad & \\
 1772 \quad & [(DNA - Antp - eGFP)_{ns}] = \\
 1773 \quad & \frac{k_{ns} \cdot [DNA]_0}{k_{-ns} + k_s \cdot [DNA_s] + k_{ns} \cdot [DNA]_0} \cdot [Antp - eGFP]_0 - \frac{k_{ns} \cdot [DNA]_0 - k_{-s}}{k_{-ns} + k_s \cdot [DNA_s] + k_{ns} \cdot [DNA]_0} \cdot [(DNA - Antp - \\
 1774 \quad & eGFP)_s] \quad (S10)
 \end{aligned}$$

1775 According to equation (S10) and the FCS data presented in Figure 6 M, the  
1776 slope of the linear dependence gives:

$$1777 \quad \frac{k_{ns} \cdot [DNA]_0}{k_{-ns} + k_s \cdot [DNA_s] + k_{ns} \cdot [DNA]_0} = 0.38 \quad (S11)$$

1778 and the intercept:

$$1779 \quad \frac{k_{ns} \cdot [DNA]_0 - k_{-s}}{k_{-ns} + k_s \cdot [DNA_s] + k_{ns} \cdot [DNA]_0} \cdot [(DNA - Antp - eGFP)_s] = 5.78 \text{ nM} \quad (S12)$$

1780 If  $k_{-s}$  is small compared to  $k_{ns} \cdot [DNA]_0$  and can therefore be neglected, then:

$$1781 \quad 0.38 \cdot [(DNA - Antp - eGFP)_s] = 5.78 \text{ nM} \quad (S13)$$

1782 Thus, the concentration of specific complex between Antp-eGFP and DNA in  
1783 the wing disc cell nuclei can be estimated to be:

$$1784 \quad [(DNA - Antp - eGFP)_s] = 15.26 \text{ nM} \quad (S14)$$

1785 The average concentration of free-diffusing Antp-eGFP molecules is  
1786 determined as follows:

$$\begin{aligned} 1787 \quad [Antp - eGFP]_{free} &= [Antp - eGFP]_0 - [(DNA - Antp - eGFP)_{ns}] - [(DNA - Antp - \\ 1788 \quad eGFP)_s] &= [Antp - eGFP]_0 - (0.38 \cdot [Antp - eGFP]_0 - 5.78) - [(DNA - Antp - \\ 1789 \quad eGFP)_s] &= 501 - 0.38 \cdot 501 + 5.78 - 15.26 = 301.1nM \end{aligned}$$

1790 Using the experimentally determined concentration of specific DNA–Antp-  
1791 eGFP complexes (eq. S14) and the estimated total concentration of specific DNA  
1792 binding sites derived in Supplement 6,  $[DNA]_s = 16.16 nM$ , we could estimate the  
1793 dissociation constant for the specific DNA–Antp-eGFP complex to be:

$$K_{d,Antp}^{3rd\ instar} = \frac{[DNA_s]_{free} \cdot [Antp - eGFP]_{free}}{[(DNA - Antp - eGFP)_s]} = \frac{0.9 \cdot 301.1}{15.26} \approx 18 nM$$

1794

1795 Supplement 4: Approximation of the concentration of DNA binding sites in imaginal  
1796 disc cell nuclei to which Antp can bind specifically

1797 The mean size of the *Drosophila* haploid genome is  $1.75 \cdot 10^8$  bp long (Huang  
1798 et al., 2014); this means that the diploid genome size is:  $2 \cdot 1.75 \cdot 10^8 = 3.5 \cdot 10^8$ bp  
1799 long.

1800 For specific binding to occur, usually a larger sequence is necessary. The  
1801 statistical occurrence of the binding site correlates with the size of the site, rather  
1802 than its sequence. For most Hox TF-Extradenticle (Exd) complexes, sequences  
1803 consisting of a minimum of 10 bp have been identified, bearing the Exd consensus  
1804 binding sequence (AGAT) (Ryoo and Mann, 1999). Assuming thus a minimum  
1805 requirement of 10 bp to confer Antp binding specificity, this sequence may occur  
1806 once every  $4^{10} = 1048576 \approx 1.048 \cdot 10^6$  bp in the genome.

1807 This results in  $\frac{3.5 \cdot 10^8}{1.048 \cdot 10^6} = 334$  sites within a diploid nucleus of a wing imaginal  
1808 disc cell.

1809 1 *mol* of potential sites contains  $6.022 \cdot 10^{23}$  sites

1810 *n mol* of potential sites contain 334 sites, thus:

$$n = \frac{334}{6.022 \cdot 10^{23}} = 55.46 \cdot 10^{-23} \text{ mol}$$

1811 However, the *Drosophila* heterochromatin comprises about 33% of the total  
1812 genome sequence. Therefore, only 67% of the total DNA length can be considered  
1813 as candidate sequences for TF-DNA interactions. This results in:

1814  $0.67 \cdot 55.46 \cdot 10^{-23} = 37.158 \cdot 10^{-23}$  *mol* of binding sites.

1815 Thus the concentration of specific binding sites within the diploid nucleus is:

$$C_{sites}^{specific} = \frac{n}{V_{nucleus}} = \frac{37.158 \cdot 10^{-23}}{22.99 \cdot 10^{-15}} = 1.616 \cdot 10^{-8} M = 16.16 \text{ nM}$$

1816

1817 Supplement 5: Calculation of the apparent Antp dissociation constant from FCS  
1818 measurements in endogenously-expressing and overexpressing nuclei

1819 We have calculated similar values of the apparent Antp-eGFP dissociation  
1820 constant to the value obtained by FCS measurements in third instar imaginal discs  
1821 also when the dissociation constant was calculated using the binding curve obtained  
1822 by plotting all FCS measurements on Antp: third instar wing and leg imaginal discs,  
1823 as well as overexpression in the antennal disc by all Gal4 drivers tested: *DII*-Gal4  
1824 (MD23 and MD713), *ptc*-Gal4 and *69B*-Gal4 (Figure 6 N). We calculated a slope of  
1825 0.46 and an intercept of 7.29, yielding concentration of the Antp-eGFP specific  
1826 complex:

$$[(DNA - Antp - eGFP)_s] = 15.92nM$$

1827 With an average total concentration of Antp-eGFP of  $[Antp - eGFP]_0 =$   
1828  $1849.12nM$ , the average free-diffusing Antp-eGFP TF was determined similarly in  
1829 this case to be:

$$[Antp - eGFP]_{free} = 993.59nM$$

1830 We, therefore calculated a dissociation constant of:

1831  $K_{d, Antp}^{endog.+o/e} = \frac{[DNA_s]_{free} \cdot [Antp - eGFP]_{free}}{[(DNA - Antp - eGFP)_s]} = \frac{0.24 \cdot 993.59}{15.92} = 14.98 \approx 15nM$ , very similar to the  
1832 value calculated with the binding data of homozygous, endogenous Antp-eGFP in  
1833 third instar imaginal discs.

1834

1835 Supplement 6: Calculation of the endogenous apparent Antp dissociation constant  
1836 from FCS measurements on second instar wing and leg imaginal discs

1837 We determined the endogenous apparent dissociation constant for Antp in  
1838 second instar wing and leg imaginal discs, using FCS measurements. We have  
1839 calculated a slope of 0.44 and an intercept of 2.6, yielding concentration of the Antp-  
1840 eGFP specific complex:

$$[(DNA - Antp - eGFP)_s] = 5.97nM$$

1841 With an average total concentration in second instar wing and leg disc nuclei,  
1842 Antp-eGFP of  $[Antp - eGFP]_0 = 136.05nM$ , the average free-diffusing Antp-eGFP  
1843 TF was determined similarly in this case to be:

$$[Antp - eGFP]_{free} = 76.73nM$$



1844 We, therefore calculated a dissociation constant of:

$$1845 \quad K_{d, Antp}^{2nd\ instar} = \frac{[DNA_s]_{free} \cdot [Antp-eGFP]_{free}}{[(DNA-Antp-eGFP)_s]} = \frac{10.19 \cdot 76.73}{5.97} = 130.97 \approx 131nM, \quad \text{different}$$

1846 by roughly one order of magnitude from the value obtained from FCS measurements  
1847 in third instar discs, expressing Antp endogenously or the sum of data on third instar  
1848 endogenous expression and overexpression.

1849

1850 Supplement 7: Calculation of the apparent Antp dissociation constant for short and  
1851 long linker Antp isoforms from FCS measurements on ectopically expressed Antp

1852 We determined the apparent dissociation constant for Antp short and long  
1853 linker isoforms in discs expressing Antp close to endogenous levels, using FCS  
1854 measurements.

1855 a) For the short linker Antp isoform, we have calculated a slope of 0.34 and  
1856 an intercept of 5.31, yielding concentration of the Antp-eGFP specific complex:

$$[(DNA - Antp - eGFP)_s] = 15.62nM$$

1857 With an average total concentration in second instar wing and leg disc nuclei,  
1858 Antp-eGFP of  $[Antp - eGFP]_0 = 785.28nM$ , the average free-diffusing Antp-eGFP  
1859 TF was determined similarly in this case to be:

$$[Antp - eGFP]_{free} = 507.97nM$$

1860 We, therefore calculated a dissociation constant of:

1861  $K_{d, Antp}^{short linker isof., o/e} = \frac{[DNAs]_{free} \cdot [Antp-eGFP]_{free}}{[(DNA-Antp-eGFP)_s]} = \frac{0.54 \cdot 507.97}{15.62} = 17.56 \approx 18nM$ , equal to the

1862 value calculated with the binding data of homozygous, endogenous Antp-eGFP in  
1863 third instar imaginal discs.

1864 b) For the long linker Antp isoform, we have calculated a slope of 0.24 and an  
1865 intercept of 3.28, yielding concentration of the Antp-eGFP specific complex:

$$[(DNA - Antp - eGFP)_s] = 13.67nM$$

1866 With an average total concentration in second instar wing and leg disc nuclei,  
1867 Antp-eGFP of  $[Antp - eGFP]_0 = 1382.95nM$ , the average free-diffusing Antp-eGFP  
1868 TF was determined similarly in this case to be:

$$[Antp - eGFP]_{free} = 1040.65nM$$

1869 We, therefore calculated a dissociation constant of:

1870  $K_{d, Antp}^{long linker isof., o/e} = \frac{[DNAs]_{free} \cdot [Antp-eGFP]_{free}}{[(DNA-Antp-eGFP)_s]} = \frac{2.49 \cdot 1040.65}{13.67} = 189.56 \approx 190nM$ ,

1871 different by roughly one order of magnitude from the value obtained from FCS  
1872 measurements in discs expressing the Antp short linker isoform. However, this value  
1873 was found to be similar to the value obtained from FCS measurements on second  
1874 instar leg and wing discs.

Figure 1

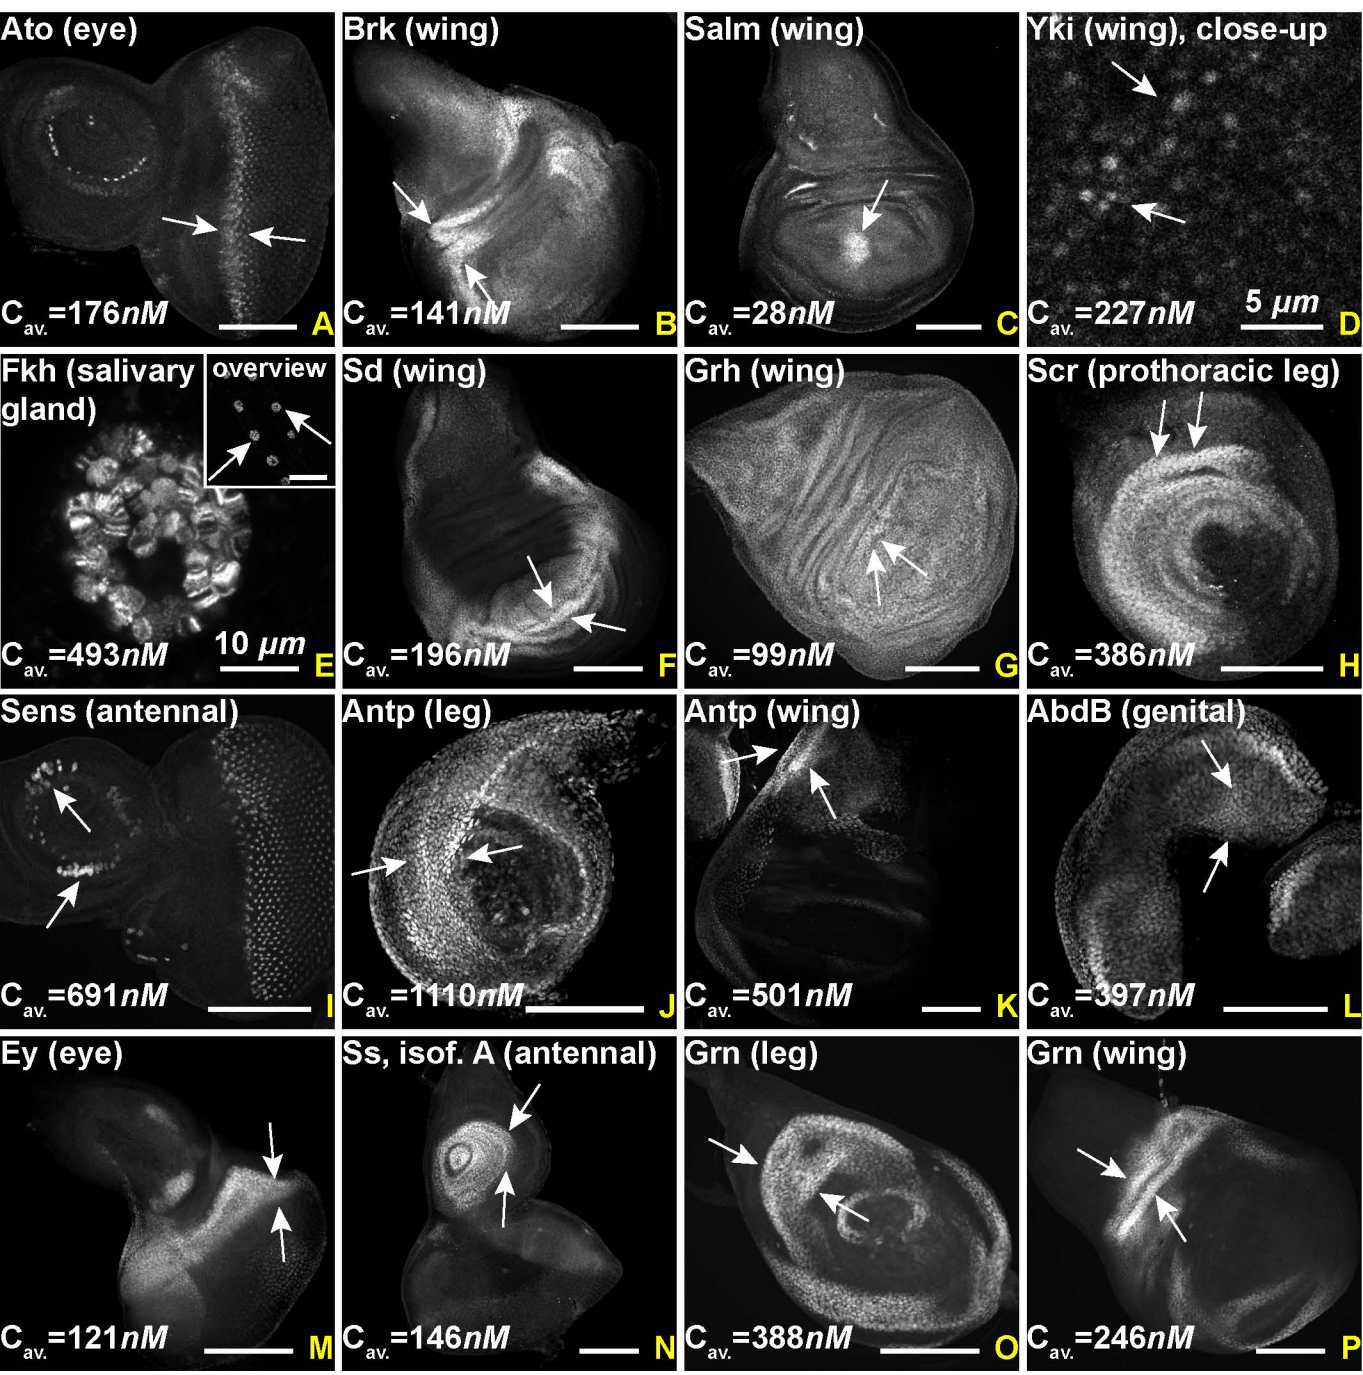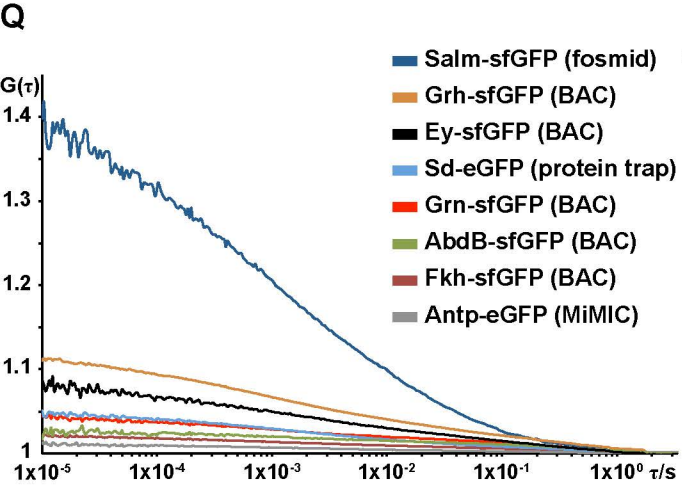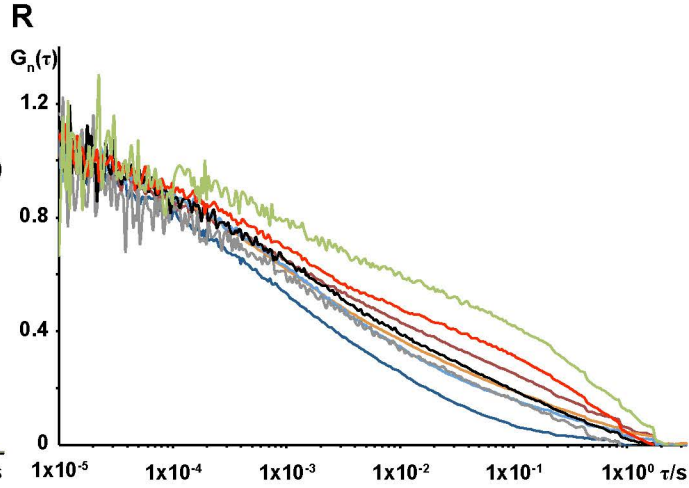

Figure 2

A

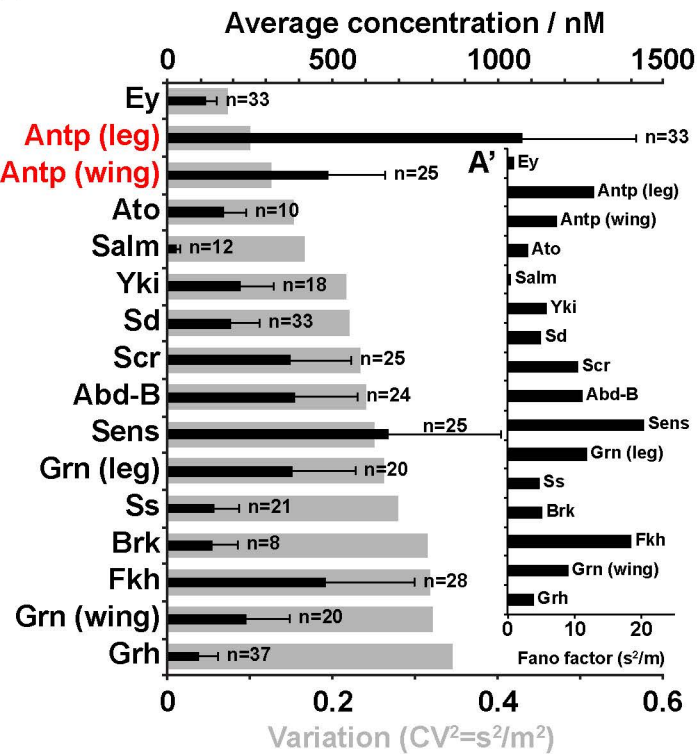

B

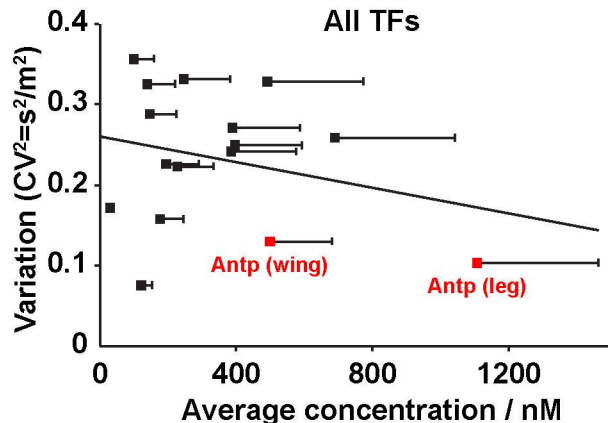

C

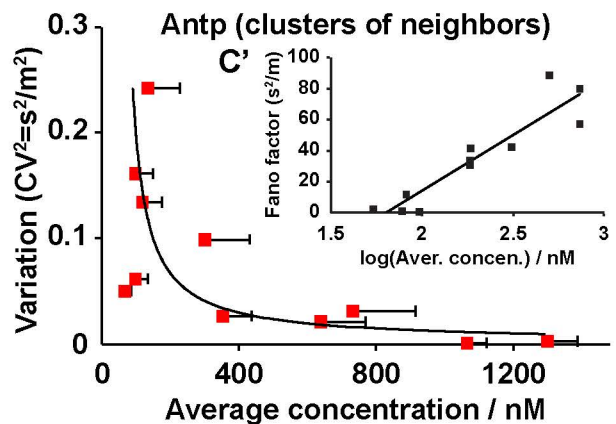



Figure 3

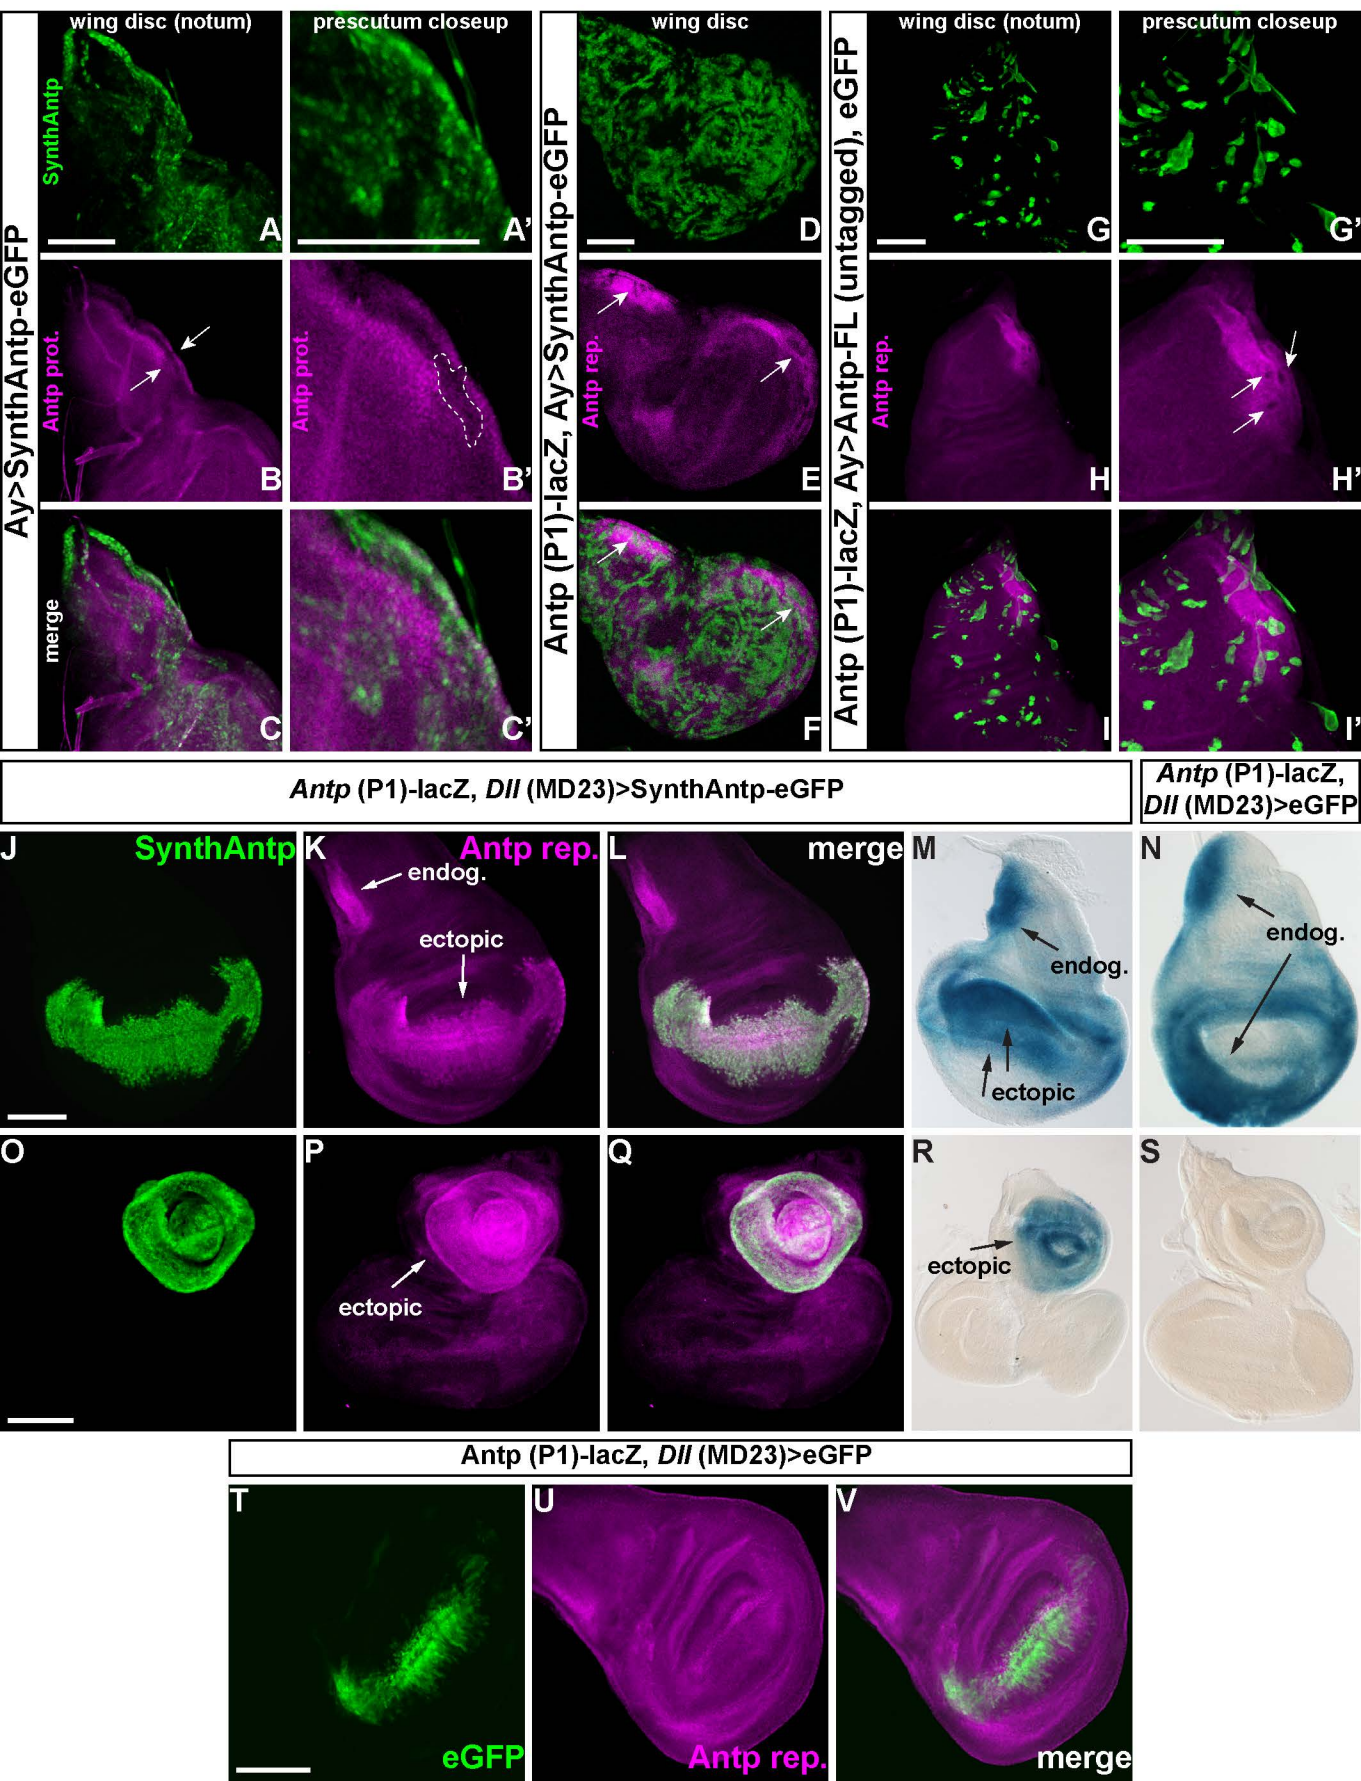

Figure 3 - figure supplement 1

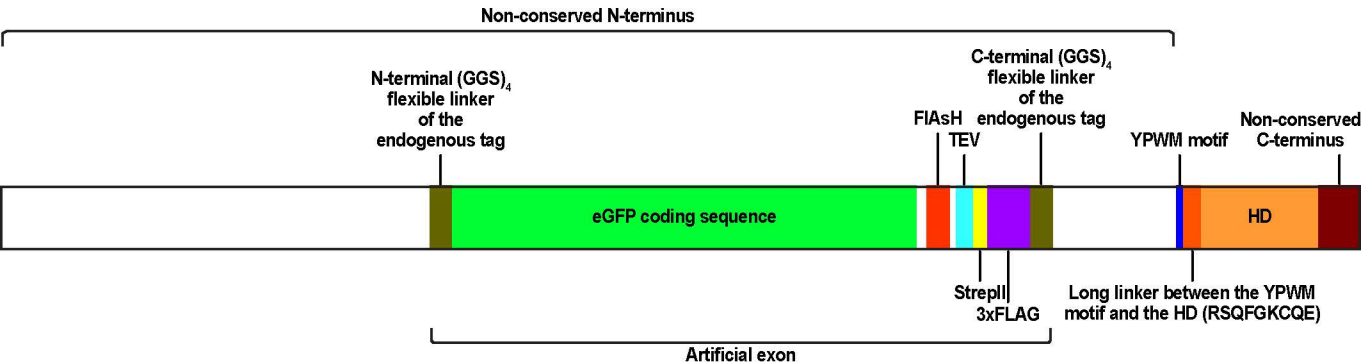



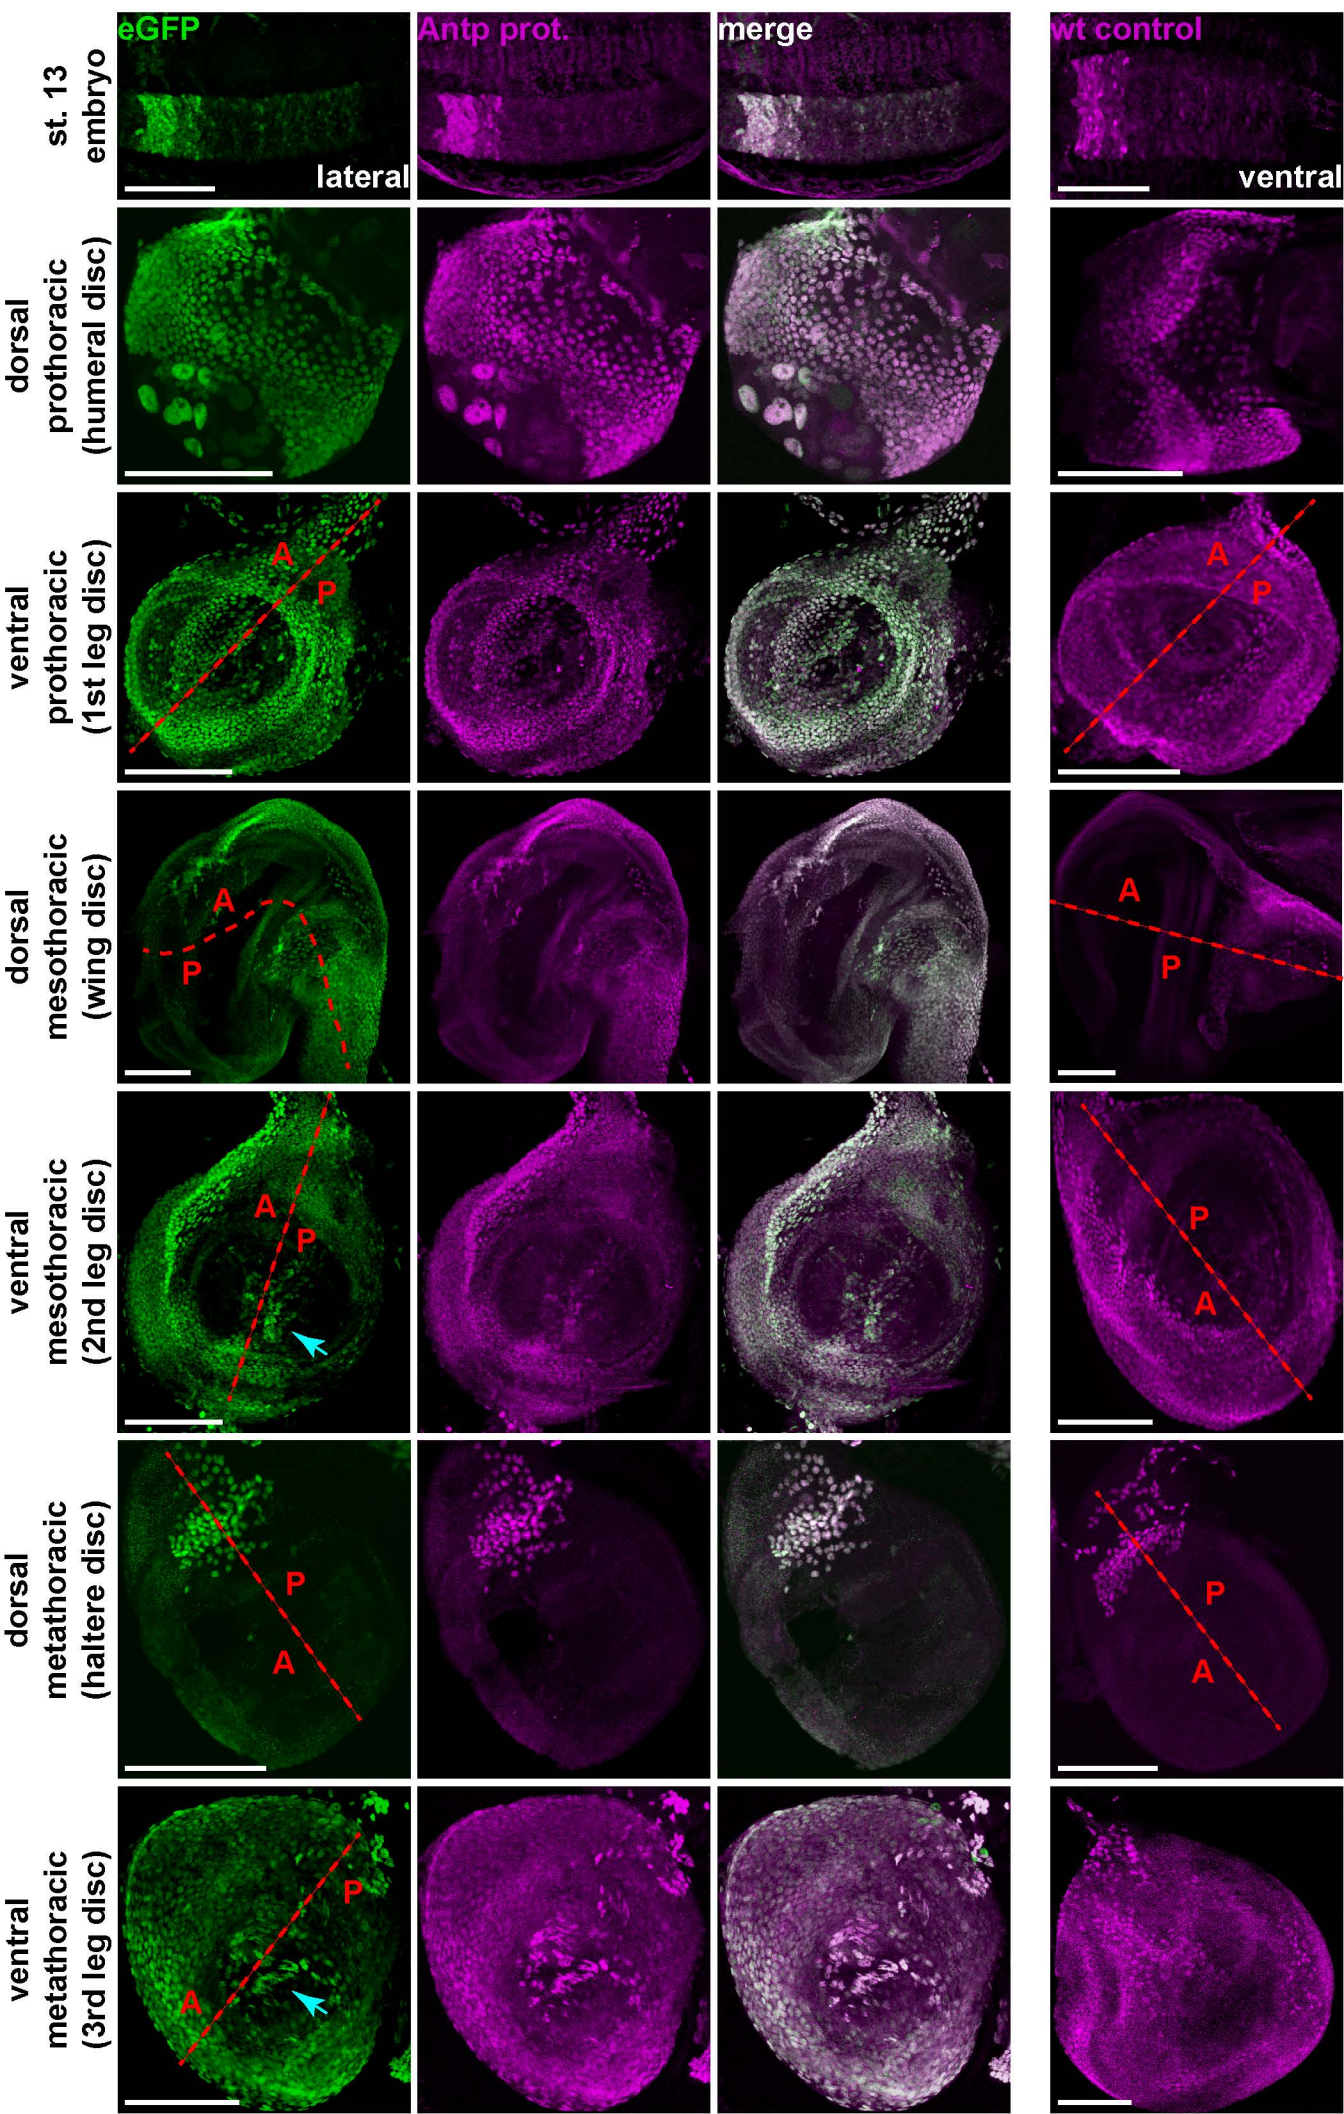



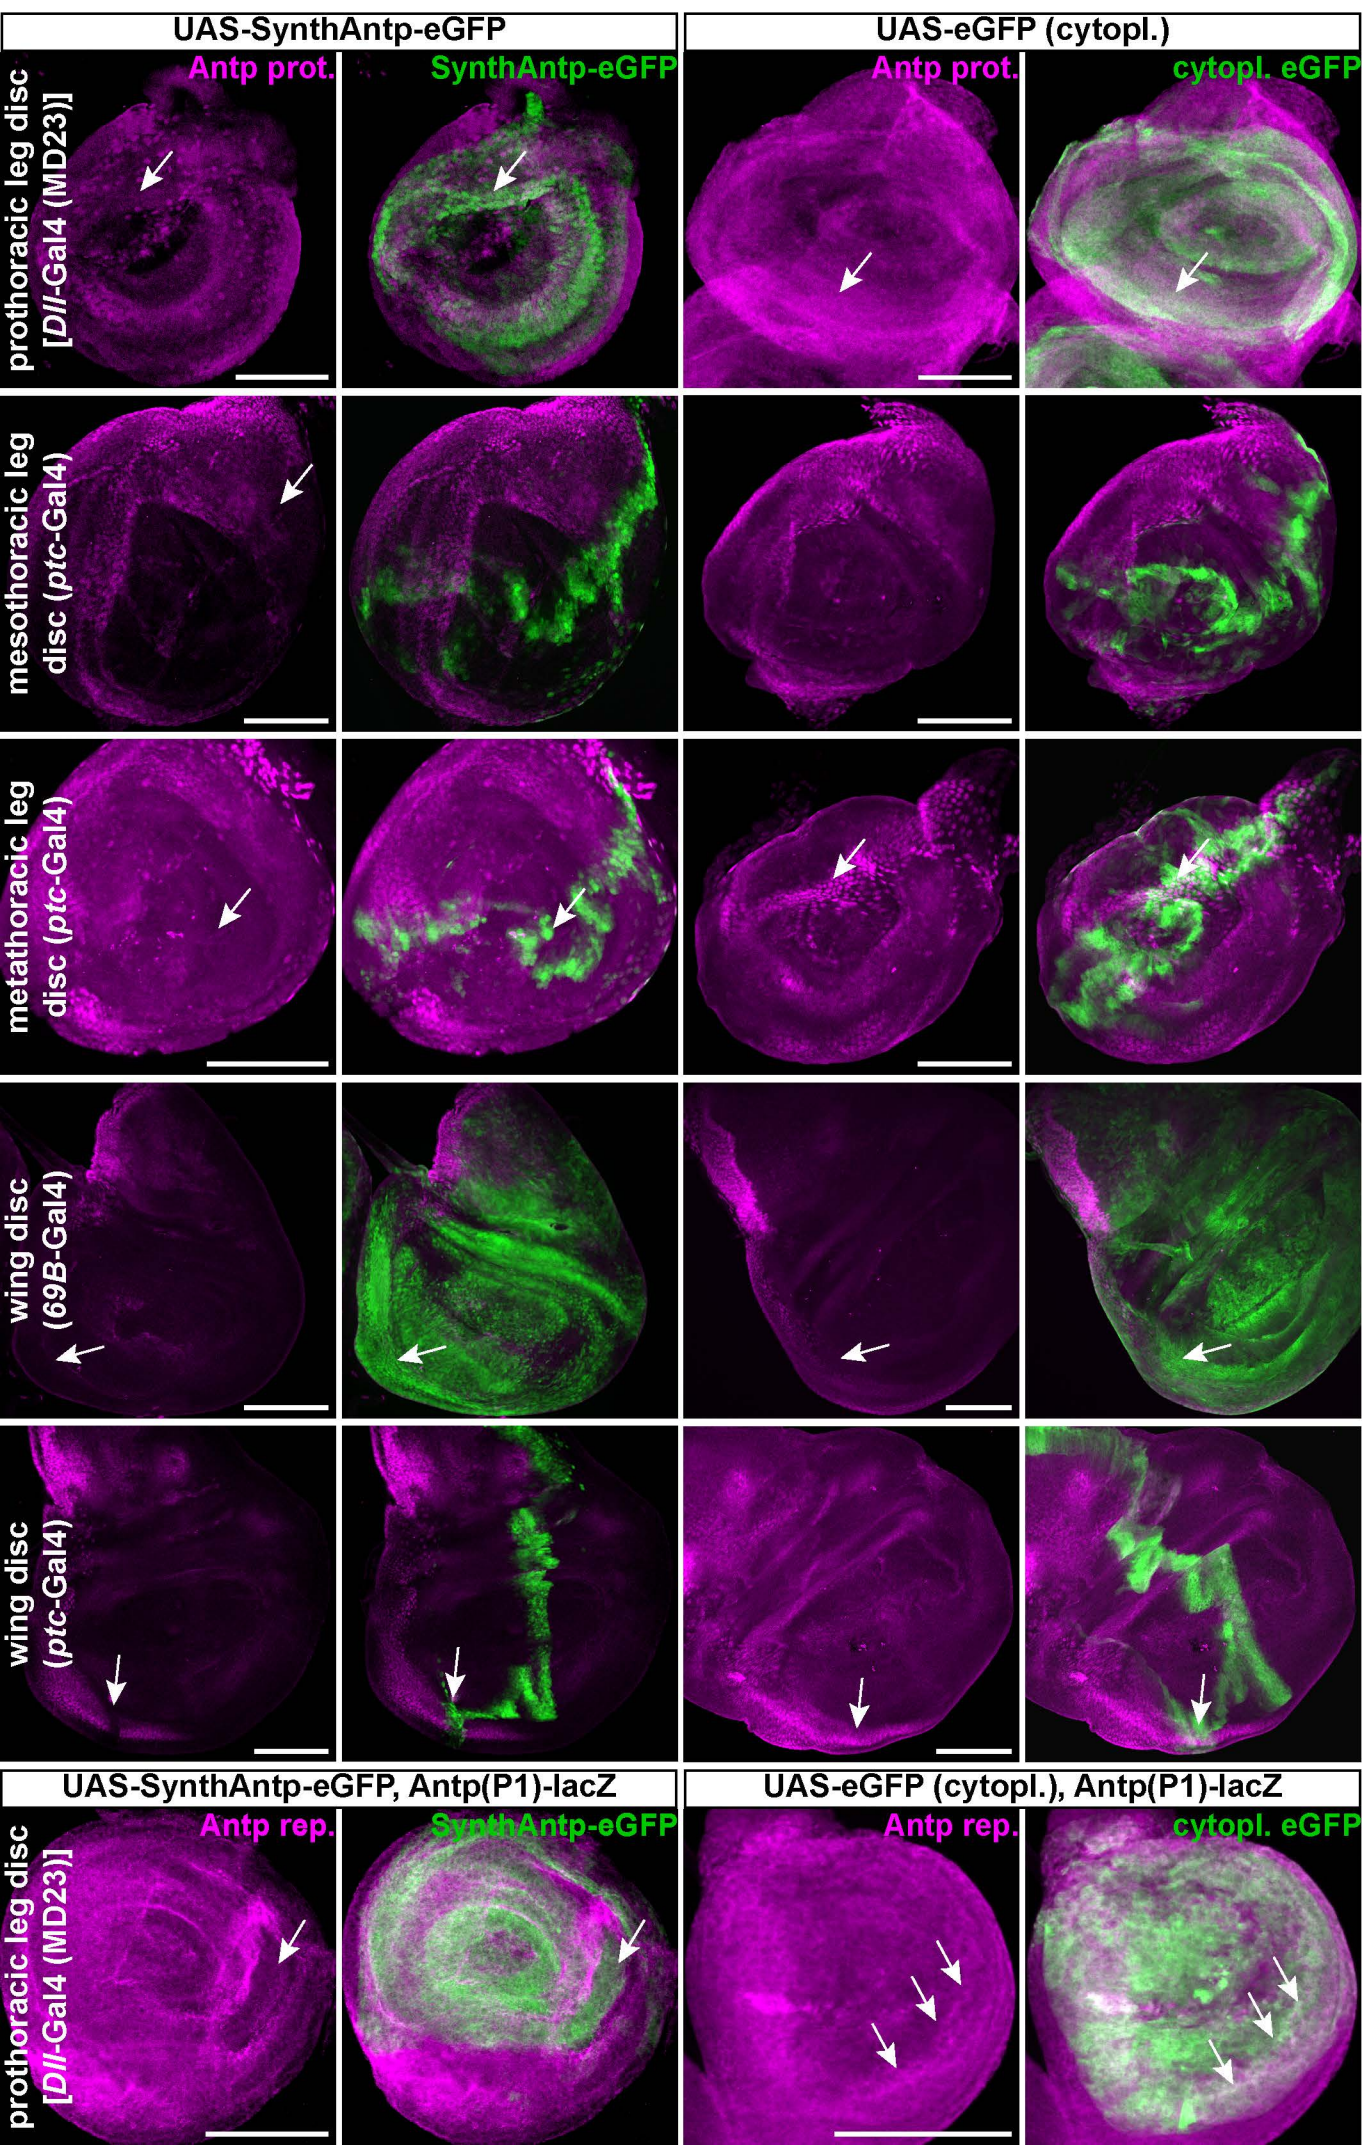



Figure 3 - figure supplement 4

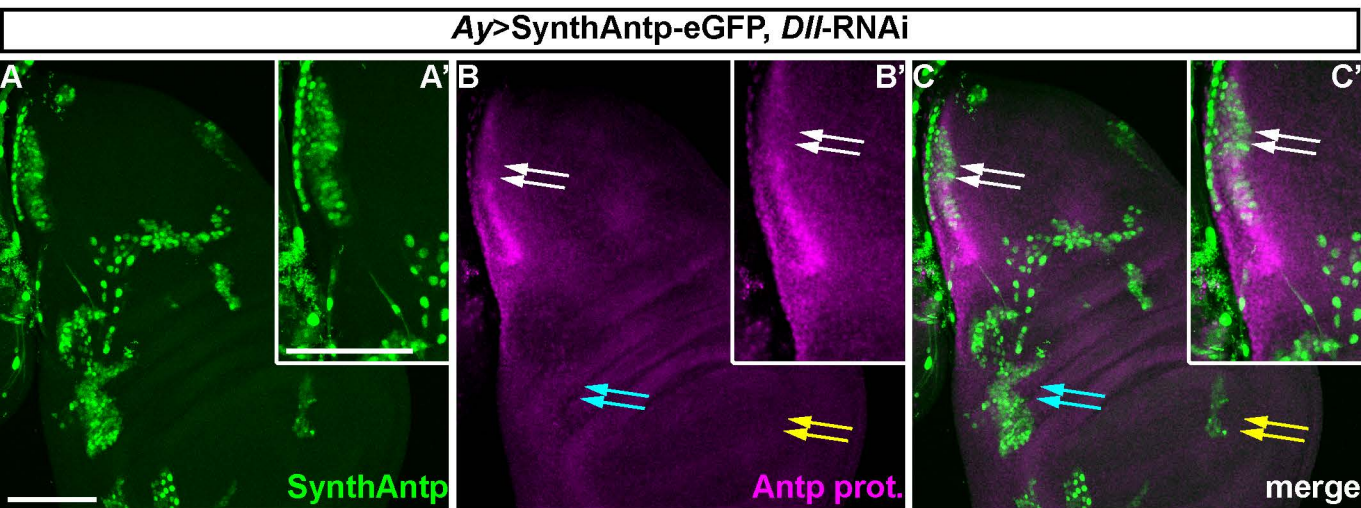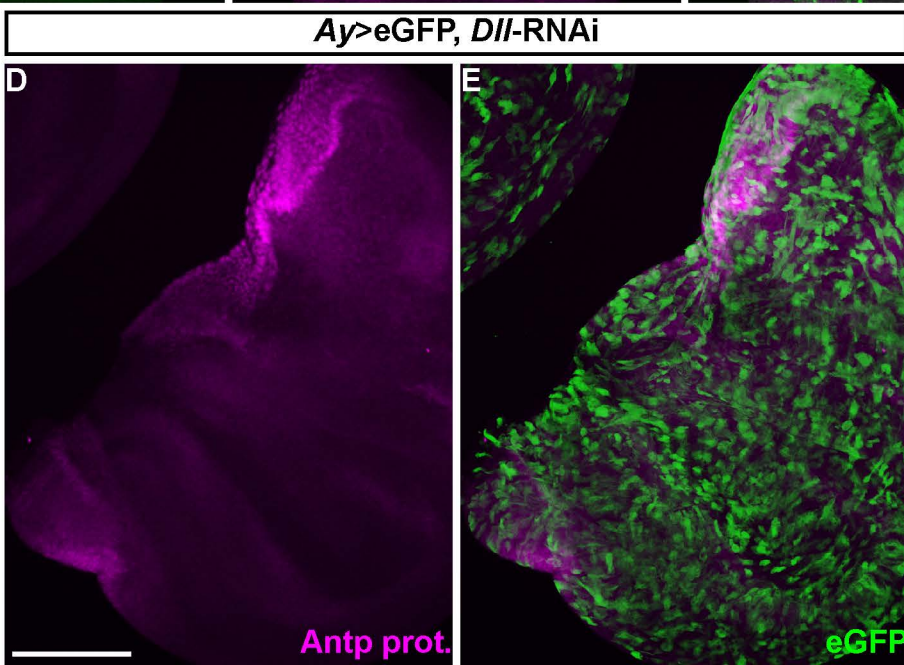

**Figure 4**

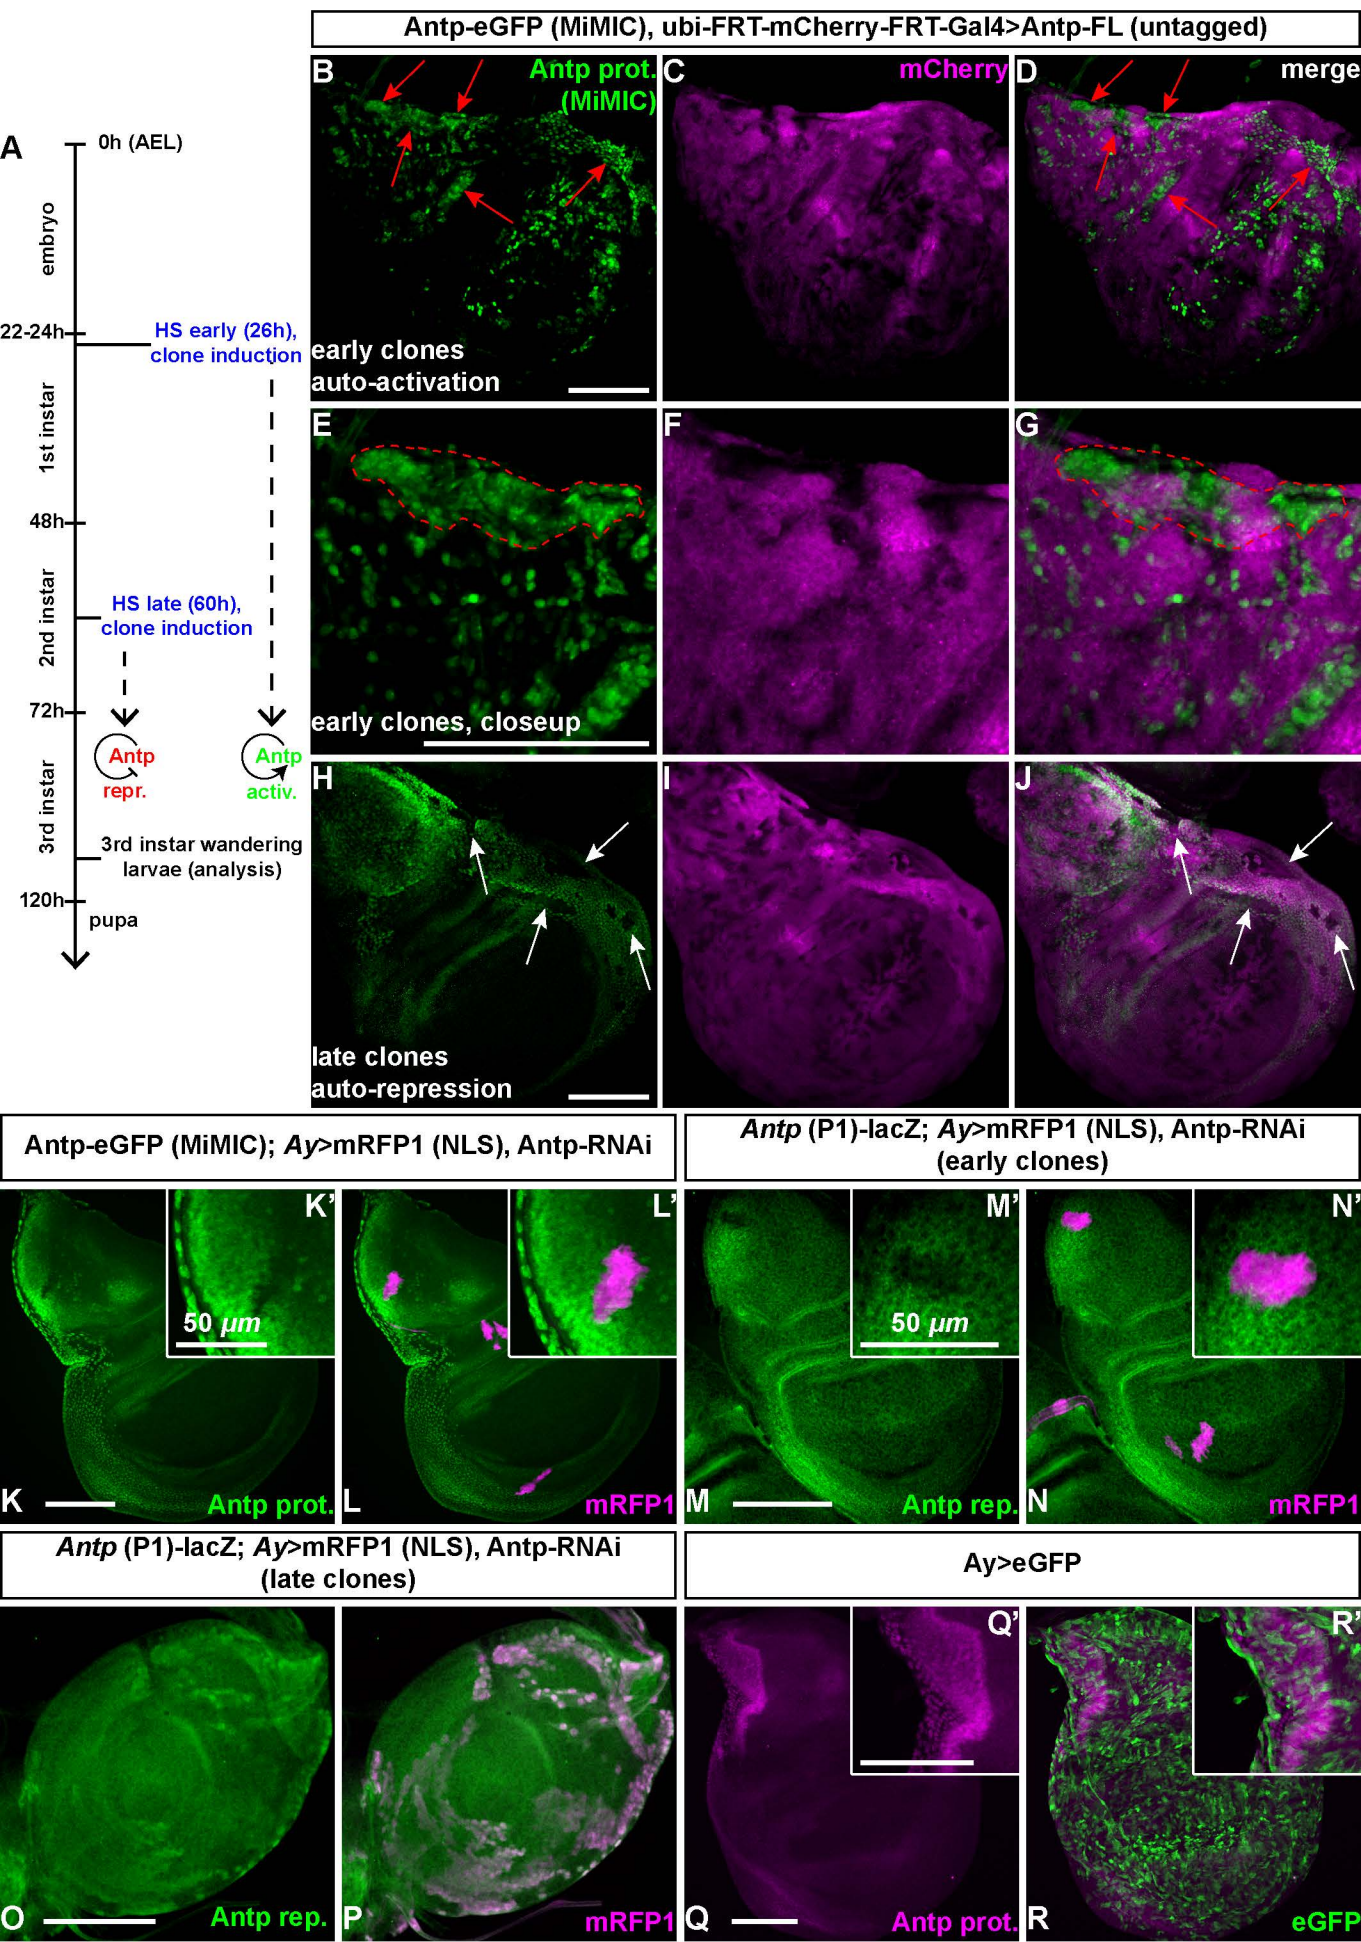



Figure 4 - figure supplement 1

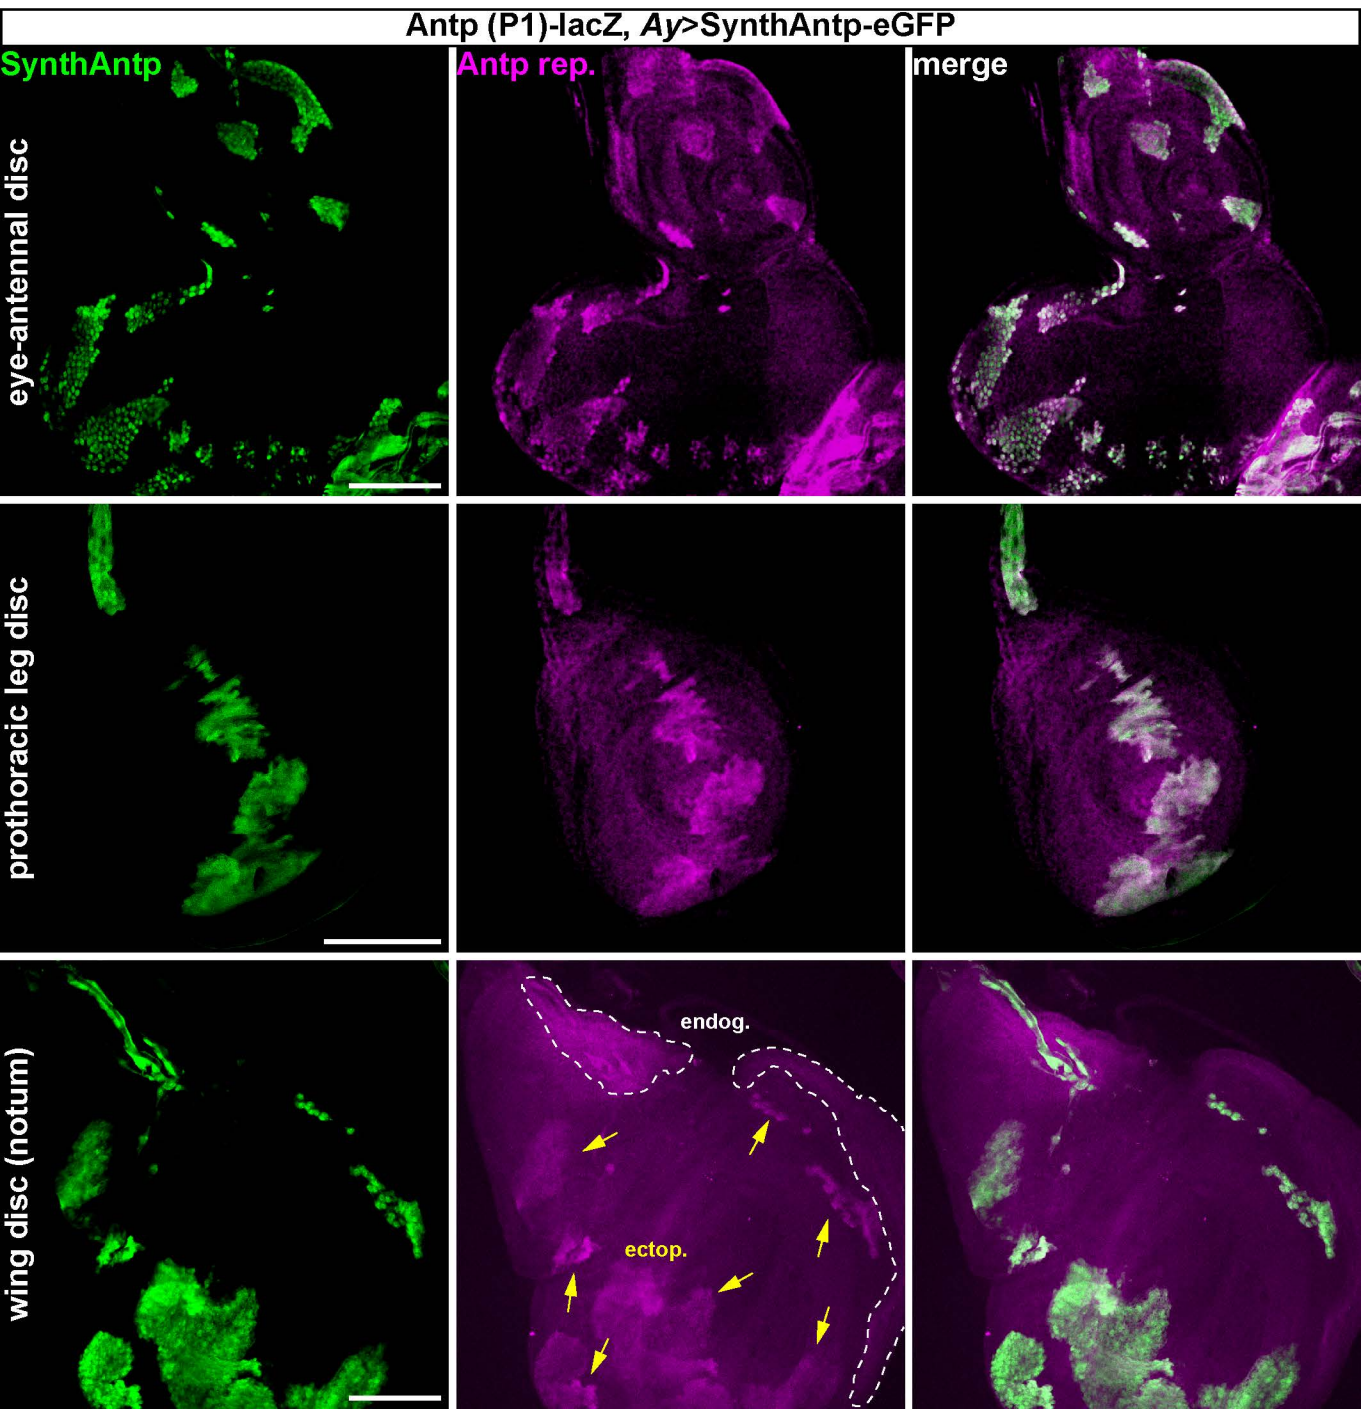

Figure 5

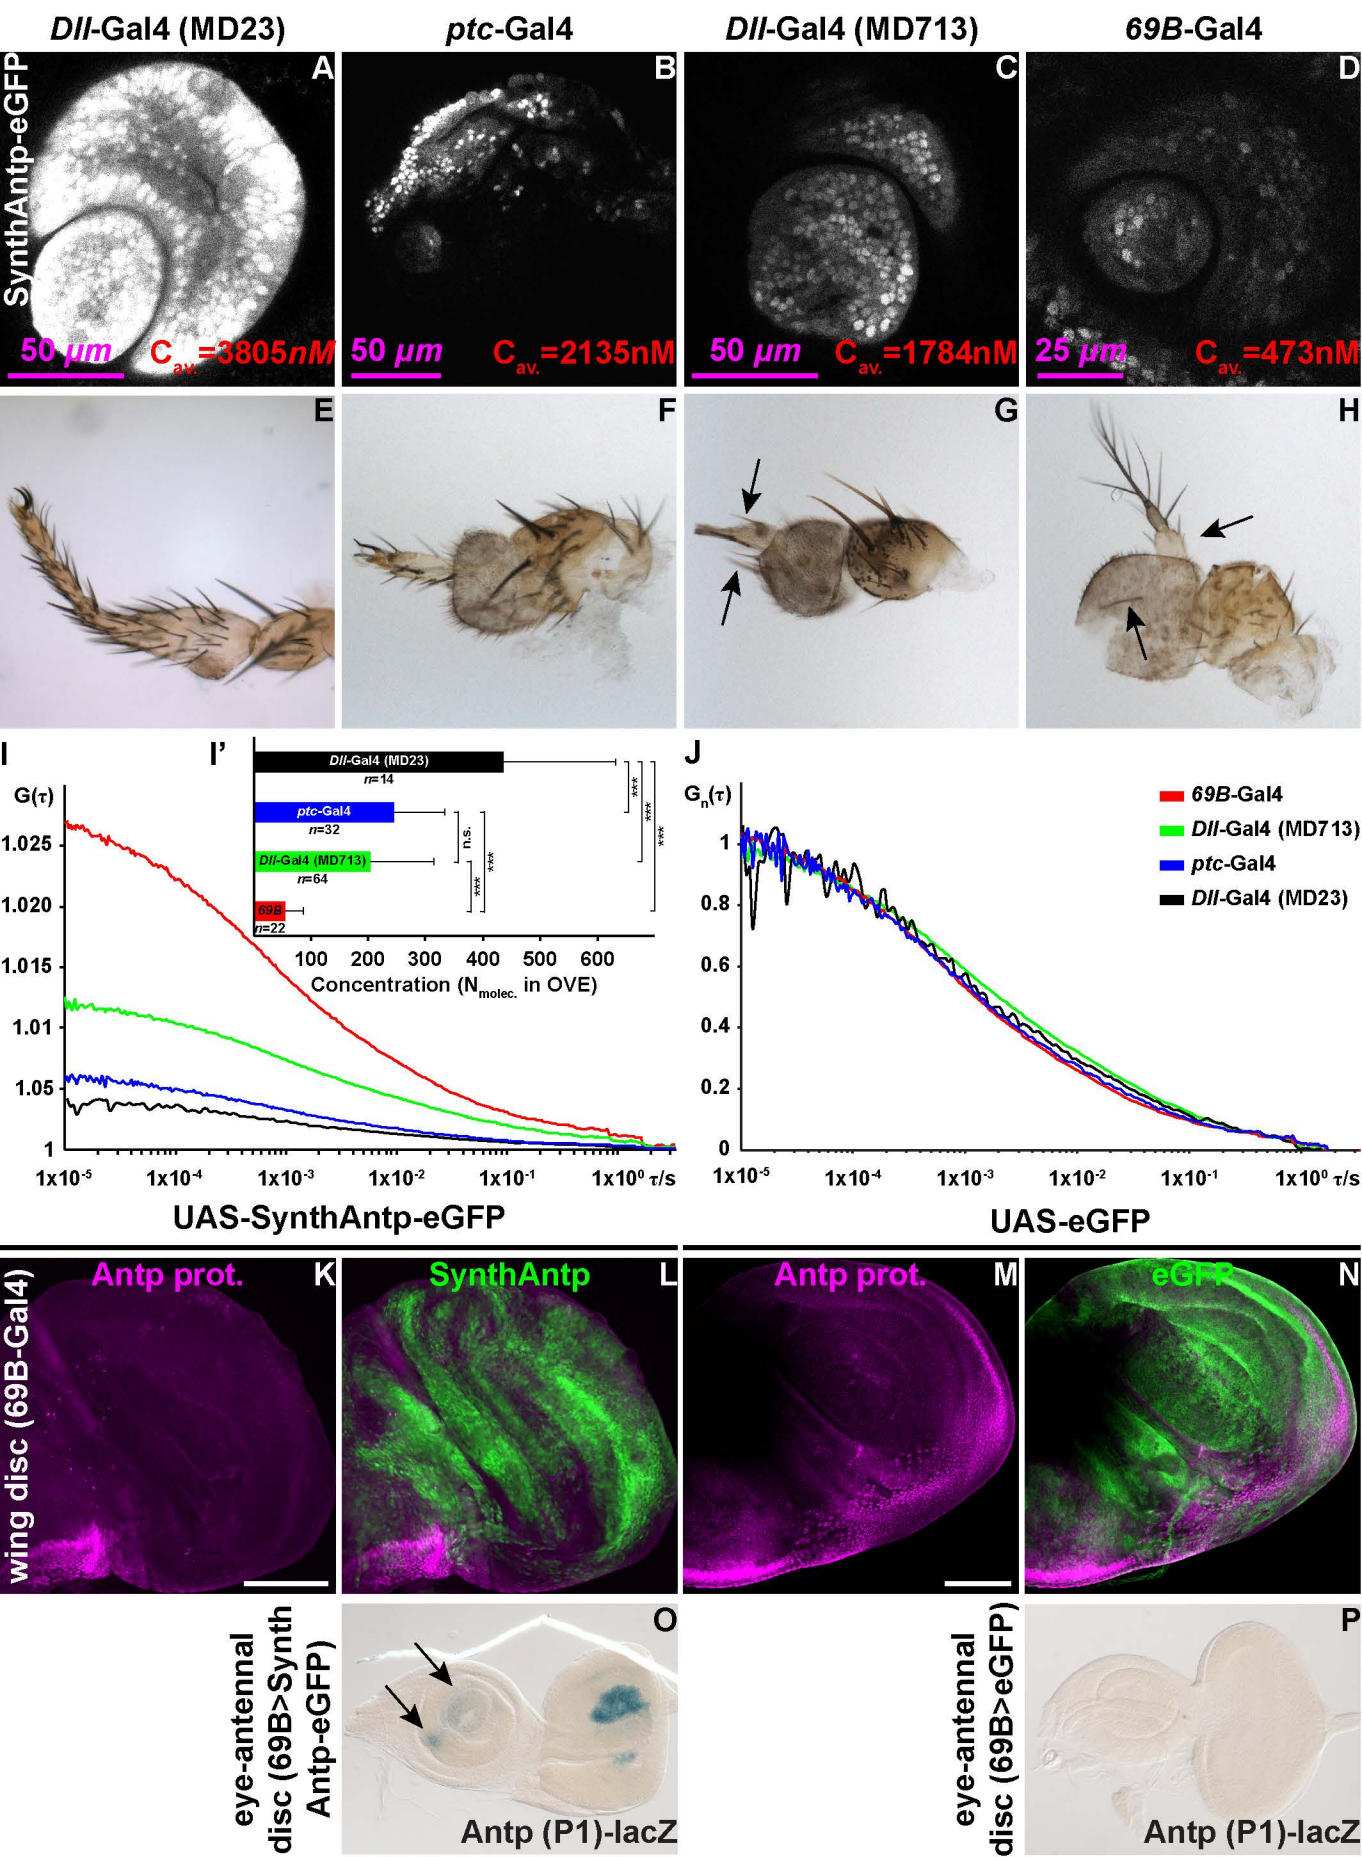



Figure 5 - figure supplement 1

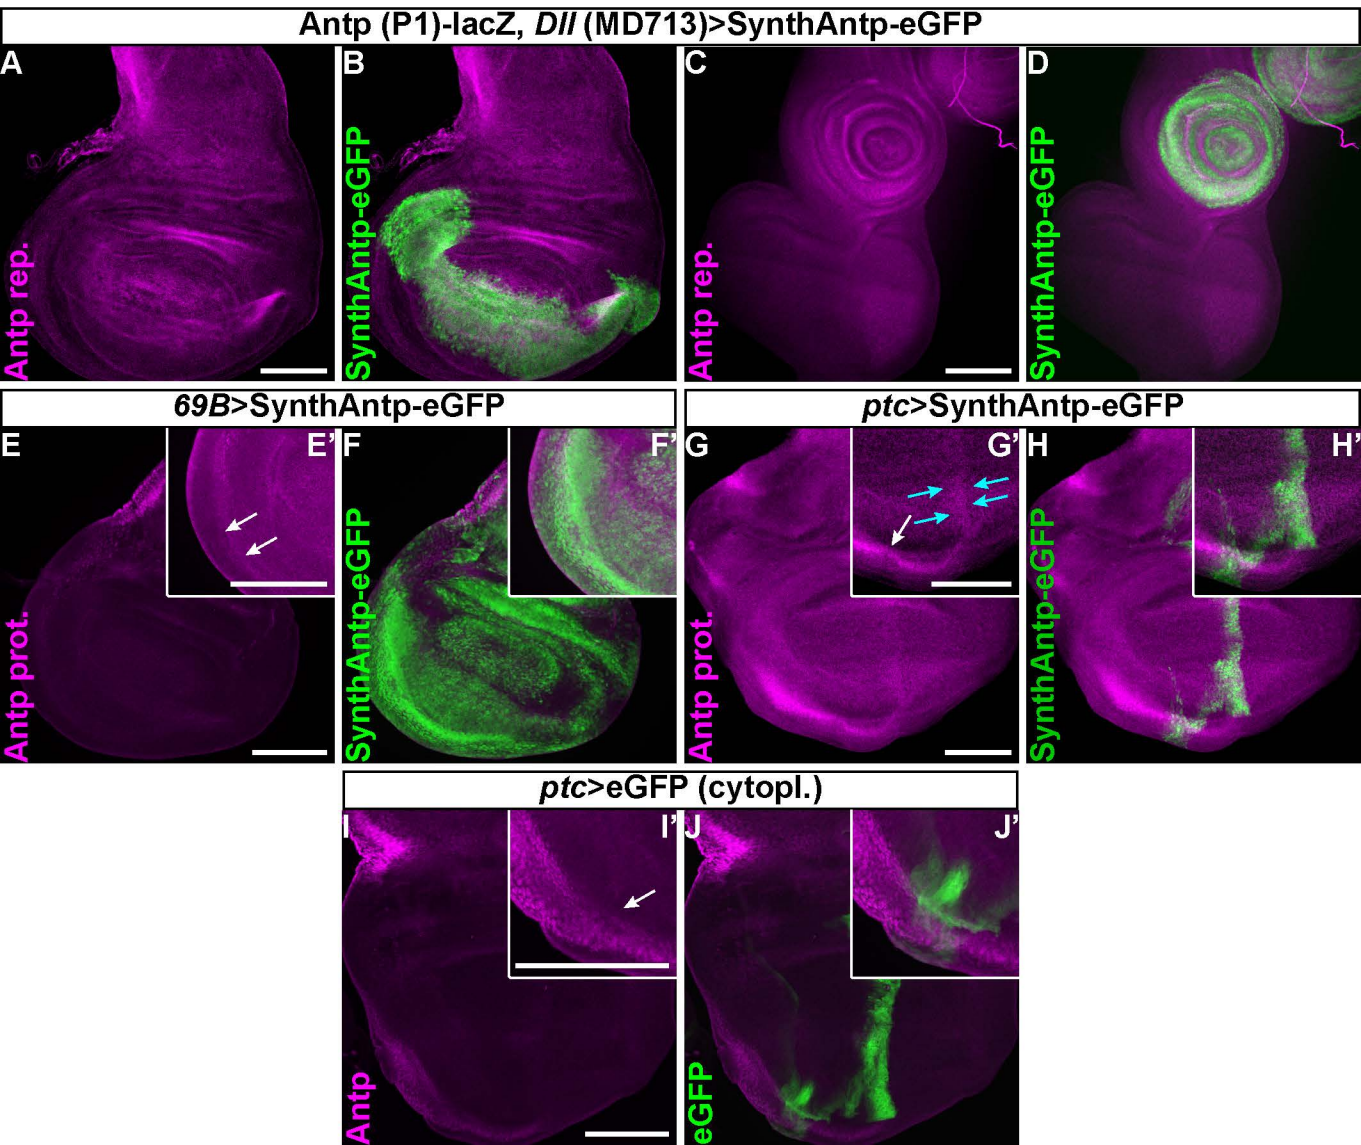

**Figure 6**

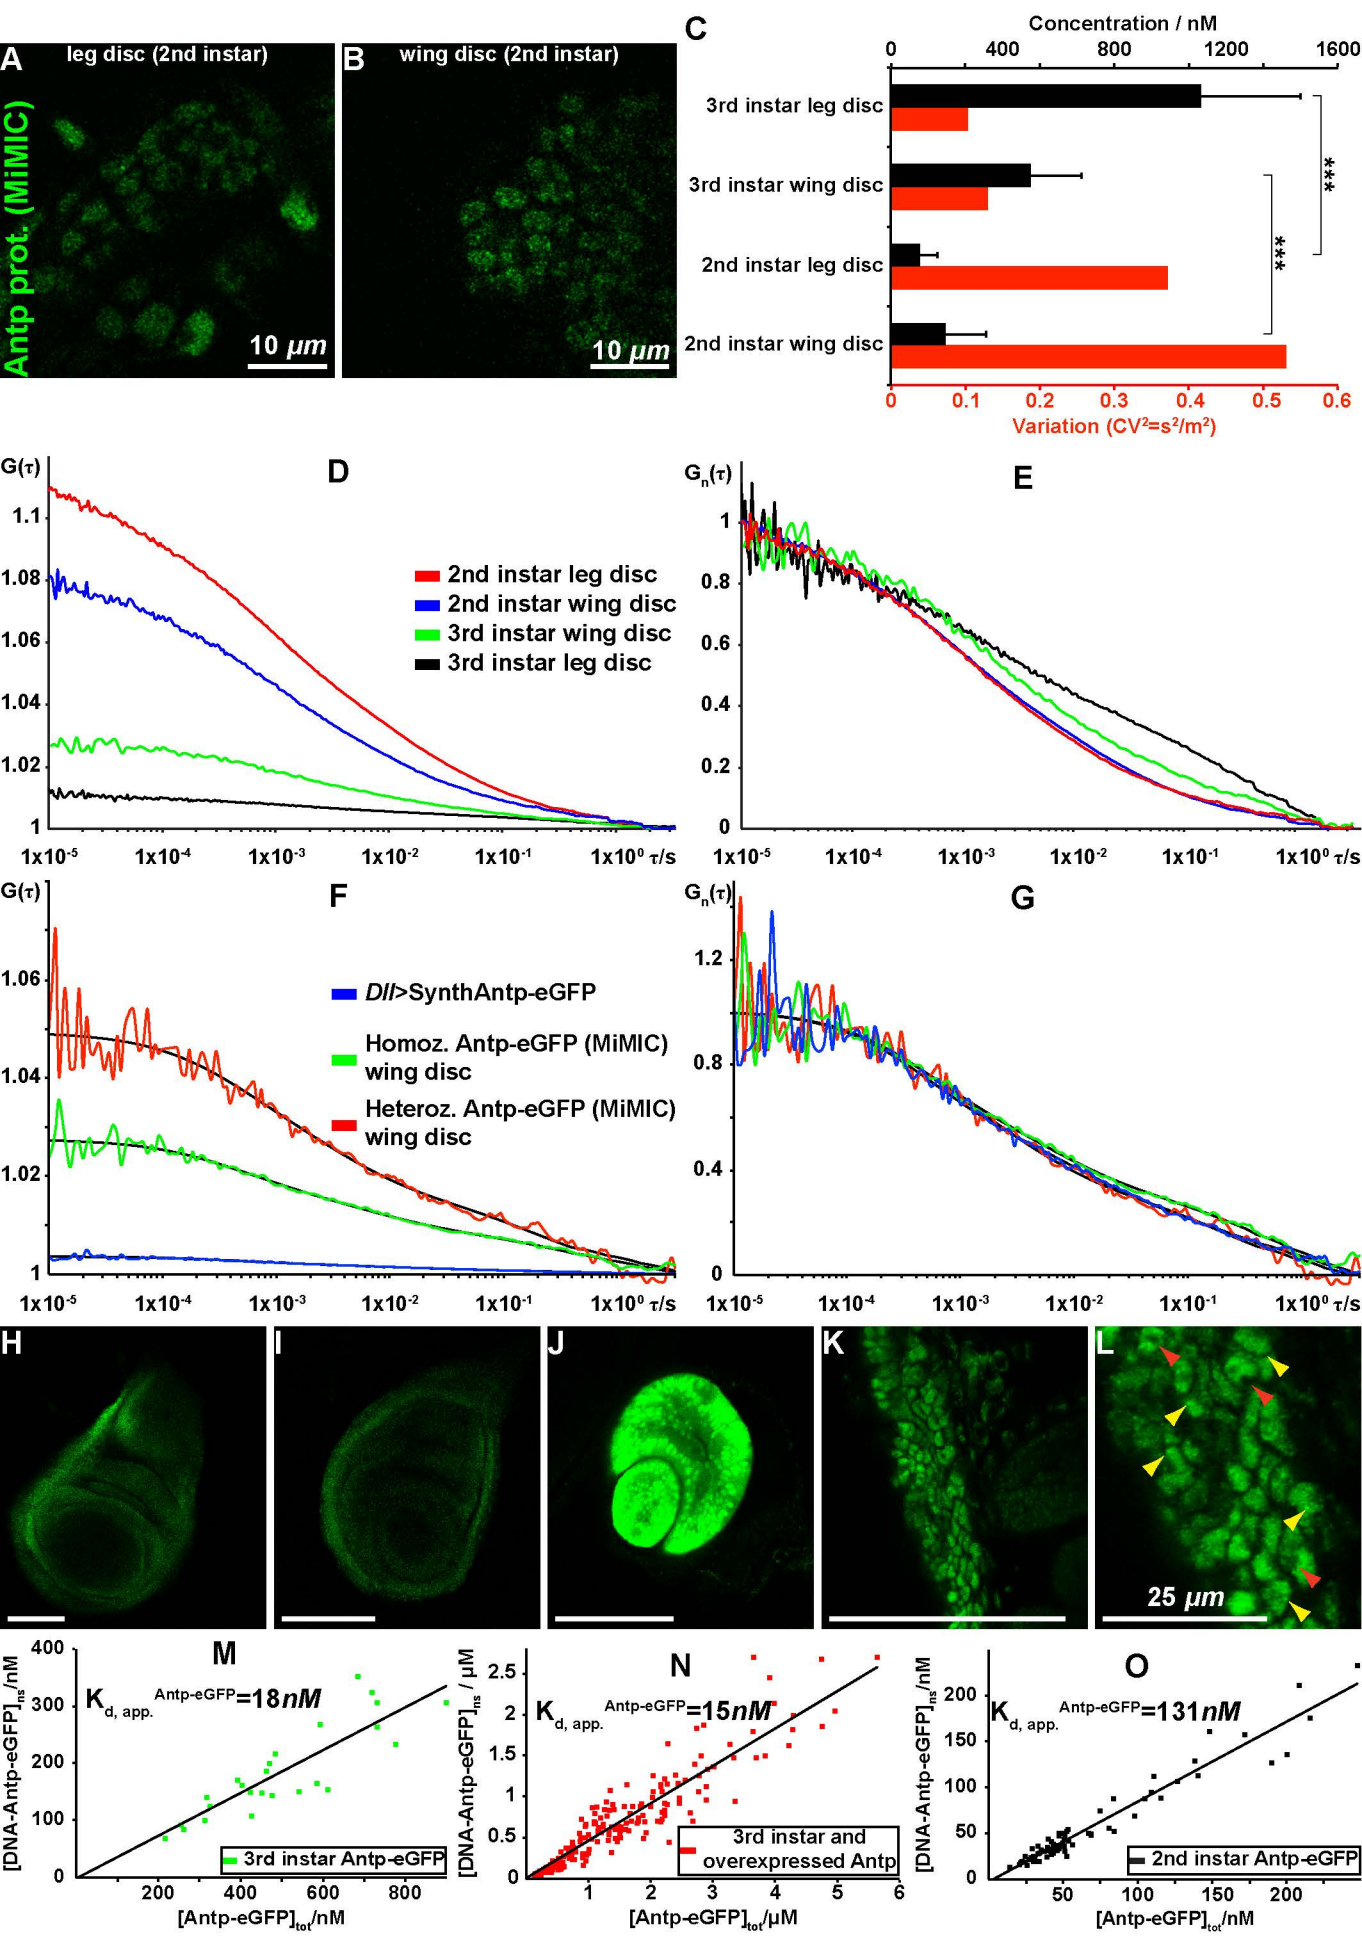

Figure 6 - figure supplement 1

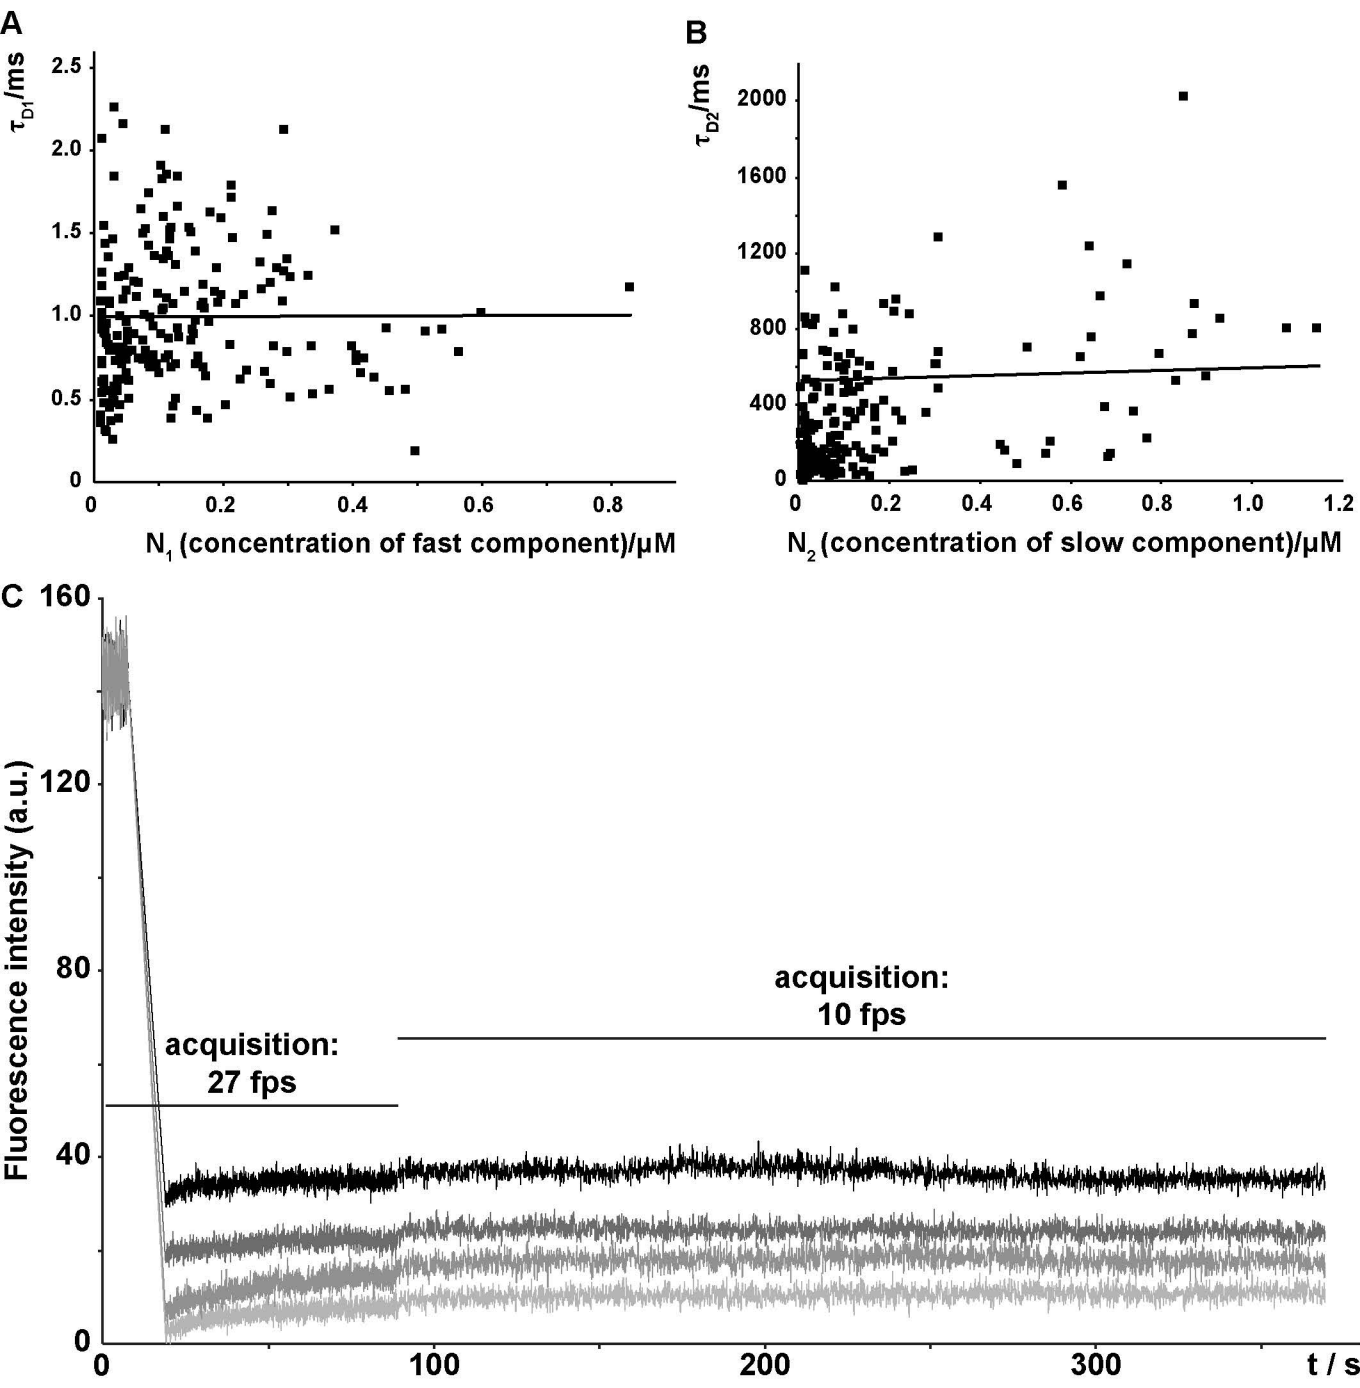

Figure 6 - figure supplement 2

A

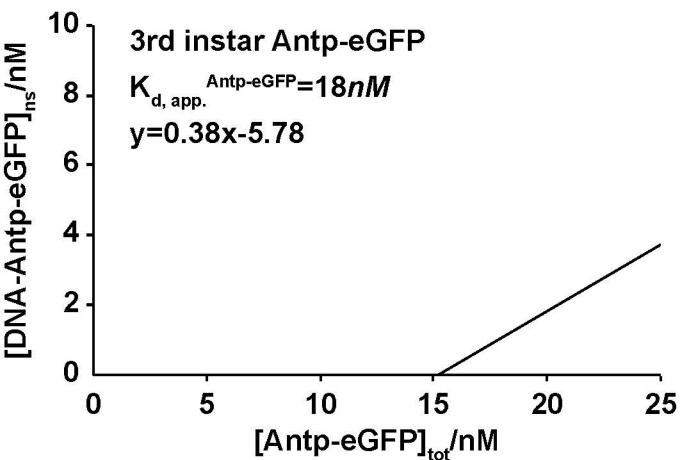

B

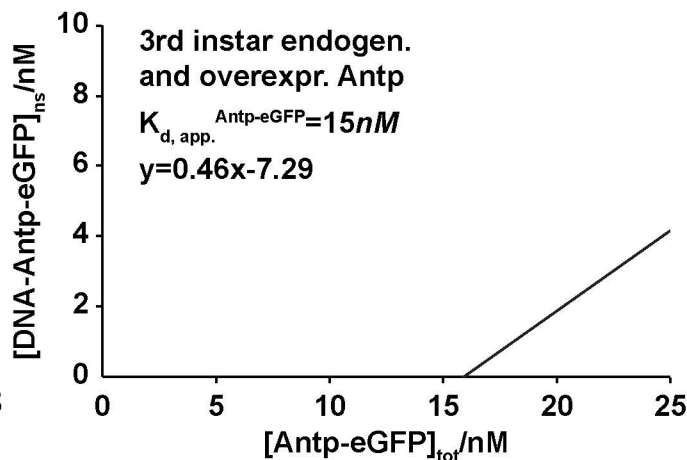

C

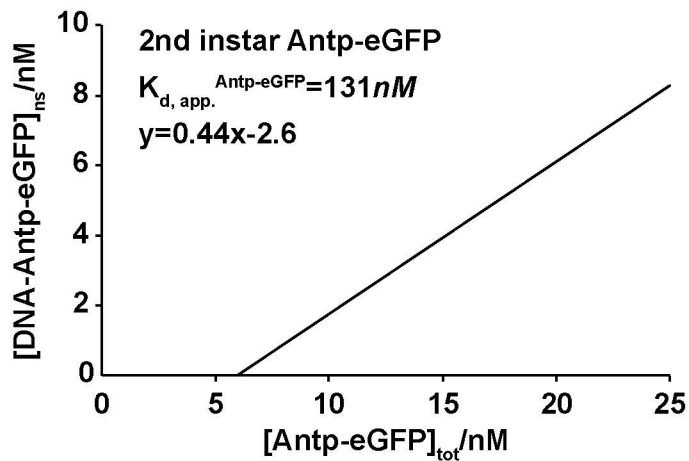



Figure 7

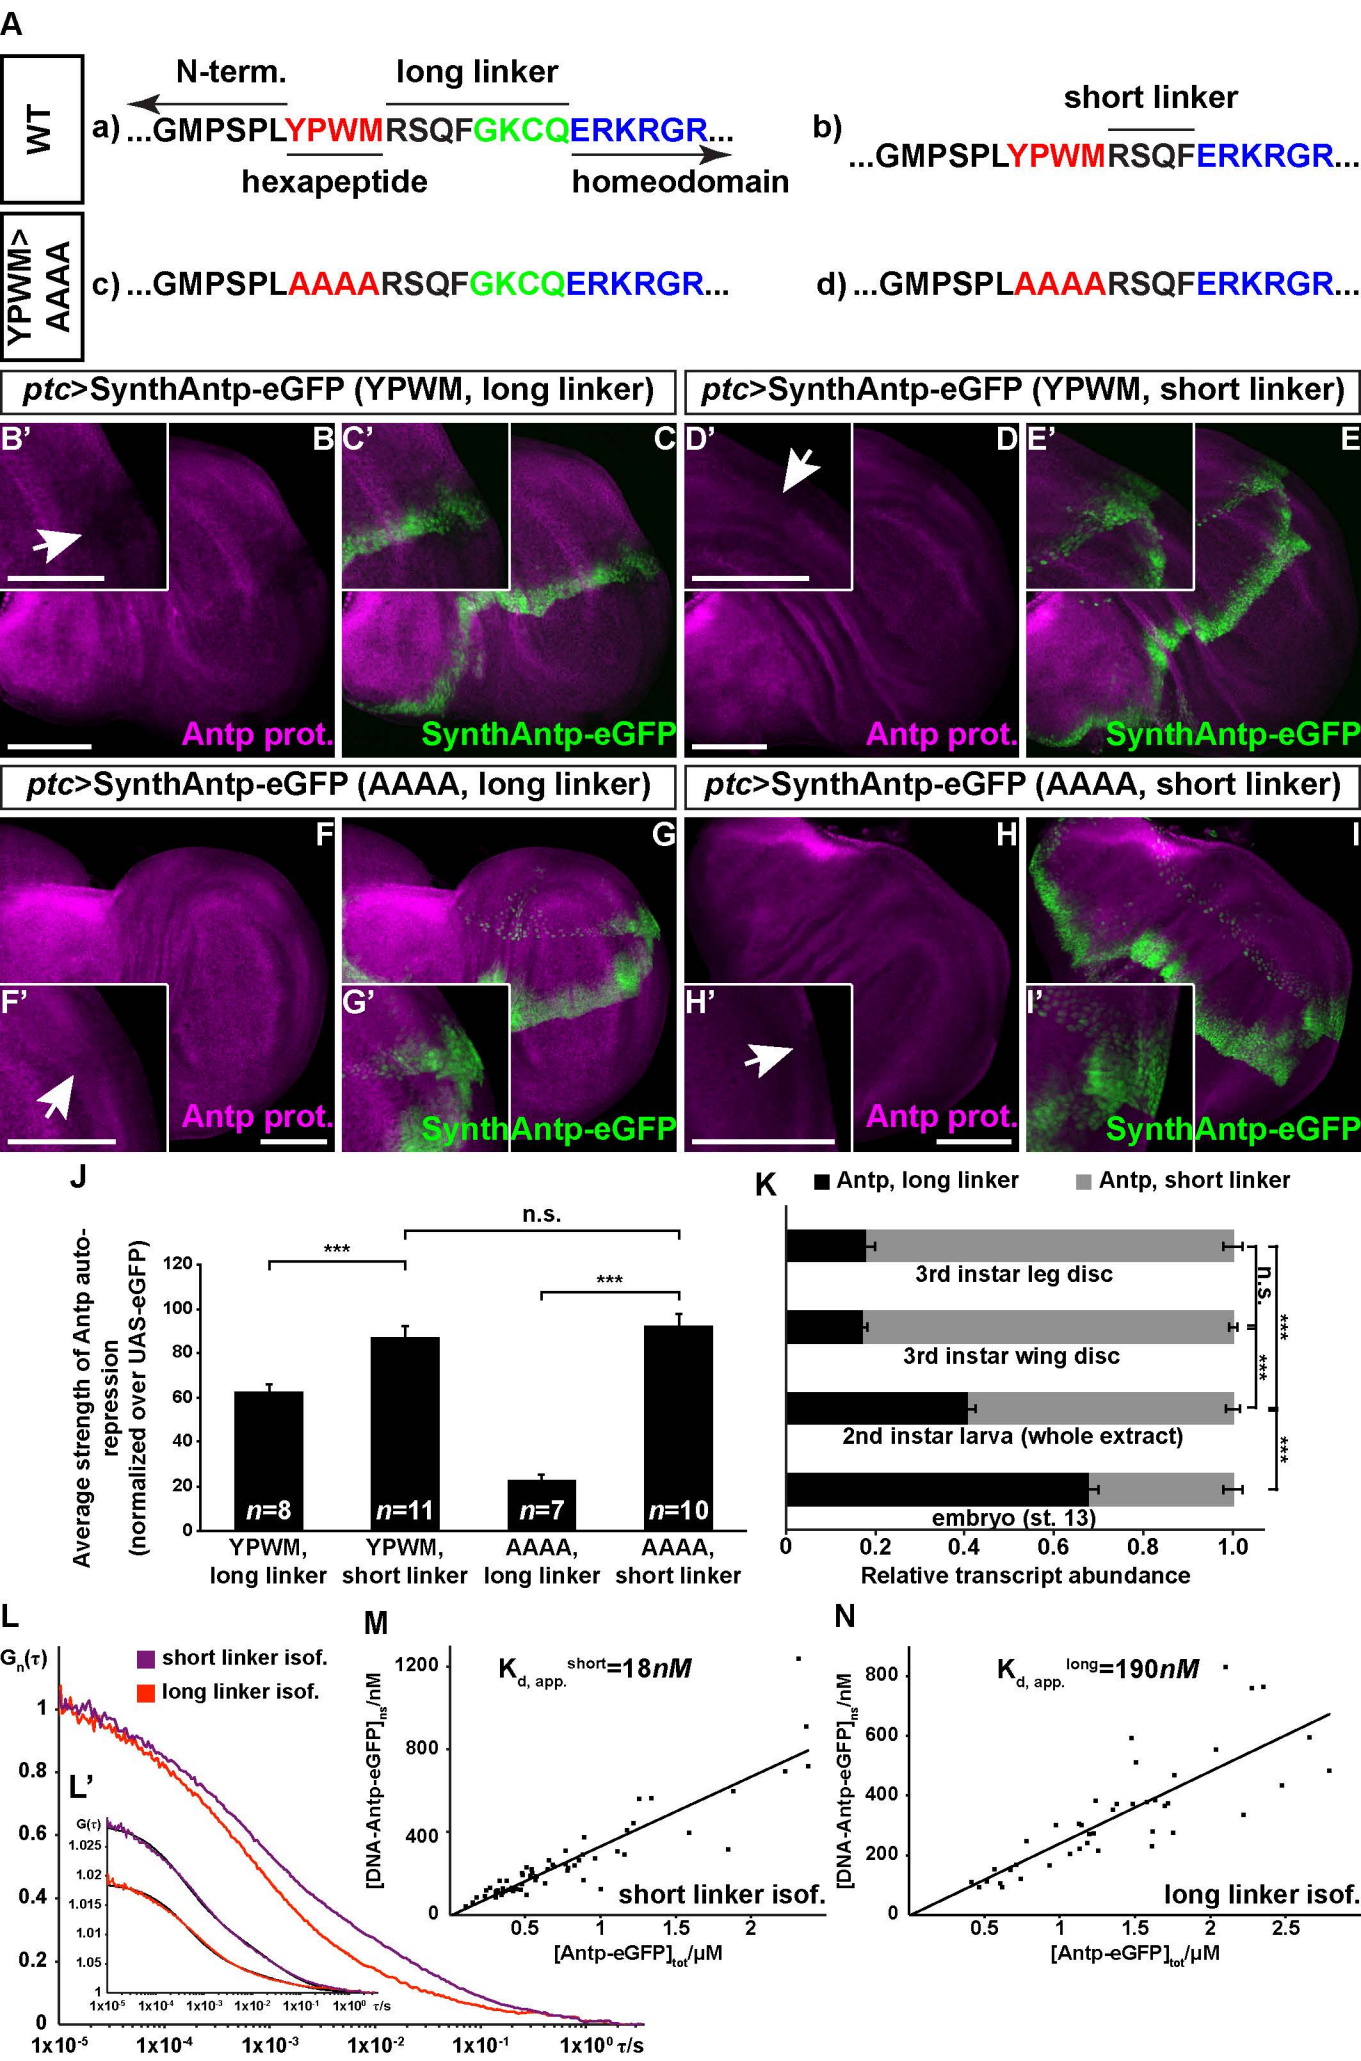

Figure 7 - figure supplement 1

**A**

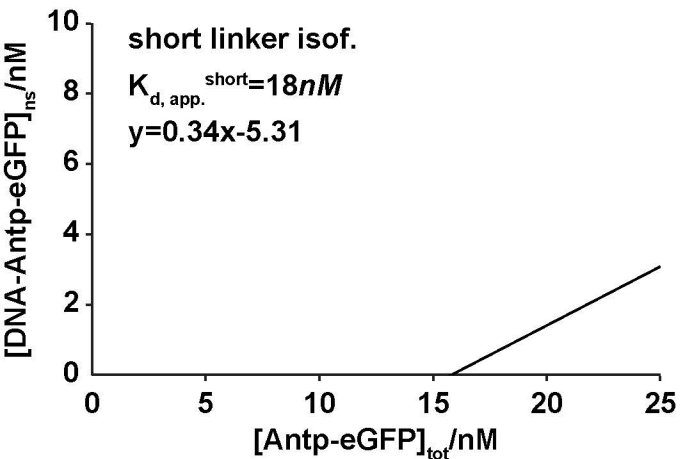

**B**

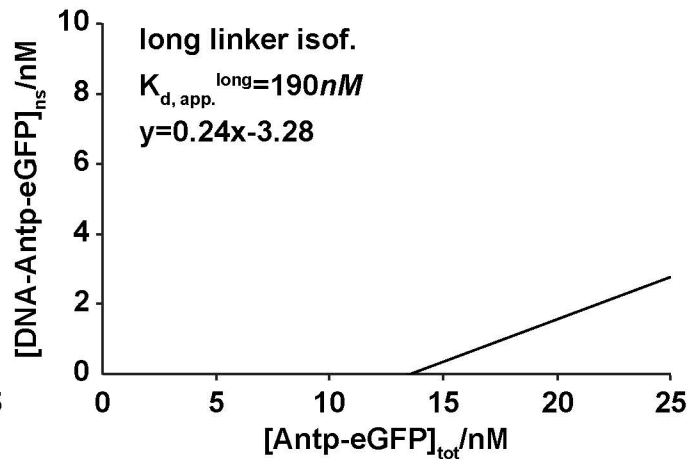

Figure 7 - figure supplement 2

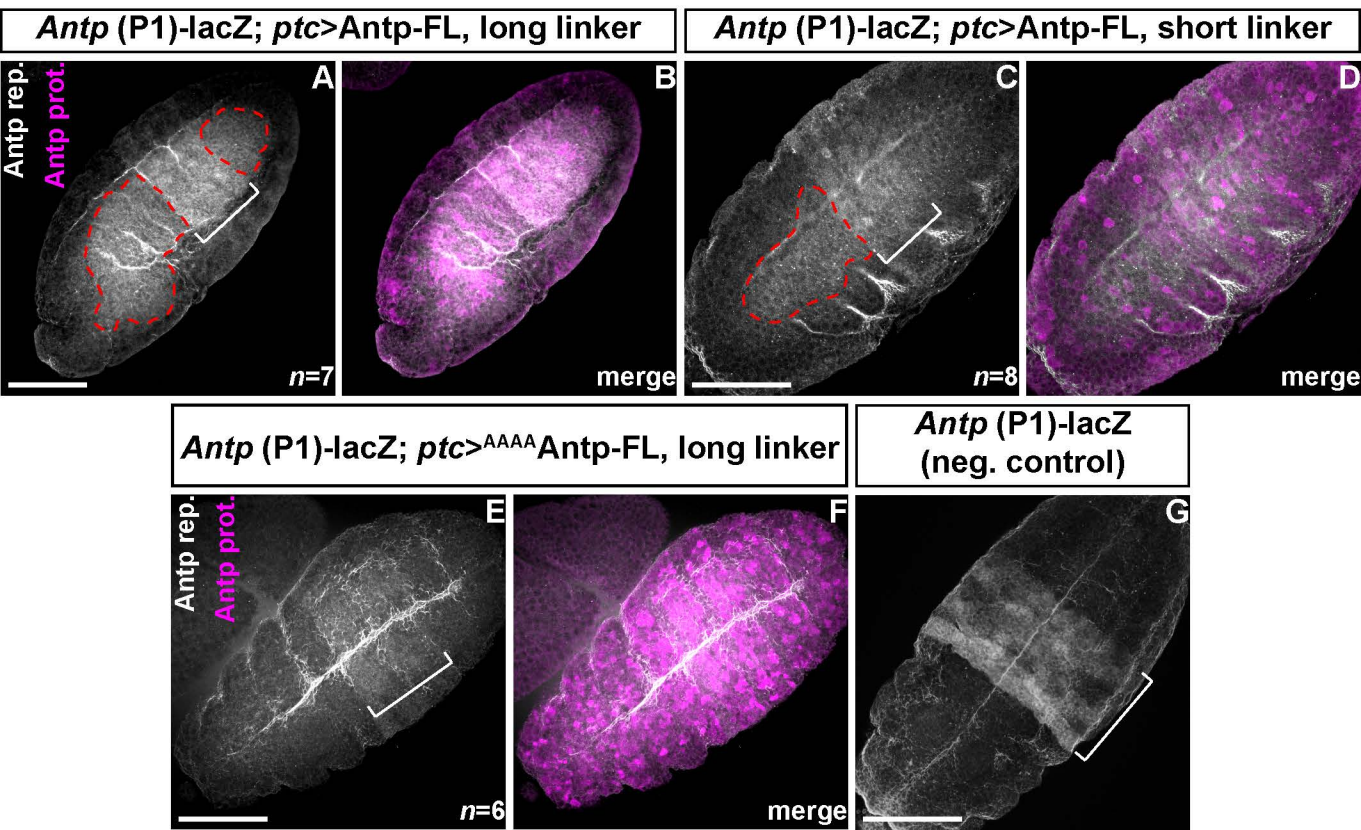

**Figure 8**

**DEVELOPMENT** →

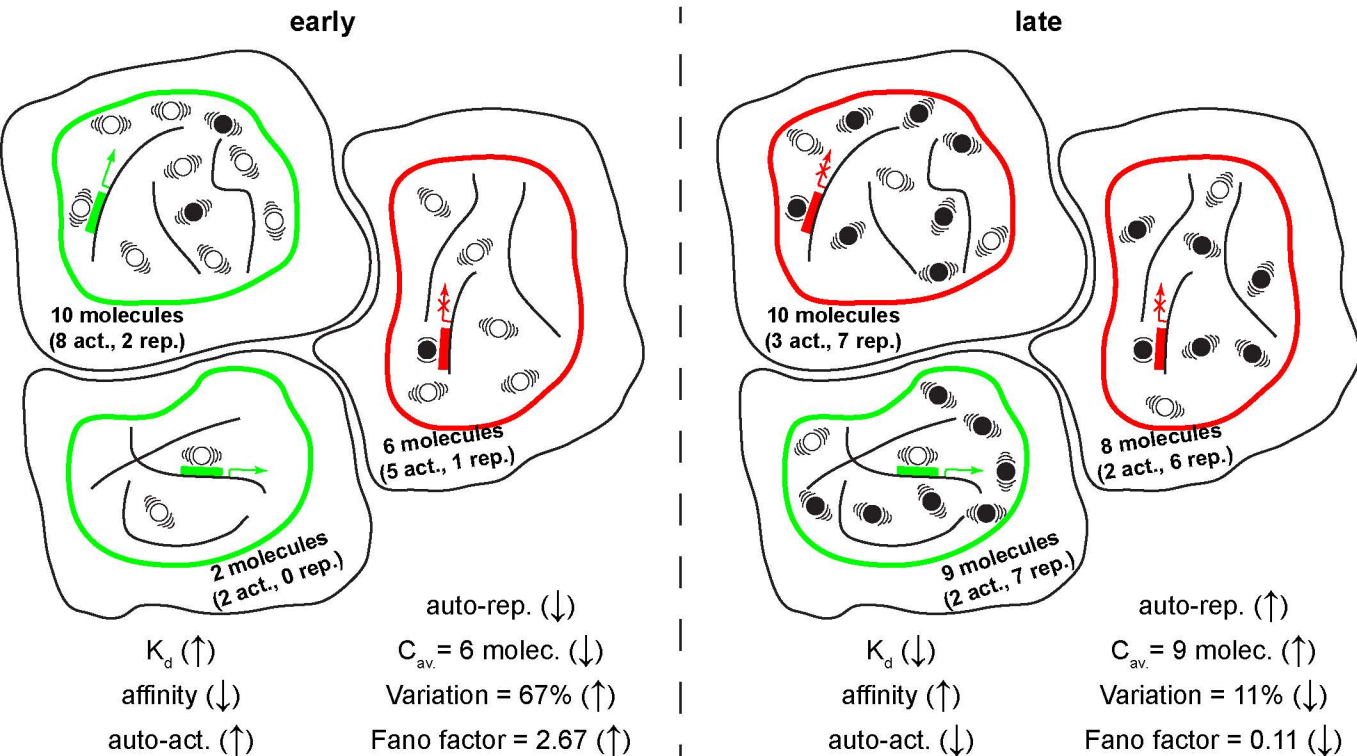

transcriptionally active *Antp* locus

repressed *Antp* locus

DNA

activating *Antp* isoform with lower affinity of DNA-binding

repressive *Antp* isoform with higher affinity of DNA-binding



Figure 8 - figure supplement 1

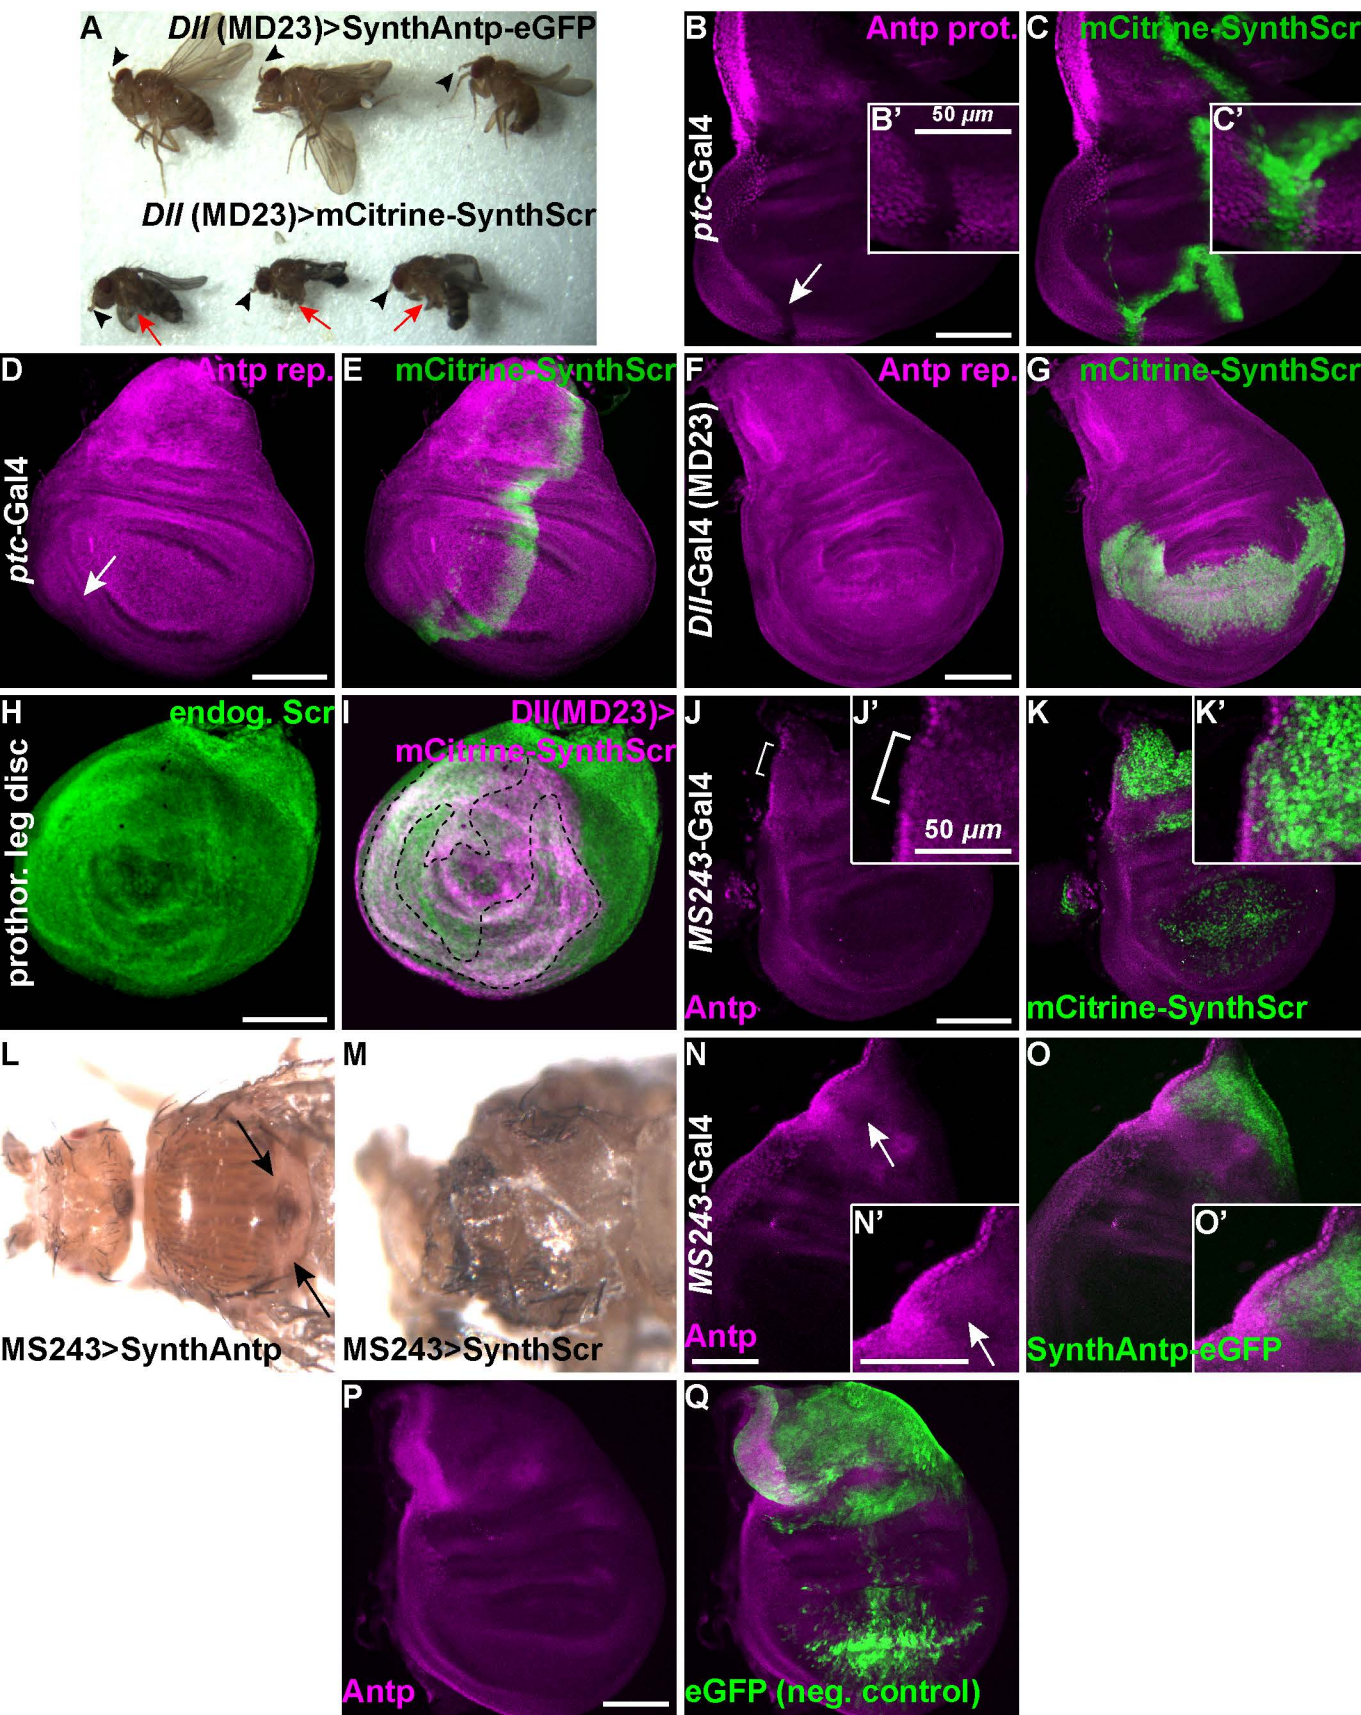

Source: http://biorxiv.org/content/10.1101/115220v1.full.pdf
